# Supplementary material for: Copper-catalyzed C–H ethoxycarbonyldifluoromethylation of imidazoheterocycles
Source: Royal Society of Chemistry journal article supplement (doi:10.1039/c5ob02363g), 2015-12-10

## Copper-catalyzed C-H ethoxycarbonyldifluoromethylation of imidazoheterocycles

Subhajit Mishra, Pallab Mondal, Monoranjan Ghosh, Susmita Mondal and Alakananda Hajra\*

*Department of Chemistry, Visva-Bharati (A Central University), Santiniketan 731235, India;*

*Tel./Fax: +913463 261526; E-mail: [alakananda.hajra@visva-bharati.ac.in](mailto:alakananda.hajra@visva-bharati.ac.in)*

### Table of Contents:

| Contents:                                                  | Page No. |
|------------------------------------------------------------|----------|
| 1. General information.....                                | S2       |
| 2. Typical experimental procedure.....                     | S2       |
| 3. Characterization data for the synthesized products..... | S3-S10   |
| 4. NMR spectra for the synthesized products.....           | S11-S56  |

## 1. General Information:

<sup>1</sup>H NMR spectra were determined on a 400 MHz (Bruker Avance) spectrometer using solutions in CDCl<sub>3</sub>. Chemical shifts (δ) are expressed in parts per million and are referenced to tetramethylsilane (TMS) as an internal standard. The multiplicities of the signals are reported as s (singlet), d (doublet), t (triplet), dd (doublet of doublets), or m (multiplet), and coupling constants (J) are given in hertz. Proton-decoupled <sup>13</sup>C{<sup>1</sup>H} NMR spectra were recorded at 100 MHz (Bruker Avance). Proton-decoupled <sup>19</sup>F NMR spectra were recorded at 376.5 MHz (Bruker Avance). HRMS analysis was performed on a Q-TOF mass analyzer (Agilent Accurate-Mass Q-TOF LC/MS-6520) using the ESI ionization method. Elemental analyses were performed by a PerkinElmer, Series II, CHNS/O analyser-2400. TLC was done on silica gel 60 F<sub>254</sub> coated on aluminum sheets (Merck). Silica gel (60-120 mesh) was used for column chromatography. Petroleum ether refers to the fraction boiling in the range of 60-80 °C unless otherwise mentioned. All of the solvents were dried and distilled before use. All of the reactions involving moisture-sensitive reactants were executed using oven-dried glassware.

## 2. Typical experimental procedure for the compound (3a):

The mixture of 8-methyl-2-phenylimidazo[1,2-*a*]pyridine (**1a**, 41 mg, 0.20 mmol), ethyl-2-bromo-2,2-difluoroacetate (**2**, 51 μL, 2 equiv), Cu<sub>2</sub>O (3 mg, 10 mol%), 1,10-phenanthroline (4.4 mg, 12mol%) and K<sub>2</sub>CO<sub>3</sub> (55 mg, 2 equiv) in CH<sub>3</sub>CN (1 mL) was stirred at 80 °C under air in the sealed tube for 10 h. After completion of the reaction (TLC), the reaction mixture was cooled to room temperature and extracted with ethylacetate/water. The organic phase was dried over anhydrous Na<sub>2</sub>SO<sub>4</sub>. The crude residue was obtained after evaporation of the solvent in vacuum and purified by column chromatography on silica gel (60-120 mesh) using *n*-hexane/EtOAc (9:1) as the eluent to afford pure **3a** as colorless oil (55 mg, 84% yield).

### 3. Characterization data for the synthesized products:

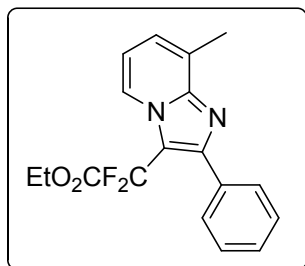

**Ethyl-2,2-difluoro-2-(8-methyl-2-phenylimidazo[1,2-*a*]pyridin-3-yl)acetate (3a):** Colourless oil (84%, 55 mg);  $^1\text{H}$  NMR (400 MHz,  $\text{CDCl}_3$ ):  $\delta$  8.31 (d,  $J = 7.2$  Hz, 1H), 7.55 (d,  $J = 9.2$  Hz, 2H), 7.37-7.32 (m, 3H), 7.07 (d,  $J = 6.8$  Hz, 1H), 6.78 (t,  $J = 7.2$  Hz, 1H), 3.86 (q,  $J = 7.2$  Hz, 2H), 2.58 (s, 3H), 1.06 (t,  $J = 7.2$  Hz, 3H);  $^{13}\text{C}$  NMR (100 MHz,  $\text{CDCl}_3$ ):  $\delta$  162.5 (t,  $J_{\text{C-F}} = 32$  Hz), 147.6, 146.7, 133.7, 129.9, 128.8, 128.2, 128.0, 125.5, 124.4 (t,  $J_{\text{C-F}} = 16$  Hz), 113.6, 112.0, 111.6 (t,  $J_{\text{C-F}} = 242$  Hz), 63.6, 17.3, 13.7;  $^{19}\text{F}$  NMR (376.5 MHz,  $\text{CDCl}_3$ ):  $\delta$  -98.3; HRMS (ESI-TOF)  $m/z$ :  $[\text{M} + \text{H}]^+$  Calcd for  $\text{C}_{18}\text{H}_{16}\text{F}_2\text{N}_2\text{O}_2$ : 331.1258; found: 331.1264.

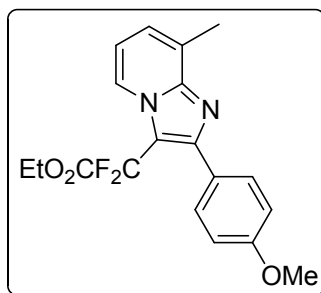

**Ethyl-2,2-difluoro-2-(2-(4-methoxyphenyl)-8-methylimidazo[1,2-*a*]pyridin-3-yl)acetate (3b):** Colourless oil (85%, 61 mg);  $^1\text{H}$  NMR (400 MHz,  $\text{CDCl}_3$ ):  $\delta$  8.36 (d,  $J = 7.2$  Hz, 1H), 7.57 (d,  $J = 8.4$  Hz, 2H), 7.12 (d,  $J = 7.2$  Hz, 1H), 6.96 (d,  $J = 8.4$  Hz, 2H), 6.83 (t,  $J = 6.8$  Hz, 1H), 3.99 (q,  $J = 7.2$  Hz, 2H), 3.84 (s, 3H), 2.64 (s, 3H), 1.15 (t,  $J = 7.2$  Hz, 3H);  $^{13}\text{C}$  NMR (100 MHz,  $\text{CDCl}_3$ ):  $\delta$  162.6 (t,  $J_{\text{C-F}} = 35$  Hz), 160.1, 147.5, 147.5, 146.6, 131.1, 127.8, 126.1, 125.4, 124.3 (t,  $J_{\text{C-F}} = 6$  Hz), 113.7, 113.4, 111.9, 111.7 (t,  $J_{\text{C-F}} = 246$  Hz), 111.6, 63.6, 55.4, 17.3, 13.7;  $^{19}\text{F}$  NMR (376.5 MHz,  $\text{CDCl}_3$ ):  $\delta$  -98.6; HRMS (ESI-TOF)  $m/z$ :  $[\text{M} + \text{H}]^+$  Calcd for  $\text{C}_{19}\text{H}_{18}\text{F}_2\text{N}_2\text{O}_3$ : 361.1364; found: 361.1384.

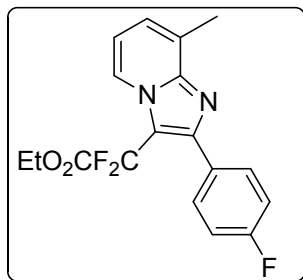

**Ethyl-2,2-difluoro-2-(2-(4-fluorophenyl)-8-methylimidazo[1,2-*a*]pyridin-3-yl)acetate (3c):** Colourless oil (83%, 57 mg);  $^1\text{H}$  NMR (400 MHz,  $\text{CDCl}_3$ ):  $\delta$  8.37 (d,  $J = 6.8$  Hz, 1H), 7.65-7.62 (m, 2H), 7.15-7.10 (m, 3H), 6.86 (t,  $J = 7.2$  Hz, 1H), 4.05 (q,  $J = 7.2$  Hz, 2H), 2.64 (s, 3H), 1.19 (t,  $J = 7.2$  Hz, 3H);  $^{13}\text{C}$  NMR (100 MHz,  $\text{CDCl}_3$ ):  $\delta$  163.2 (d,  $J_{\text{C-F}} = 247$  Hz), 162.6 (t,  $J_{\text{C-F}} = 36$  Hz), 146.7, 146.6, 131.7 (d,  $J_{\text{C-F}} = 9$  Hz), 129.8 (d,  $J_{\text{C-F}} = 3$  Hz), 128.0, 125.6, 124.3 (t,  $J_{\text{C-F}} = 6$  Hz), 115.2 (d,  $J_{\text{C-F}} = 21$  Hz), 113.7, 111.9, 111.5 (t,  $J_{\text{C-F}} = 247$  Hz), 63.8, 17.3, 13.8;  $^{19}\text{F}$  NMR (376.5 MHz,  $\text{CDCl}_3$ ):  $\delta$  -99.1, -113.0; Anal. Calcd for  $\text{C}_{18}\text{H}_{15}\text{F}_3\text{N}_2\text{O}_2$ : C, 62.07; H, 4.34; N, 8.04%; Found: C, 61.92; H, 4.20; N, 7.92%.

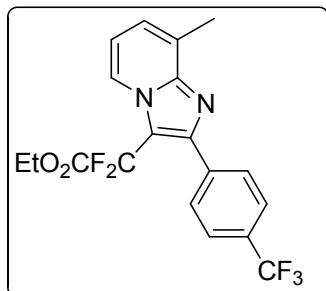

**Ethyl-2,2-difluoro-2-(8-methyl-2-(4-(trifluoromethyl)phenyl)imidazo[1,2-*a*]pyridin-3-yl)acetate (3d):** Colourless oil (75%, 59 mg);  $^1\text{H}$  NMR (400 MHz,  $\text{CDCl}_3$ ):  $\delta$  8.38 (d,  $J = 6.8$  Hz, 1H), 7.81 (d,  $J = 8.0$  Hz, 2H), 7.70 (d,  $J = 8.0$  Hz, 2H), 7.17 (d,  $J = 6.8$  Hz, 1H), 6.88 (t,  $J = 7.2$  Hz, 1H), 4.10 (q,  $J = 7.2$  Hz, 2H), 2.65 (s, 3H), 1.21 (t,  $J = 7.2$  Hz, 3H);  $^{13}\text{C}$  NMR (100 MHz,  $\text{CDCl}_3$ ):  $\delta$  162.6 (t,  $J_{\text{C-F}} = 35$  Hz), 146.9, 145.9, 137.5, 130.7 (q,  $J_{\text{C-F}} = 32$  Hz), 130.3, 128.2, 125.8, 125.1 (q,  $J_{\text{C-F}} = 4$  Hz), 124.3 (t,  $J_{\text{C-F}} = 5$  Hz), 124.2 (q,  $J_{\text{C-F}} = 270$  Hz), 113.9, 112.3 (t,  $J_{\text{C-F}} = 33$  Hz), 111.3 (t,  $J_{\text{C-F}} = 249$  Hz), 63.9, 17.2, 13.8;  $^{19}\text{F}$  NMR (376.5 MHz,  $\text{CDCl}_3$ ):  $\delta$  -62.6, -99.7; Anal. Calcd for  $\text{C}_{19}\text{H}_{15}\text{F}_5\text{N}_2\text{O}_2$ : C, 57.29; H, 3.80; N, 7.03%; Found: C, 57.04; H, 3.91; N, 6.94%.

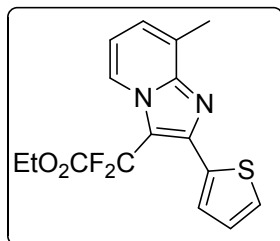

**Ethyl-2,2-difluoro-2-(8-methyl-2-(thiophen-2-yl)imidazo[1,2-*a*]pyridin-3-yl)acetate (3e):**

Brown oil (78%, 52 mg);  $^1\text{H}$  NMR (400 MHz,  $\text{CDCl}_3$ ):  $\delta$  8.35 (d,  $J = 6.8$  Hz, 1H), 7.43-7.40 (m, 2H), 7.12-7.07 (m, 2H), 6.82 (t,  $J = 7.2$  Hz, 1H), 4.13 (q,  $J = 7.2$  Hz, 2H), 2.64 (s, 3H), 1.20 (t,  $J = 7.2$  Hz, 3H);  $^{13}\text{C}$  NMR (100 MHz,  $\text{CDCl}_3$ ):  $\delta$  162.5 (t,  $J_{\text{C-F}} = 35$  Hz), 146.6, 140.9, 135.3, 128.5 (t,  $J_{\text{C-F}} = 4$  Hz), 127.9, 127.6, 127.4, 125.6, 124.3 (t,  $J_{\text{C-F}} = 7$  Hz), 113.7, 111.5 (t,  $J_{\text{C-F}} = 248$  Hz), 109.0, 63.8, 17.2, 13.8;  $^{19}\text{F}$  NMR (376.5 MHz,  $\text{CDCl}_3$ ):  $\delta$  -99.8; Anal. Calcd for  $\text{C}_{16}\text{H}_{14}\text{F}_2\text{N}_2\text{O}_2\text{S}$ : C, 57.13; H, 4.20; N, 8.33%; Found: C, 56.97; H, 4.12; N, 8.21%.

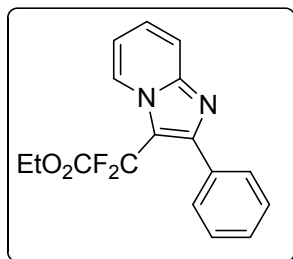

**Ethyl-2,2-difluoro-2-(2-phenylimidazo[1,2-*a*]pyridin-3-yl)acetate (3f):** Colourless oil (75%,

47 mg);  $^1\text{H}$  NMR (400 MHz,  $\text{CDCl}_3$ ):  $\delta$  8.53 (d,  $J = 6.8$  Hz, 1H), 7.70 (d,  $J = 9.2$  Hz, 1H), 7.63 (d,  $J = 7.2$  Hz, 2H), 7.45-7.41 (m, 3H), 7.36 (t,  $J = 8.0$  Hz, 1H), 6.95 (t,  $J = 6.8$  Hz, 1H), 3.97 (q,  $J = 7.2$  Hz, 2H), 1.14 (t,  $J = 7.2$  Hz, 3H);  $^{13}\text{C}$  NMR (100 MHz,  $\text{CDCl}_3$ ):  $\delta$  162.5, 159.1, 148.3, 146.3, 133.5, 129.7, 128.9, 128.2, 126.8, 126.7 (t,  $J_{\text{C-F}} = 6$  Hz), 118.0, 113.6, 111.7 (t,  $J_{\text{C-F}} = 258$  Hz), 63.7, 13.7;  $^{19}\text{F}$  NMR (376.5 MHz,  $\text{CDCl}_3$ ):  $\delta$  -98.5. Anal. Calcd for  $\text{C}_{17}\text{H}_{14}\text{F}_2\text{N}_2\text{O}_2$ : C, 64.55; H, 4.46; N, 8.86%; Found: C, 64.32; H, 4.32; N, 8.78%.

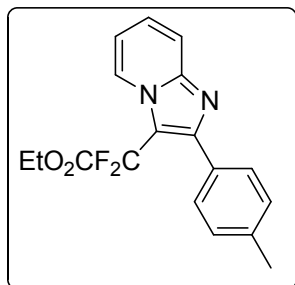

**Ethyl-2,2-difluoro-2-(2-(*p*-tolyl)imidazo[1,2-*a*]pyridin-3-yl)acetate (3g):** Colourless oil (80%, 52 mg);  $^1\text{H}$  NMR (400 MHz,  $\text{CDCl}_3$ ):  $\delta$  8.45 (d,  $J = 7.2$  Hz, 1H), 7.63 (d,  $J = 9.2$  Hz, 1H), 7.46 (d,  $J = 8.0$  Hz, 2H), 7.30-7.26 (m, 1H), 7.19-7.16 (m, 2H), 6.89-6.87 (m, 1H), 3.92 (q,  $J = 7.2$  Hz, 2H), 2.33 (s, 3H), 1.08 (t,  $J = 7.2$  Hz, 3H);  $^{13}\text{C}$  NMR (100 MHz,  $\text{CDCl}_3$ ):  $\delta$  162.5, 148.3, 146.2, 138.8, 130.4, 129.6, 128.9, 126.7 (t,  $J_{\text{C-F}} = 6$  Hz), 126.3, 117.9, 113.5, 111.6 (t,  $J_{\text{C-F}} = 246$  Hz), 111.4, 63.7, 21.4, 13.7;  $^{19}\text{F}$  NMR (376.5 MHz,  $\text{CDCl}_3$ ):  $\delta$  -98.6; HRMS (ESI-TOF)  $m/z$ :  $[\text{M} + \text{H}]^+$  Calcd for  $\text{C}_{18}\text{H}_{16}\text{F}_2\text{N}_2\text{O}_2$ : 331.1258; found: 331.1269.

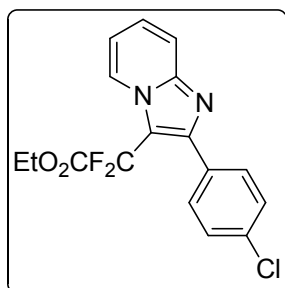

**Ethyl-2-(2-(4-chlorophenyl)imidazo[1,2-*a*]pyridin-3-yl)-2,2-difluoroacetate (3h):** Colourless oil (67%, 47 mg);  $^1\text{H}$  NMR (400 MHz,  $\text{CDCl}_3$ ):  $\delta$  8.52 (d,  $J = 7.2$  Hz, 1H), 7.70 (d,  $J = 9.2$  Hz, 1H), 7.62 (d,  $J = 8.4$  Hz, 2H), 7.43-7.40 (m, 2H), 7.39-7.34 (m, 1H), 6.96 (t,  $J = 7.2$  Hz, 1H), 4.12 (q,  $J = 7.2$  Hz, 2H), 1.21 (t,  $J = 7.2$  Hz, 3H);  $^{13}\text{C}$  NMR (100 MHz,  $\text{CDCl}_3$ ):  $\delta$  162.6 (t,  $J_{\text{C-F}} = 39$  Hz), 146.9, 146.4, 135.0, 132.0, 131.1, 128.4, 127.6, 127.0, 126.7 (t,  $J_{\text{C-F}} = 5$  Hz), 118.0, 113.7, 111.4 (t,  $J_{\text{C-F}} = 248$  Hz), 63.9, 13.8;  $^{19}\text{F}$  NMR (376.5 MHz,  $\text{CDCl}_3$ ):  $\delta$  -99.5; HRMS (ESI-TOF)  $m/z$ :  $[\text{M} + \text{H}]^+$  Calcd for  $\text{C}_{17}\text{H}_{13}\text{ClF}_2\text{N}_2\text{O}_2$ : 351.0712; found: 351.0740.

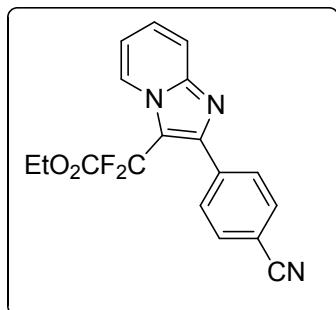

**Ethyl-2-(2-(4-cyanophenyl)imidazo[1,2-a]pyridin-3-yl)-2,2-difluoroacetate (3i):** Yellow oil (58%, 39 mg);  $^1\text{H}$  NMR (400 MHz,  $\text{CDCl}_3$ ):  $\delta$  8.53 (d,  $J = 7.2$  Hz, 1H), 7.84 (d,  $J = 8.8$  Hz, 2H), 7.75-7.70 (m, 2H), 7.42-7.38 (m, 1H), 7.01-6.98 (m, 1H), 4.22 (q,  $J = 7.2$  Hz, 2H), 1.27 (t,  $J = 7.2$  Hz, 3H);  $^{13}\text{C}$  NMR (100 MHz,  $\text{CDCl}_3$ ):  $\delta$  162.6, 146.6, 145.9, 138.2, 132.0, 130.5, 127.4, 126.7 (t,  $J_{\text{C-F}} = 6$  Hz), 125.9, 118.8, 118.2, 114.1, 112.5, 111.2 (t,  $J_{\text{C-F}} = 249$  Hz), 64.1, 13.9;  $^{19}\text{F}$  NMR (376.5 MHz,  $\text{CDCl}_3$ ):  $\delta$  -100.3; HRMS (ESI-TOF)  $m/z$ :  $[\text{M} + \text{H}]^+$  Calcd for  $\text{C}_{18}\text{H}_{13}\text{F}_2\text{N}_3\text{O}_2$ : 342.1054; found: 342.1067.

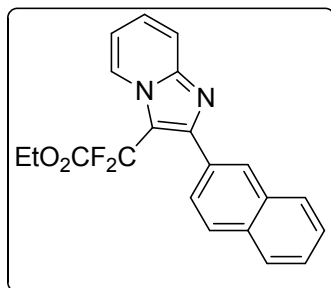

**Ethyl-2,2-difluoro-2-(2-(naphthalen-2-yl)imidazo[1,2-a]pyridin-3-yl)acetate (3j):** Brown oil (42%, 30 mg);  $^1\text{H}$  NMR (400 MHz,  $\text{CDCl}_3$ ):  $\delta$  8.57 (d,  $J = 7.2$  Hz, 1H), 8.11 (s, 1H), 7.93-7.86 (m, 3H), 7.81-7.79 (m, 1H), 7.74 (d,  $J = 9.2$  Hz, 1H), 7.53-7.50 (m, 2H), 7.38 (t,  $J = 8.0$  Hz, 1H), 6.97 (t,  $J = 6.8$  Hz, 1H), 3.89 (q,  $J = 7.2$  Hz, 2H), 1.08 (t,  $J = 7.2$  Hz, 3H);  $^{13}\text{C}$  NMR (100 MHz,  $\text{CDCl}_3$ ):  $\delta$  162.6, 148.2, 146.5, 133.4, 133.0, 130.8, 129.3, 128.5, 127.9, 127.8, 127.1, 126.9, 126.8 (t,  $J_{\text{C-F}} = 5$  Hz), 126.4, 125.3, 124.3, 118.0, 113.6, 111.6 (t,  $J_{\text{C-F}} = 249$  Hz), 63.7, 13.6;  $^{19}\text{F}$  NMR (376.5 MHz,  $\text{CDCl}_3$ ):  $\delta$  -98.5; Anal. Calcd for  $\text{C}_{21}\text{H}_{16}\text{F}_2\text{N}_2\text{O}_2$ : C, 68.85; H, 4.40; N, 7.65%; Found: C, 68.69; H, 4.29; N, 7.52%.

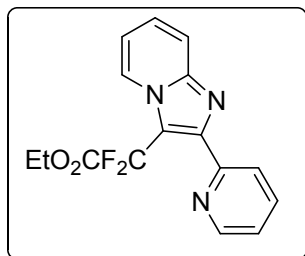

**Ethyl-2,2-difluoro-2-(2-(pyridin-2-yl)imidazo[1,2-a]pyridin-3-yl)acetate (3k):** Colourless oil (70%, 44 mg);  $^1\text{H}$  NMR (400 MHz,  $\text{CDCl}_3$ ):  $\delta$  8.63 (d,  $J = 7.2$  Hz, 1H), 8.52 (d,  $J = 4.4$  Hz, 1H), 8.20 (d,  $J = 7.6$  Hz, 1H), 7.83-7.78 (m, 1H), 7.76 (d,  $J = 8.8$  Hz, 1H), 7.36 (t,  $J = 8.8$  Hz, 1H), 7.27-7.24 (m, 1H), 6.96 (t,  $J = 7.6$  Hz, 1H), 4.08 (q,  $J = 7.2$  Hz, 2H), 1.04 (t,  $J = 7.2$  Hz, 3H);  $^{13}\text{C}$  NMR (100 MHz,  $\text{CDCl}_3$ ):  $\delta$  162.2 (t,  $J_{\text{C-F}} = 34$  Hz), 151.7, 147.9, 145.9, 145.3, 137.0, 127.3 (t,  $J_{\text{C-F}} = 10$  Hz), 126.9, 123.3, 122.3, 118.1, 114.1, 113.8, 112.5 (t,  $J_{\text{C-F}} = 243$  Hz), 62.8, 13.6;  $^{19}\text{F}$  NMR (376.5 MHz,  $\text{CDCl}_3$ ):  $\delta$  -96.4; Anal. Calcd for  $\text{C}_{16}\text{H}_{13}\text{F}_2\text{N}_3\text{O}_2$ : C, 60.57; H, 4.13; N, 13.24%; Found: C, 60.39; H, 3.98; N, 13.16%.

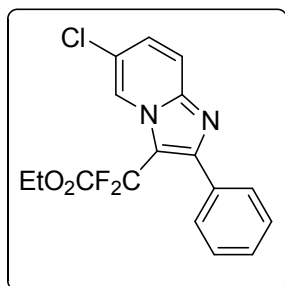

**Ethyl-2-(6-chloro-2-phenylimidazo[1,2-a]pyridin-3-yl)-2,2-difluoroacetate (3l):** Colourless oil (72%, 50 mg);  $^1\text{H}$  NMR (400 MHz,  $\text{CDCl}_3$ ):  $\delta$  8.58 (s, 1H), 7.66-7.60 (m, 3H), 7.46-7.42 (m, 3H), 7.35-7.32 (m, 1H), 4.00 (q,  $J = 7.2$  Hz, 2H), 1.16 (t,  $J = 7.2$  Hz, 3H);  $^{13}\text{C}$  NMR (100 MHz,  $\text{CDCl}_3$ ):  $\delta$  162.2 (t,  $J_{\text{C-F}} = 34$  Hz), 148.9, 144.7, 132.9, 129.6, 129.1, 128.9, 128.3, 124.6 (t,  $J_{\text{C-F}} = 6$  Hz), 121.9, 118.3, 112.2 (t,  $J_{\text{C-F}} = 31$  Hz), 111.2 (t,  $J_{\text{C-F}} = 248$  Hz), 63.9, 13.7;  $^{19}\text{F}$  NMR (376.5 MHz,  $\text{CDCl}_3$ ):  $\delta$  -98.8; HRMS (ESI-TOF)  $m/z$ :  $[\text{M} + \text{H}]^+$  Calcd for  $\text{C}_{17}\text{H}_{13}\text{ClF}_2\text{N}_2\text{O}_2$ : 351.0712; found: 351.0700.



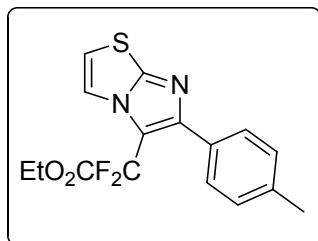

**Ethyl-2,2-difluoro-2-(6-(*p*-tolyl)imidazo[2,1-*b*]thiazol-5-yl)acetate (5a):** Yellow oil (85%, 57 mg);  $^1\text{H}$  NMR (400 MHz,  $\text{CDCl}_3$ ):  $\delta$  7.70 (d,  $J = 4.4$  Hz, 1H), 7.50 (d,  $J = 8.4$  Hz, 2H), 7.22 (d,  $J = 8.0$  Hz, 2H), 6.94 (d,  $J = 4.8$  Hz, 1H), 4.05 (q,  $J = 7.2$  Hz, 2H), 2.37 (s, 3H), 1.12 (t,  $J = 7.2$  Hz, 3H);  $^{13}\text{C}$  NMR (100 MHz,  $\text{CDCl}_3$ ):  $\delta$  162.4 (t,  $J_{\text{C-F}} = 35$  Hz), 151.4, 148.8, 138.8, 129.8, 129.0, 129.0, 119.9 (t,  $J_{\text{C-F}} = 5$  Hz), 113.7, 113.6 (t,  $J_{\text{C-F}} = 31$  Hz), 110.9 (t,  $J_{\text{C-F}} = 247$  Hz), 63.7, 21.4, 13.6;  $^{19}\text{F}$  NMR (376.5 MHz,  $\text{CDCl}_3$ ):  $\delta$  -97.2; Anal. Calcd for  $\text{C}_{16}\text{H}_{14}\text{F}_2\text{N}_2\text{O}_2\text{S}$ : C, 57.13; H, 4.20; N, 8.33%; Found: C, 56.95; H, 4.09; N, 8.20%.

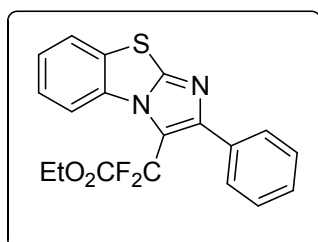

**Ethyl-2,2-difluoro-2-(2-phenylbenzo[*d*]imidazo[2,1-*b*]thiazol-3-yl)acetate (5b):** Brown oil (82%, 61 mg);  $^1\text{H}$  NMR (400 MHz,  $\text{CDCl}_3$ ):  $\delta$  8.11 (d,  $J = 8.0$  Hz, 1H), 7.73 (d,  $J = 8.8$  Hz, 1H), 7.57-7.55 (m, 2H), 7.52-7.48 (m, 1H), 7.46-7.38 (m, 4H), 3.73 (q,  $J = 7.2$  Hz, 2H), 1.05 (t,  $J = 7.2$  Hz, 3H);  $^{13}\text{C}$  NMR (100 MHz,  $\text{CDCl}_3$ ):  $\delta$  162.1 (t,  $J_{\text{C-F}} = 33$  Hz), 150.9, 150.2 (t,  $J_{\text{C-F}} = 6$  Hz), 133.3, 132.8, 130.1, 129.7, 129.0, 128.2, 126.7, 125.5, 124.2, 116.0 (t,  $J_{\text{C-F}} = 8$  Hz), 115.5 (t,  $J_{\text{C-F}} = 30$  Hz), 110.8 (t,  $J_{\text{C-F}} = 243$  Hz), 63.7, 13.5;  $^{19}\text{F}$  NMR (376.5 MHz,  $\text{CDCl}_3$ ):  $\delta$  -90.1; HRMS (ESI-TOF)  $m/z$ :  $[\text{M} + \text{H}]^+$  Calcd for  $\text{C}_{19}\text{H}_{14}\text{F}_2\text{N}_2\text{O}_2\text{S}$ : 373.0822; found: 373.0822.

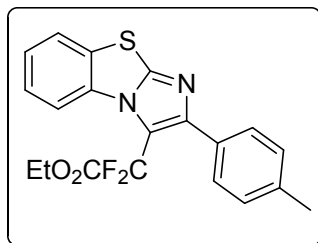

**Ethyl-2,2-difluoro-2-(2-(*p*-tolyl)benzo[*d*]imidazo[2,1-*b*]thiazol-3-yl)acetate (5c):** Brown oil (80%, 61 mg);  $^1\text{H}$  NMR (400 MHz,  $\text{CDCl}_3$ ):  $\delta$  8.10 (d,  $J = 8.0$  Hz, 1H), 7.73 (d,  $J = 8.8$  Hz, 1H), 7.52-7.48 (m, 1H), 7.45-7.38 (m, 3H), 7.23 (d,  $J = 7.6$  Hz, 2H), 3.76 (q,  $J = 7.2$  Hz, 2H), 2.39 (s, 3H), 1.07 (t,  $J = 7.2$  Hz, 3H);  $^{13}\text{C}$  NMR (100 MHz,  $\text{CDCl}_3$ ):  $\delta$  162.2 (t,  $J_{\text{C-F}} = 35$  Hz), 150.8, 150.4, 138.9, 132.9, 130.4, 130.1, 129.6, 128.9, 126.7, 125.4, 124.2, 116.0 (t,  $J_{\text{C-F}} = 8$  Hz), 115.3, 110.9 (t,  $J_{\text{C-F}} = 245$  Hz), 63.7, 21.8, 13.6;  $^{19}\text{F}$  NMR (376.5 MHz,  $\text{CDCl}_3$ ):  $\delta$  -90.1; HRMS (ESI-TOF)  $m/z$ :  $[\text{M} + \text{H}]^+$  Calcd for  $\text{C}_{20}\text{H}_{16}\text{F}_2\text{N}_2\text{O}_2\text{S}$ : 387.0979; found: 387.0979.

NMR spectra for the synthesized products

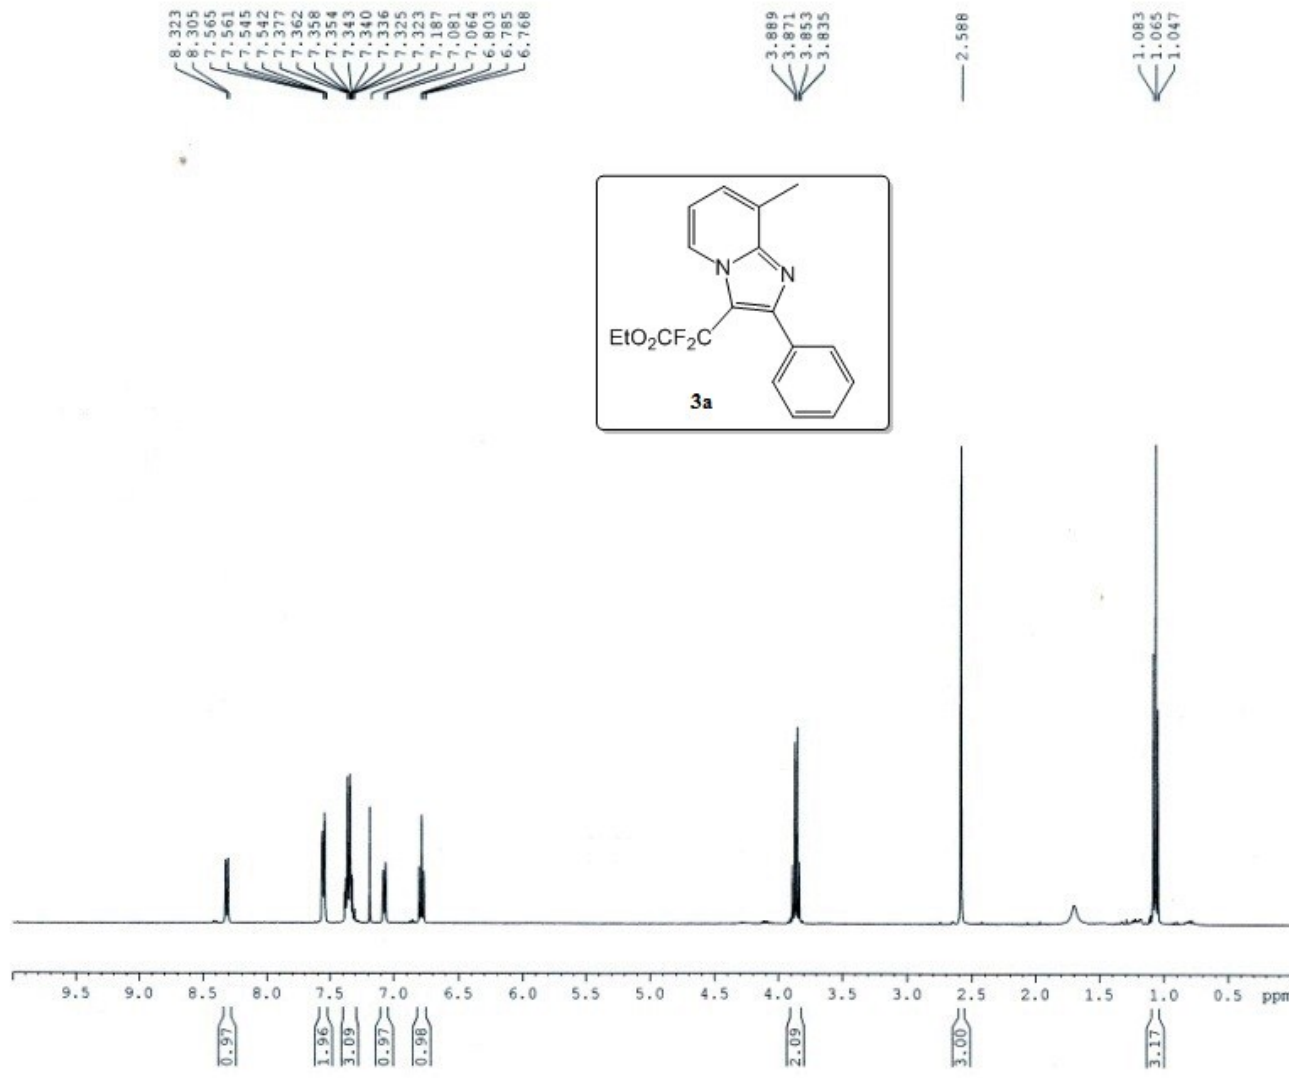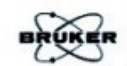

Current Data Parameters  
 NAME Dr. A HAJRA 2015  
 EXPNO 232  
 PROCNO 1

F2 - Acquisition Parameters  
 Date\_ 20150527  
 Time\_ 19.58  
 INSTRUM spect  
 PROBHD 5 mm PABBO BB/  
 PULPROG zg30  
 TD 32768  
 SOLVENT CDC13  
 NS 24  
 DS 2  
 SWH 8223.685 Hz  
 FIDRES 0.250967 Hz  
 AQ 1.9923444 sec  
 RG 106.66  
 DW 60.800 usec  
 DE 6.50 usec  
 TE 299.9 K  
 D1 1.00000000 sec  
 TDO 1

----- CHANNEL f1 -----  
 NUC1 1H  
 P1 14.75 usec  
 PLW1 11.99499989 W  
 SFO1 400.1524711 MHz

F2 - Processing parameters  
 SI 16384  
 SF 400.1500382 MHz  
 WDW EM  
 SSB 0  
 LB 0.30 Hz  
 GB 0  
 PC 1.00

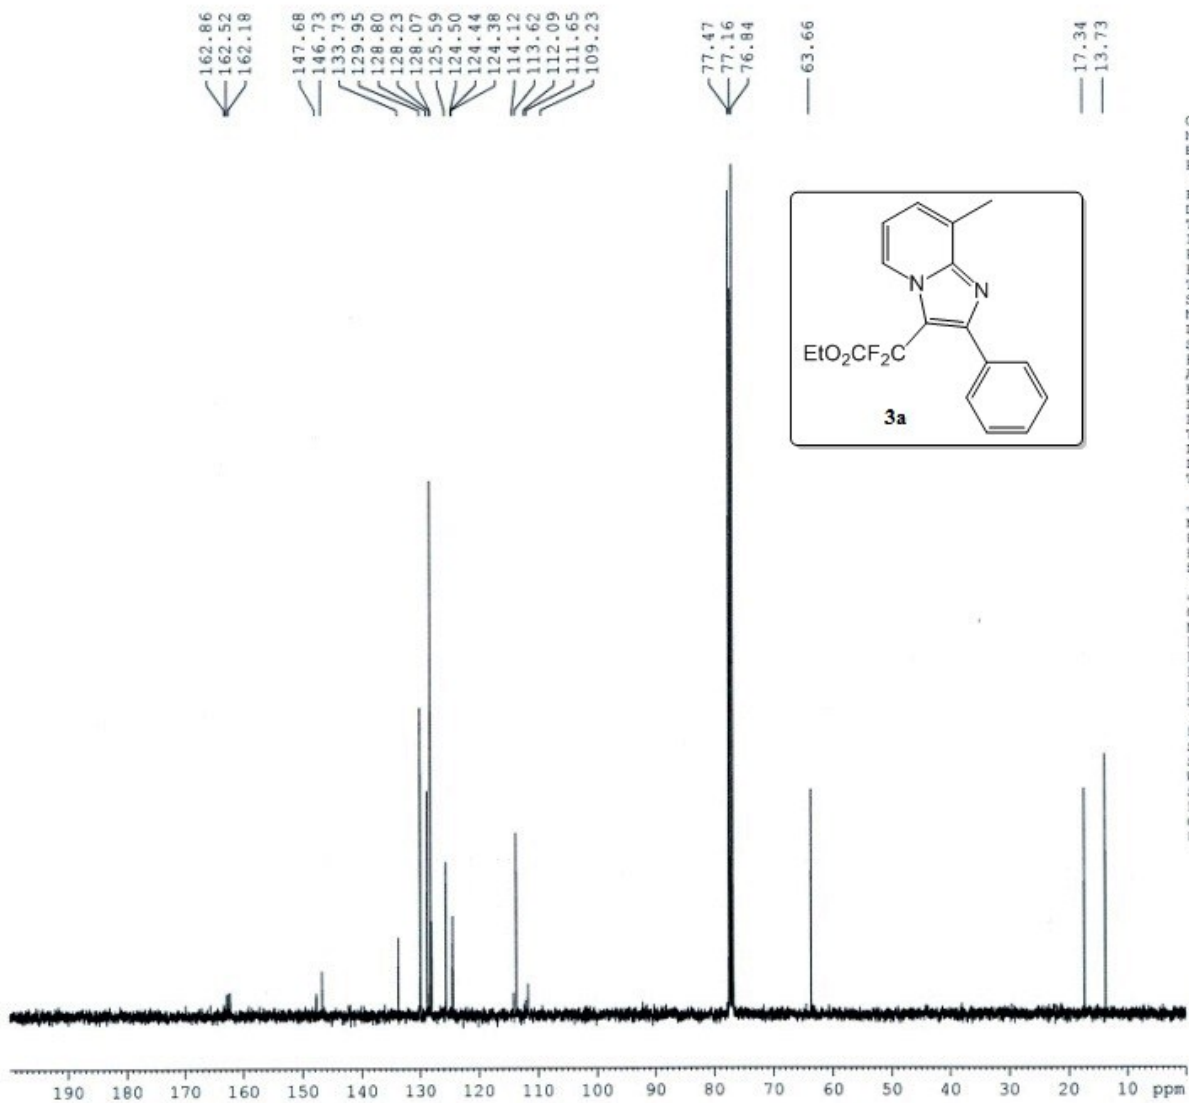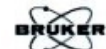

Current Data Parameters  
 NAME Dr. A HAJRA 2015  
 EXPNO 234  
 PROCNO 1

F2 - Acquisition Parameters  
 Date 20150527  
 Time 20.29  
 INSTRUM spect  
 PROBHD 5 mm PARBO BB/  
 PULPROG zgpg30  
 TD 32768  
 SOLVENT CDCl3  
 NS 500  
 DS 2  
 SWH 24038.461 Hz  
 FIDRES 0.733596 Hz  
 AQ 0.6816244 sec  
 RG 106.66  
 DW 20.800 usec  
 DE 6.50 usec  
 TE 301.1 K  
 D1 2.00000000 sec  
 D11 0.03000000 sec  
 TDO 1

----- CHANNEL f1 -----  
 NUC1 13C  
 P1 8.90 usec  
 PLW1 54.00000000 W  
 SFO1 100.6278588 MHz

----- CHANNEL f2 -----  
 CPDPRG2 waltz16  
 NUC2 1H  
 PCPD2 80.00 usec  
 PLW2 12.00000000 W  
 PLW12 0.40792999 W  
 PLW13 0.26107001 W  
 SFO2 400.1516006 MHz

F2 - Processing parameters  
 SI 16384  
 SF 100.6177830 MHz  
 WDW EM  
 SSB 0  
 LB 1.00 Hz  
 GB 0  
 PC 1.40

-98.39

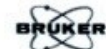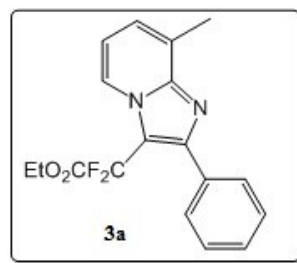

Current Data Parameters  
NAME Dr. A HAJRA 2015  
EXPNO 233  
PROCNO 1

F2 - Acquisition Parameters  
Date\_ 20150527  
Time 20.02  
INSTRUM spect  
PROBHD 5 mm FABBO BB/  
PULPROG zgpg30  
TD 32768  
SOLVENT CDCl3  
NS 16  
DS 2  
SWH 89285.711 Hz  
FIDRES 2.724784 Hz  
AQ 0.1835508 sec  
RG 106.66  
DW 5.600 usec  
DE 6.50 usec  
TE 299.9 K  
D1 1.00000000 sec  
TDO 1

----- CHANNEL f1 -----  
NUC1 19F  
P1 12.50 usec  
PLW1 20.00000000 W  
SFO1 376.4795333 MHz

F2 - Processing parameters  
SI 16384  
SF 376.5171850 MHz  
WDW EM  
SSB 0  
LB 0.30 Hz  
GB 0  
PC 1.00

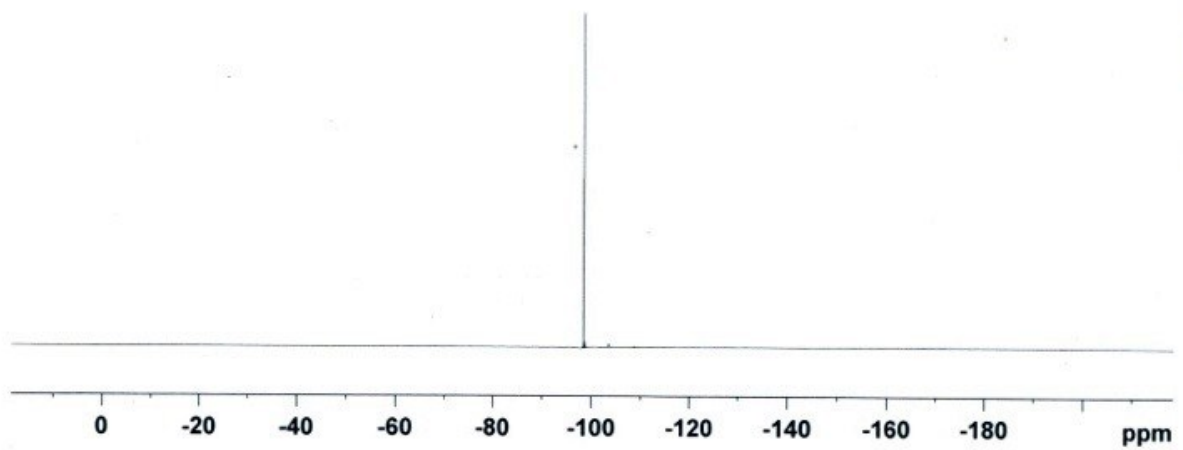

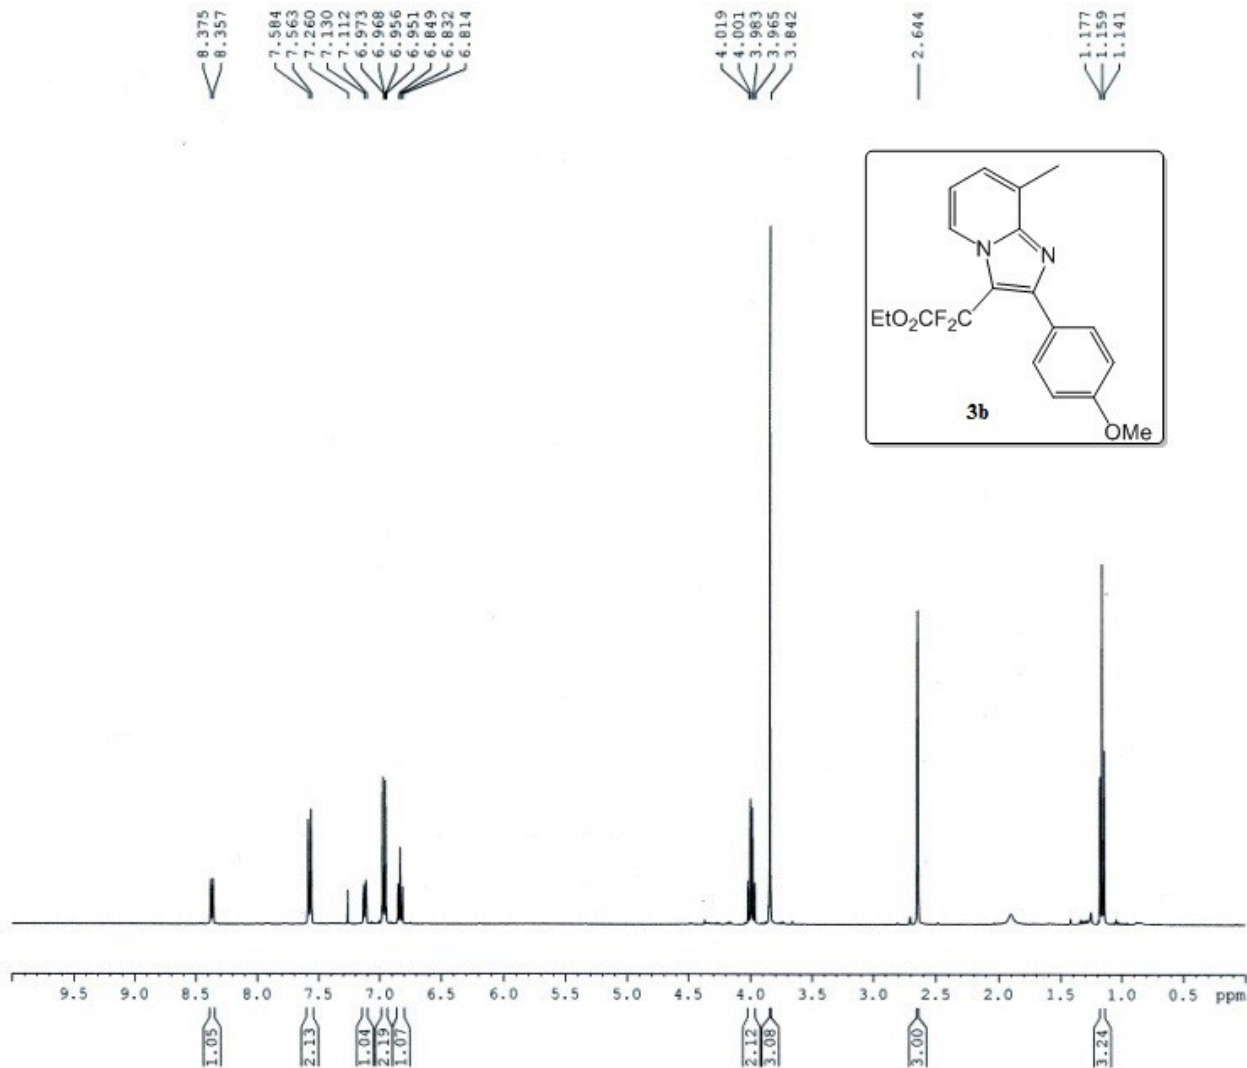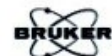

Current Data Parameters  
 NAME Dr. A HAJRA 2015  
 EXPNO 418  
 PROCNO 1

F2 - Acquisition Parameters  
 Date\_ 20150722  
 Time\_ 12.39  
 INSTRUM spect  
 PROBHD 5 mm PABBO BB/  
 PULPROG zg30  
 TD 32768  
 SOLVENT CDC13  
 NS 32  
 DS 1  
 SWH 8223.685 Hz  
 FIDRES 0.250967 Hz  
 AQ 1.9923444 sec  
 RG 67.81  
 DW 60.800 usec  
 DE 6.50 usec  
 TE 296.4 K  
 D1 1.00000000 sec  
 TD0 1

----- CHANNEL f1 -----  
 NUC1 1H  
 P1 14.75 usec  
 PLW1 11.99499989 W  
 SFO1 400.1524711 MHz

F2 - Processing parameters  
 SI 16384  
 SF 400.1500090 MHz  
 WDW EM  
 SSB 0  
 LB 0.30 Hz  
 GB 0  
 PC 1.00

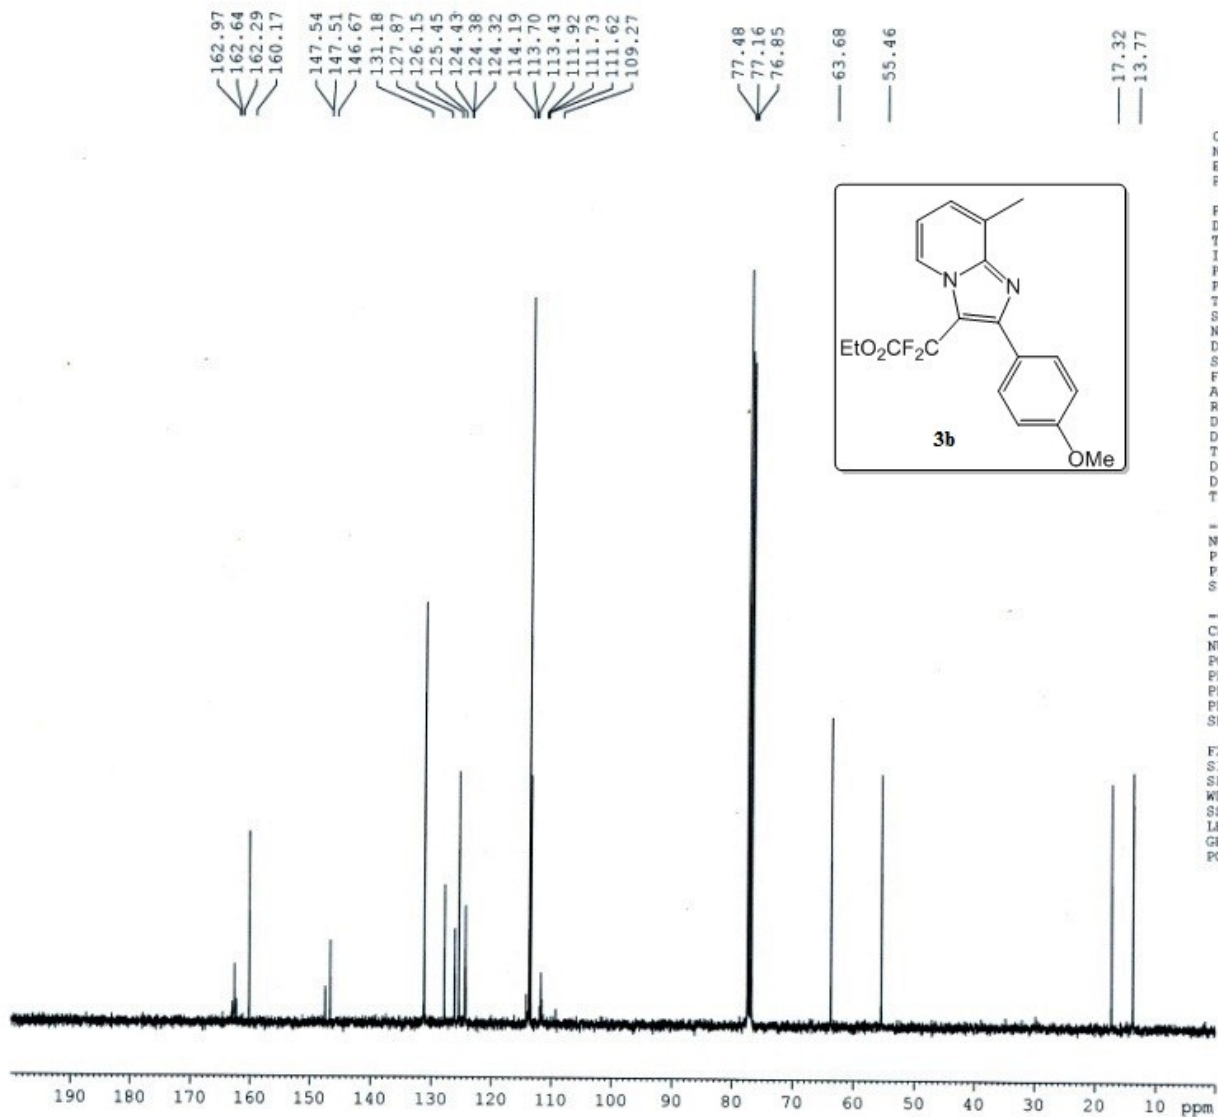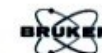

Current Data Parameters  
 NAME Dr. A HAJRA 2015  
 EXPNO 420  
 PROCNO 1

F2 - Acquisition Parameters  
 Date\_ 20150722  
 Time\_ 13.07  
 INSTRUM spect  
 PROBRD 5 mm PABBO BB/  
 PULPROG zgpg30  
 TD 32768  
 SOLVENT CDC13  
 NS 512  
 DS 2  
 SWH 24038.461 Hz  
 FIDRES 0.733596 Hz  
 AQ 0.6816244 sec  
 RG 67.81  
 DW 20.800 usec  
 DE 6.50 usec  
 TE 297.6 K  
 D1 2.00000000 sec  
 D11 0.03000000 sec  
 TD0 1

----- CHANNEL f1 -----  
 NUC1 13C  
 P1 8.90 usec  
 PLW1 54.00000000 W  
 SF01 100.6278588 MHz

----- CHANNEL f2 -----  
 CPDPRG2 waltz16  
 NUC2 1H  
 FCPD2 80.00 usec  
 PLW2 12.00000000 W  
 PLW12 0.40792599 W  
 PLW13 0.26107001 W  
 SF02 400.1516006 MHz

F2 - Processing parameters  
 SI 16384  
 SF 100.6177854 MHz  
 WDW EM  
 SSB 0  
 LB 1.00 Hz  
 GB 0  
 PC 1.40



-98.60

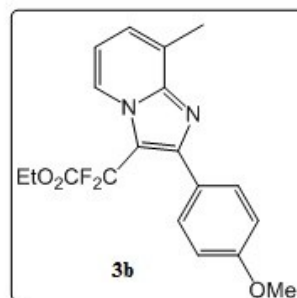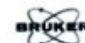

Current Data Parameters  
NAME Dr. A HAJRA 2015  
EXPNO 419  
PROCNO 1

F2 - Acquisition Parameters  
Date\_ 20150722  
Time 12.41  
INSTRUM spect  
PROBHD 5 mm PARAC SB/  
PULPROG zgpg30  
TD 32768  
SOLVENT CDC13  
NS 4  
DS 2  
SWH 89265.711 Hz  
FIDRES 2.724784 Hz  
AQ 0.1835508 sec  
RG 67.81  
DW 5.600 usec  
DE 6.50 usec  
TE 296.4 K  
D1 1.0000000 sec  
TDO 1

\*\*\*\*\* CHANNEL f1 \*\*\*\*\*  
NUC1 13F  
P1 12.75 usec  
PLM1 20.0000000 W  
SFO1 376.4795333 MHz

F2 - Processing parameters  
SI 16384  
SF 376.5171850 MHz  
WDW EM  
SSB 0  
LB 0.30 Hz  
GB 0  
PC 1.00

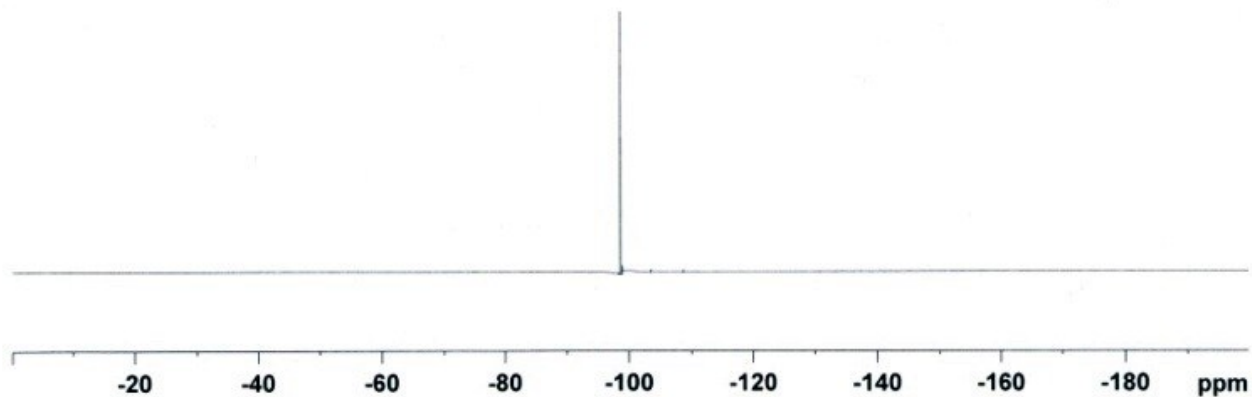

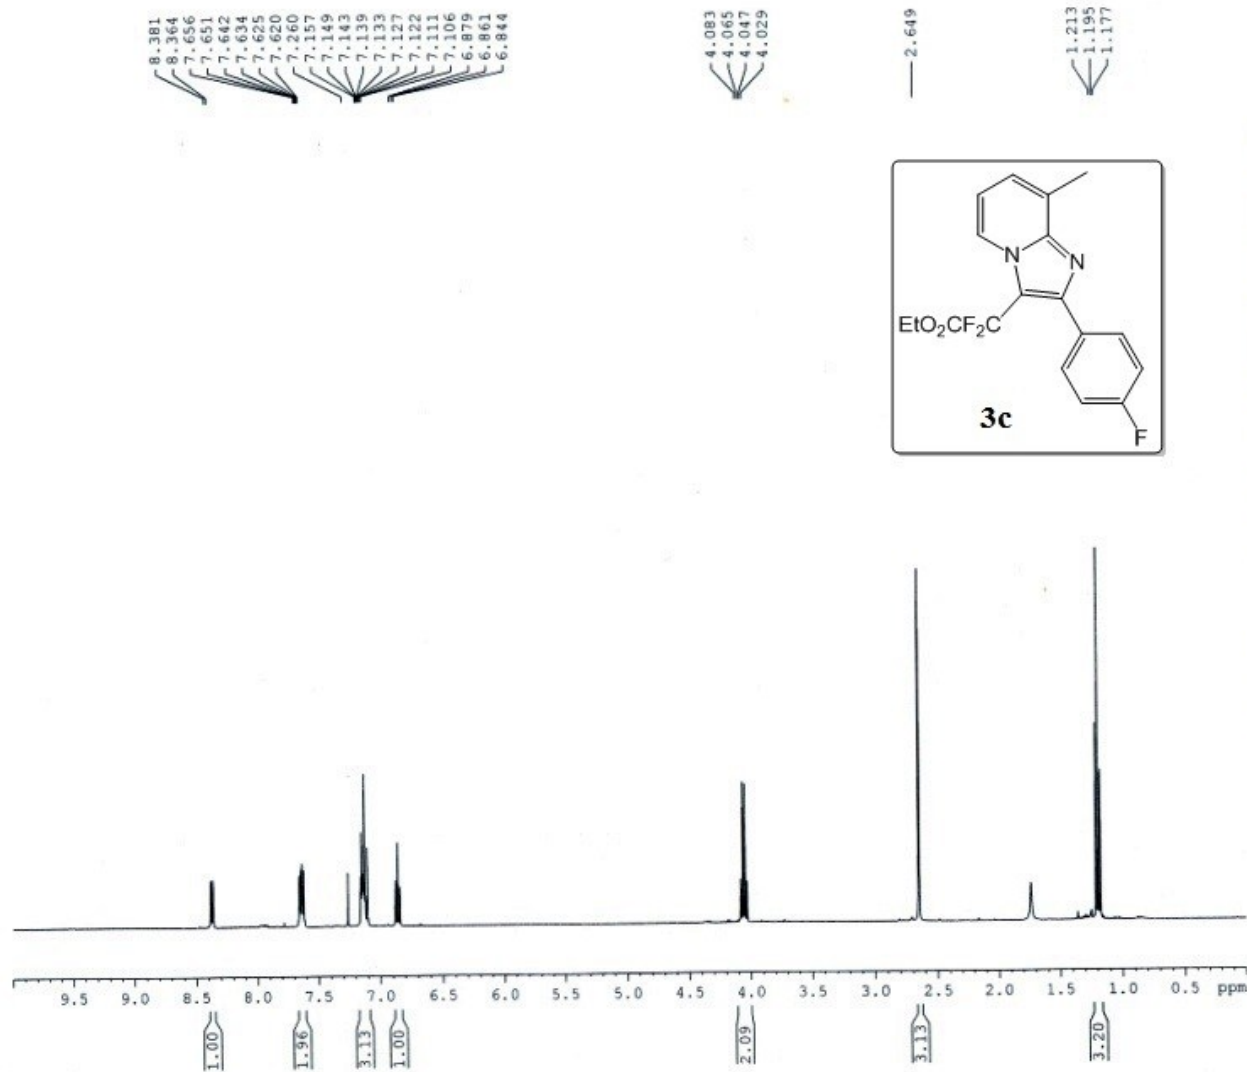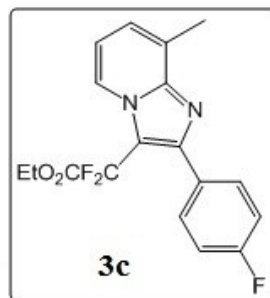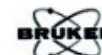

Current Data Parameters  
 NAME Dr. A HAJRA 2015  
 EXPNO 425  
 PROCNO 1

F2 - Acquisition Parameters  
 Date\_ 20150723  
 Time\_ 12.06  
 INSTRUM spect  
 PROBHD 5 mm PABBO BB/  
 PULPROG zg30  
 TD 32768  
 SOLVENT CDCl<sub>3</sub>  
 NS 32  
 DS 1  
 SWH 8223.685 Hz  
 FIDRES 0.250967 Hz  
 AQ 1.9923444 sec  
 RG 93.46  
 DW 60.800 usec  
 DE 6.50 usec  
 TE 296.4 K  
 D1 1.00000000 sec  
 TDO 1

===== CHANNEL f1 =====  
 NUC1 1H  
 P1 14.75 usec  
 PLW1 11.99499989 W  
 SFO1 400.1524711 MHz

F2 - Processing parameters  
 S1 16384  
 SF 400.1500090 MHz  
 WDW EM  
 SSB 0  
 LB 0.30 Hz  
 GB 0  
 PC 1.00

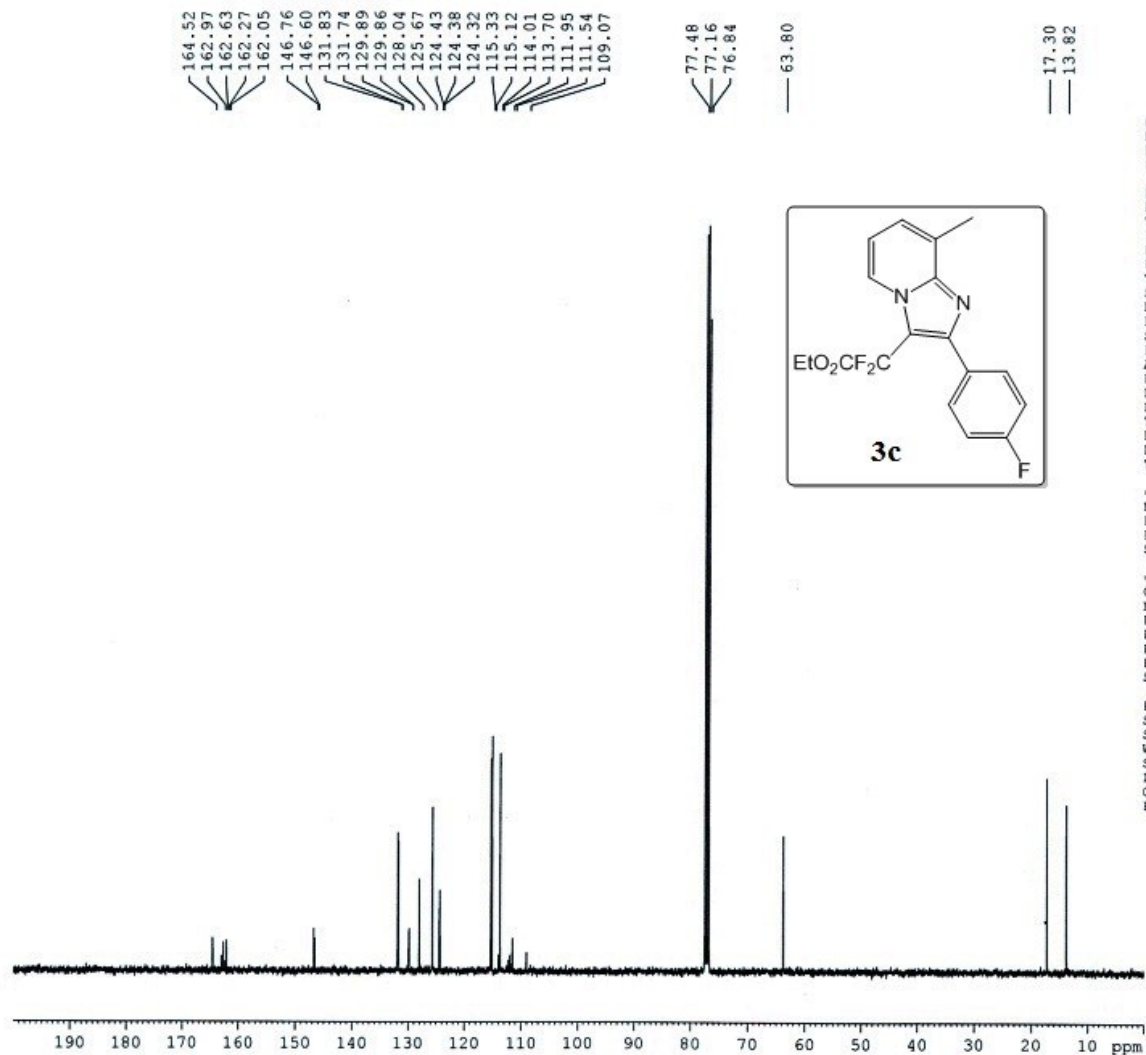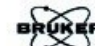

Current Data Parameters  
 NAME Dr. A HAJRA 2015  
 EXPNO 426  
 PROCNO 1

F2 - Acquisition Parameters  
 Date 20150723  
 Time 12.55  
 INSTRUM spect  
 PROBHD 5 mm PABBO BB/  
 PULPROG zgpg30  
 TD 32768  
 SOLVENT CDCl3  
 NS 1024  
 DS 2  
 SWH 24038.461 Hz  
 FIDRES 0.733596 Hz  
 AQ 0.6816244 sec  
 RG 93.46  
 DW 20.800 usec  
 DE 6.50 usec  
 TE 297.9 K  
 D1 2.0000000 sec  
 D11 0.0300000 sec  
 TDO 1

----- CHANNEL f1 -----  
 NUC1 13C  
 P1 8.90 usec  
 PLW1 54.0000000 W  
 SFO1 100.6278588 MHz

----- CHANNEL f2 -----  
 CPDPRG2 waltz16  
 NUC2 1H  
 PCPD2 80.00 usec  
 PLW2 12.0000000 W  
 PLW12 0.40792999 W  
 PLW13 0.26107001 W  
 SFO2 400.1516006 MHz

F2 - Processing parameters  
 SI 16384  
 SF 100.6177836 MHz  
 WDW EM  
 SSB 0  
 LB 1.00 Hz  
 GB 0  
 PC 1.40

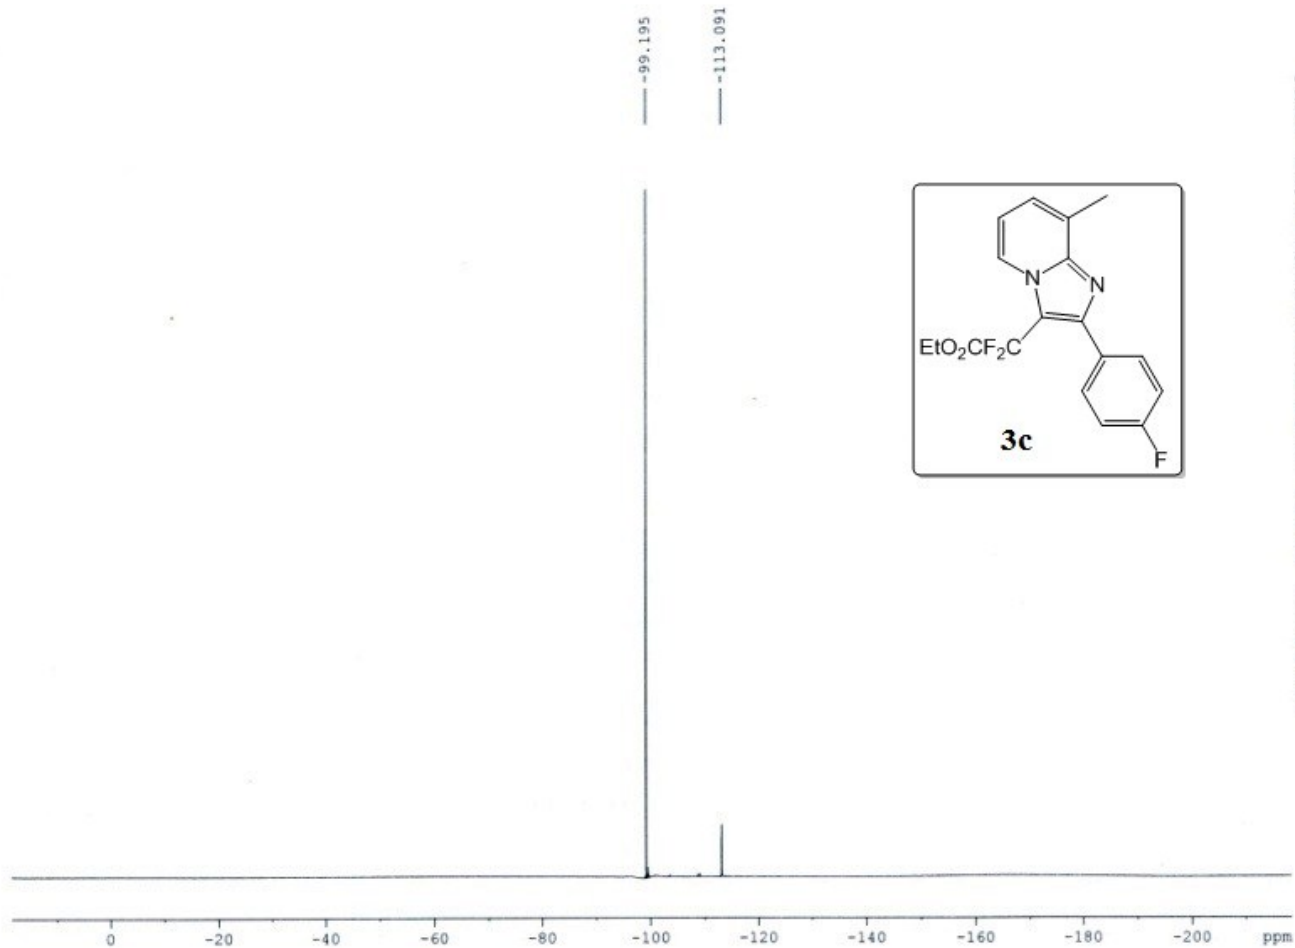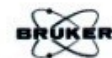

Current Data Parameters  
 NAME Dr. A HAJRA 2015  
 EXPNO 427  
 PROCNO 1

F2 - Acquisition Parameters  
 Date\_ 20150723  
 Time 12.58  
 INSTRUM spect  
 PROBHD 5 mm PABBO BB/  
 PULPROG zgfgqn  
 TD 32768  
 SOLVENT CDCl3  
 NS 4  
 DS 2  
 SWH 89285.711 Hz  
 FIDRES 2.724784 Hz  
 AQ 0.1835508 sec  
 RG 87.66  
 DW 5.600 usec  
 DE 6.50 usec  
 TE 297.1 K  
 D1 1.00000000 sec  
 TDO 1

----- CHANNEL f1 -----  
 NUC1 19F  
 P1 12.75 usec  
 PLW1 20.00000000 W  
 SFO1 376.4795333 MHz

F2 - Processing parameters  
 SI 16384  
 SF 376.5171850 MHz  
 WDW EM  
 SSB 0  
 LB 0.30 Hz  
 GB 0  
 PC 1.00

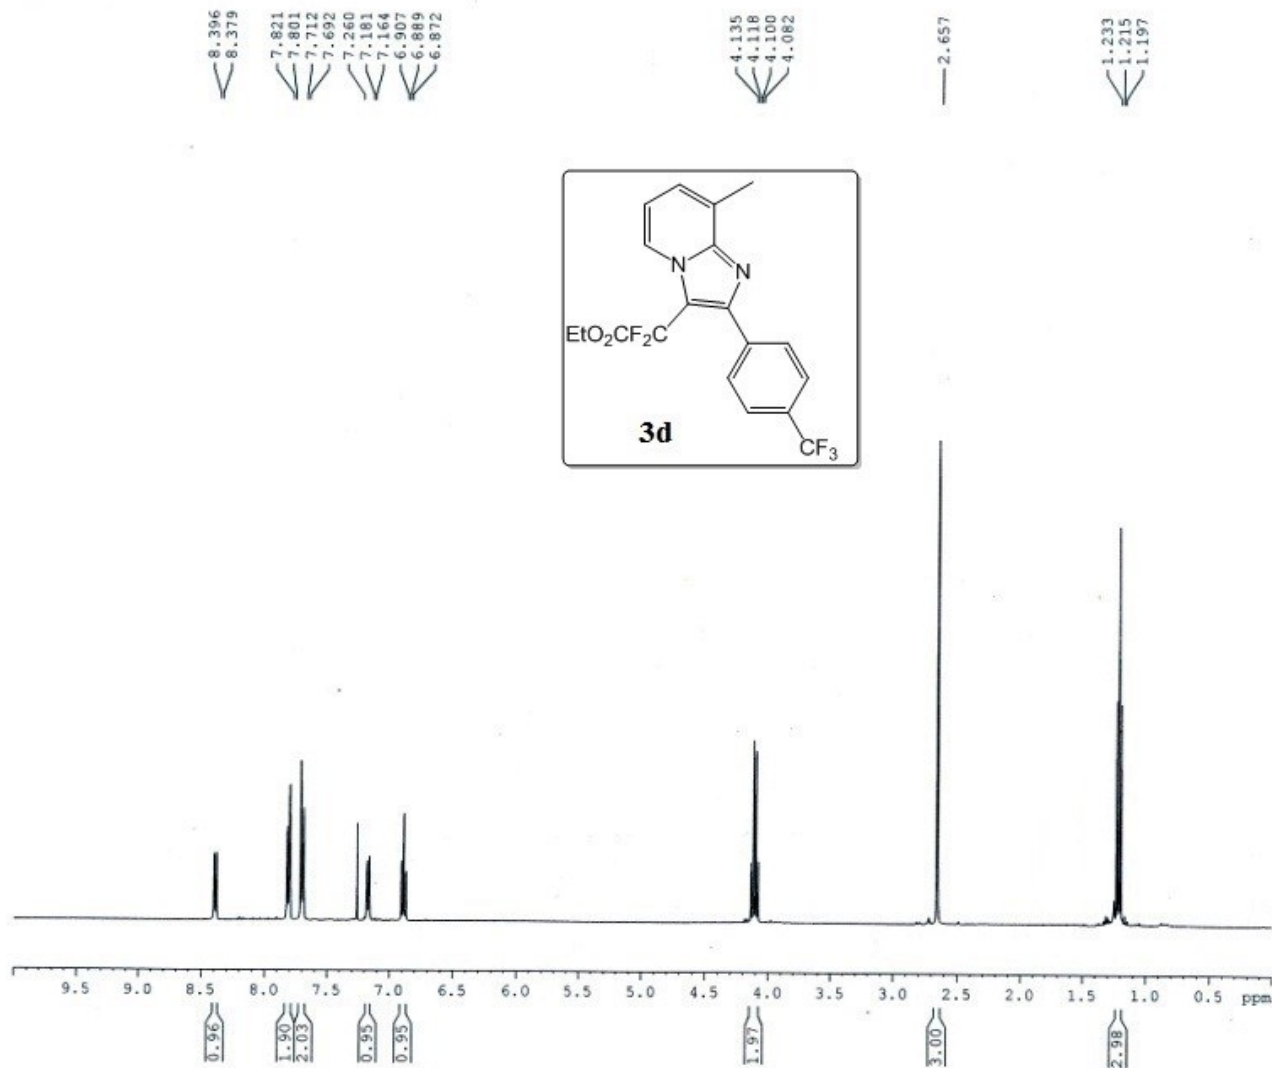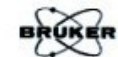

Current Data Parameters  
 NAME Dr. A HAJRA 2015  
 EXPNO 454  
 PROCNO 1

F2 - Acquisition Parameters  
 Date\_ 20150729  
 Time\_ 12.19  
 INSTRUM spect  
 PROBHD 5 mm PABBO BB/  
 PULPROG zg30  
 TD 32768  
 SOLVENT CDCl3  
 NS 24  
 DS 1  
 SWH 8223.685 Hz  
 FIDRES 0.250967 Hz  
 AQ 1.9923444 sec  
 RG 106.66  
 DW 60.800 usec  
 DE 6.50 usec  
 TE 293.8 K  
 D1 1.00000000 sec  
 TD0 1

===== CHANNEL f1 =====  
 NUC1 1H  
 P1 14.75 usec  
 PLW1 11.99499989 W  
 SFO1 400.1524711 MHz

F2 - Processing parameters  
 SI 16384  
 SF 400.1500090 MHz  
 WDW EM  
 SSB 0  
 LB 0.30 Hz  
 GB 0  
 PC 1.00

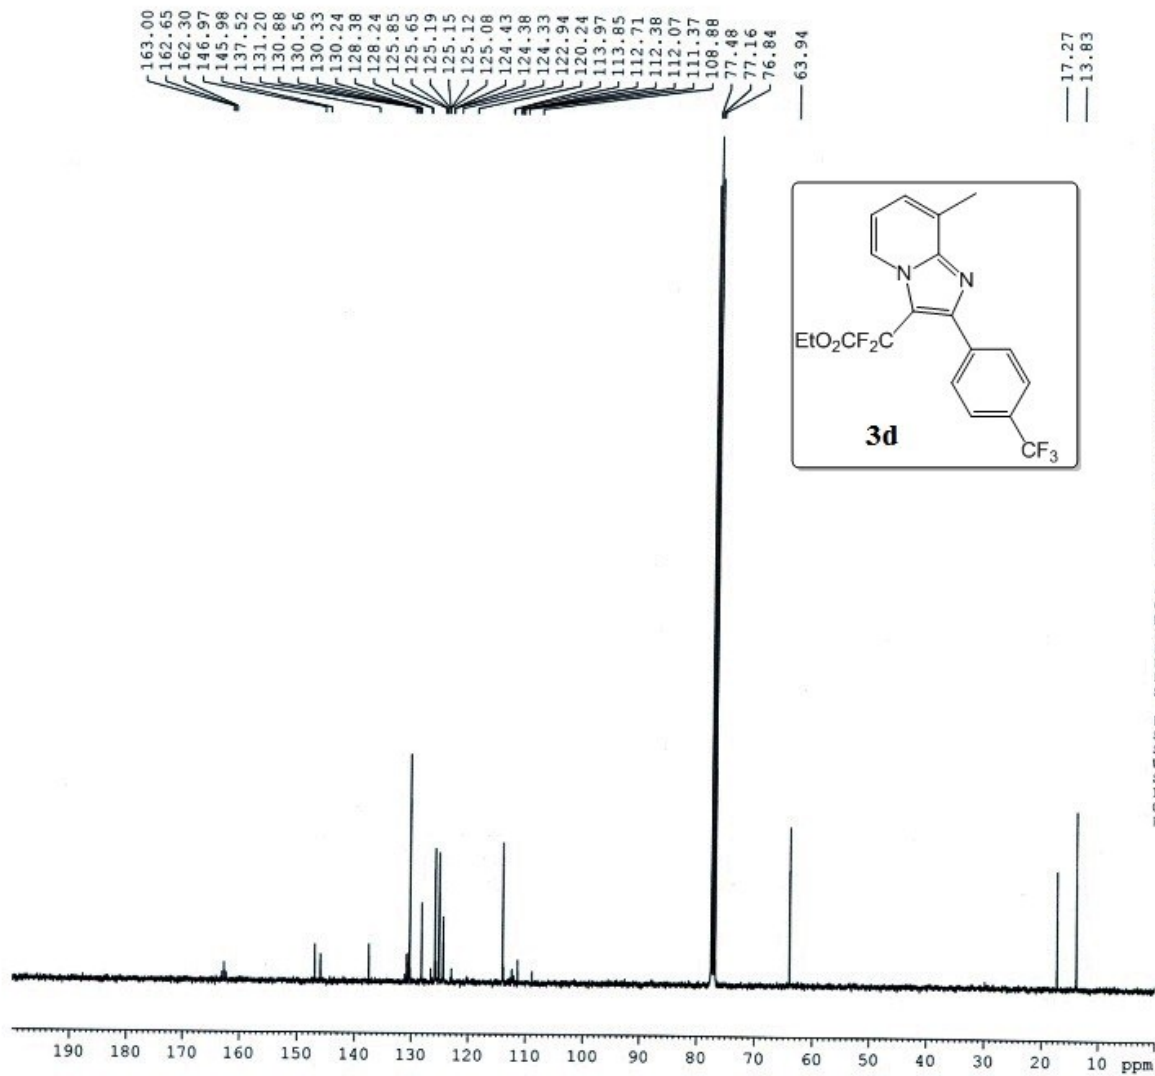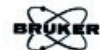

Current Data Parameters  
 NAME Dr. A HAJRA 2015  
 EXPNO 456  
 PROCNO 1

F2 - Acquisition Parameters  
 Date\_ 20150729  
 Time 14.10  
 INSTRUM spect  
 PROBRD 5 mm PABBO BB/  
 PULPROG zgpg30  
 TD 32768  
 SOLVENT CDCl3  
 NS 2048  
 DS 2  
 SWH 24038.461 Hz  
 FIDRES 0.733596 Hz  
 AQ 0.6816244 sec  
 RG 106.66  
 DW 20.800 usec  
 DE 6.50 usec  
 TE 297.7 K  
 D1 2.00000000 sec  
 D11 0.03000000 sec  
 TD0 1

----- CHANNEL f1 -----  
 NUC1 13C  
 P1 8.90 usec  
 PLW1 54.00000000 W  
 SFO1 100.6278588 MHz

----- CHANNEL f2 -----  
 CPDPRG2 waltz16  
 NUC2 1H  
 PCPD2 80.00 usec  
 PLW2 12.00000000 W  
 PLW12 0.40792999 W  
 PLW13 0.26107001 W  
 SFO2 400.1516006 MHz

F2 - Processing parameters  
 SI 16384  
 SF 100.6177836 MHz  
 WDW EM  
 SSB 0  
 LB 1.00 Hz  
 GB 0  
 PC 1.40

F19 1H coupled VBPM-459 I

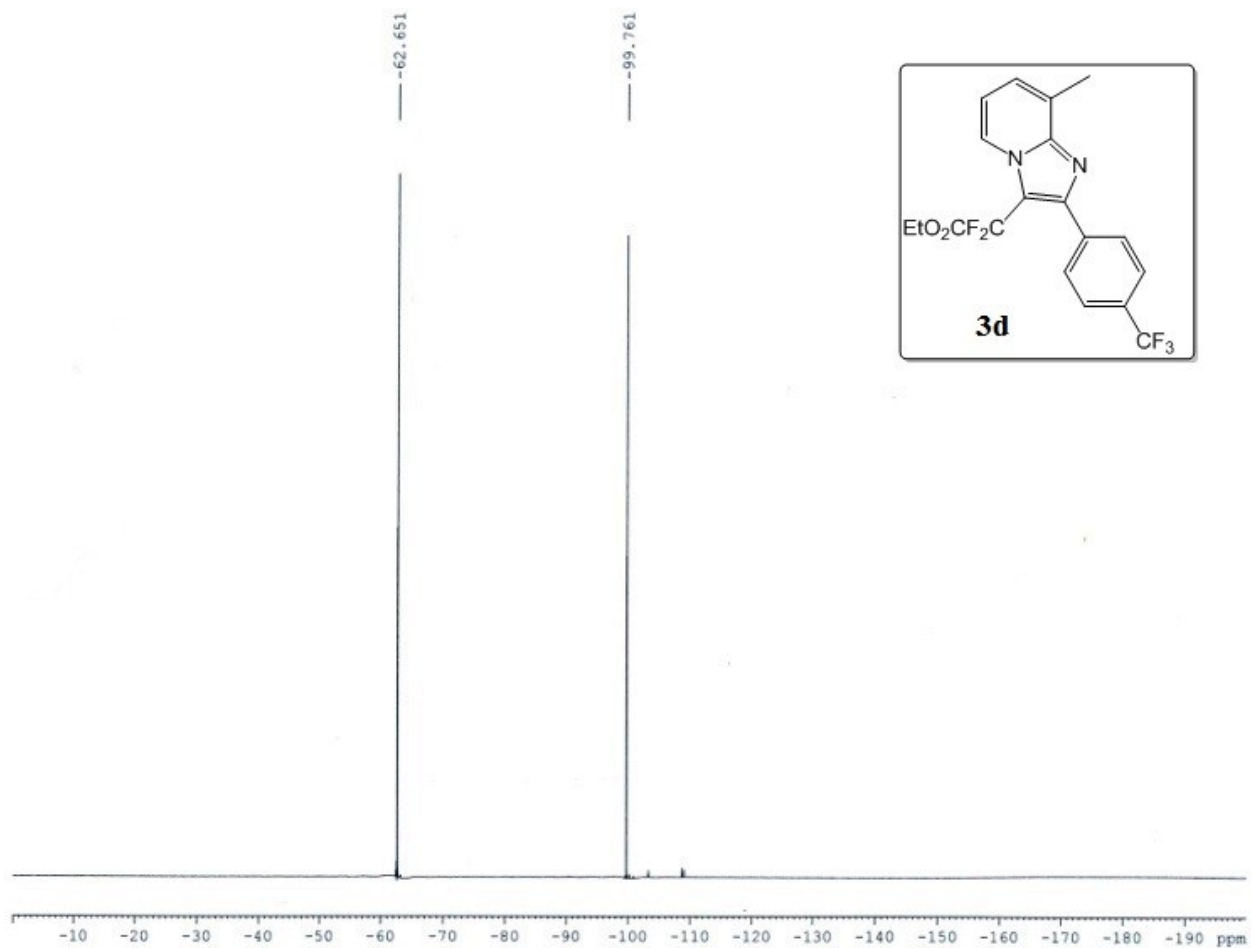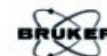

Current Data Parameters  
NAME Dr. A HAJRA 2015  
EXPNO 455  
PROCNO 1

F2 - Acquisition Parameters  
Date\_ 20150729  
Time 12.26  
INSTRUM spect  
PROBHD 5 mm PABBO BB/  
PULPROG zgpg30  
TD 32768  
SOLVENT CDCl3  
NS 16  
DS 2  
SWH 89285.711 Hz  
FIDRES 2.724784 Hz  
AQ 0.1835508 sec  
RG 106.66  
DW 5.600 usec  
DE 6.50 usec  
TE 294.2 K  
D1 1.00000000 sec  
TD0 1

----- CHANNEL f1 -----  
NUC1 19F  
P1 12.50 usec  
PLW1 20.00000000 W  
SFO1 376.4795333 MHz

F2 - Processing parameters  
SI 16384  
SF 376.5171850 MHz  
WDW EM  
SSB 0  
LB 0.30 Hz  
GB 0  
PC 1.00

8.364  
8.347  
7.437  
7.434  
7.428  
7.421  
7.414  
7.412  
7.409  
7.260  
7.126  
7.108  
7.099  
7.090  
7.087  
7.078  
6.846  
6.829  
6.811

4.163  
4.145  
4.127  
4.109

2.640

1.220  
1.202  
1.184

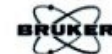

Current Data Parameters  
NAME Dr. A HAJRA 2015  
EXPNO 442  
PROCNO 1

F2 - Acquisition Parameters  
Date\_ 20150727  
Time\_ 10.38  
INSTRUM spect  
PROBHD 5 mm PABBO BB/  
PULPROG zg30  
TD 32768  
SOLVENT CDCl3  
NS 24  
DS 1  
SWH 8223.685 Hz  
FIDRES 0.250967 Hz  
AQ 1.9923444 sec  
RG 67.81  
DW 60.800 usec  
DE 6.50 usec  
TE 295.5 K  
D1 1.00000000 sec  
TDO 1

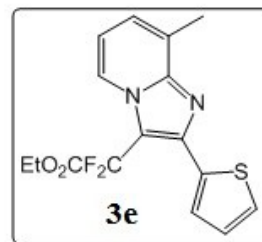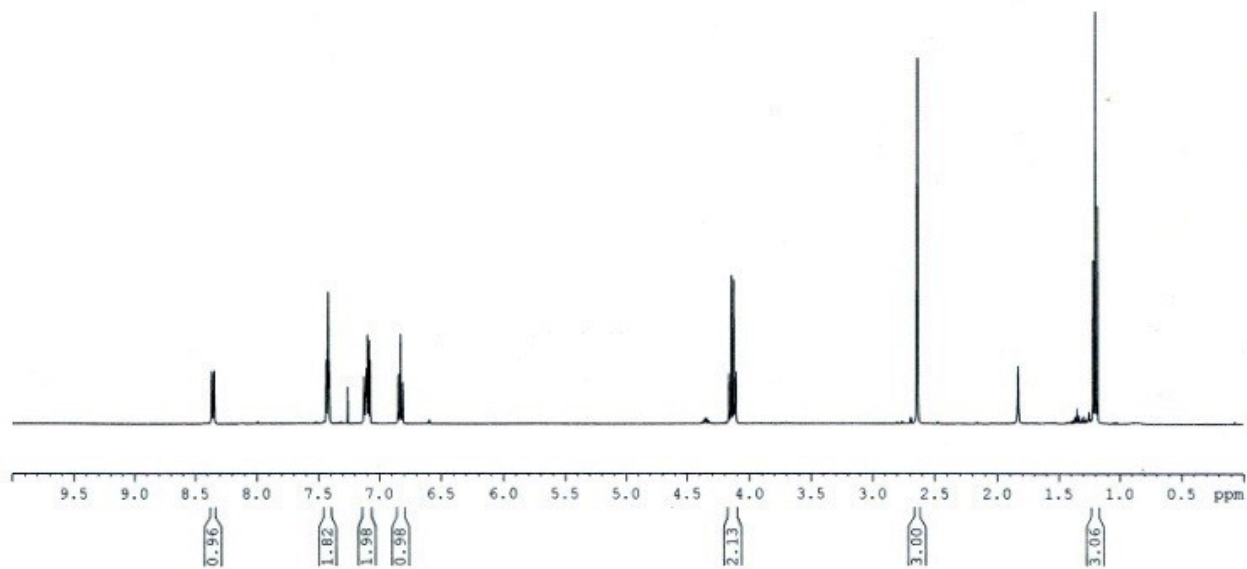

===== CHANNEL f1 =====  
NUC1 1H  
P1 14.75 usec  
PLW1 11.99499989 W  
SFO1 400.1524711 MHz

F2 - Processing parameters  
SI 16384  
SF 400.1500090 MHz  
WDW EM  
SSB 0  
LB 0.30 Hz  
GB 0  
PC 1.00



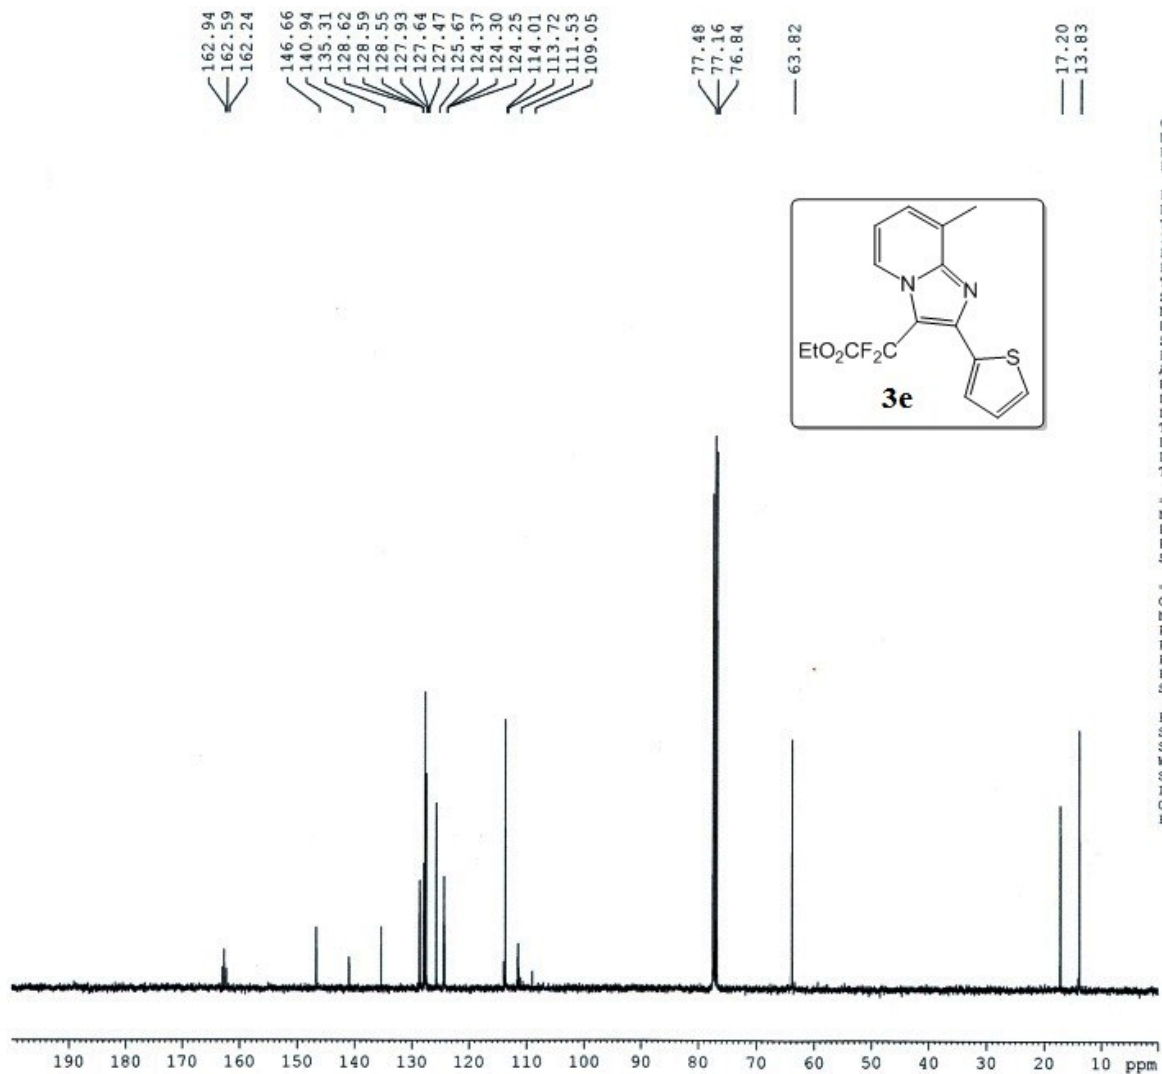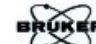

Current Data Parameters  
NAME Dr. A HAJRA 2015  
EXNO 444  
PROCNO 1

F2 - Acquisition Parameters  
Date\_ 20150727  
Time\_ 11.06  
INSTRUM spect  
PROBHD 5 mm PABBO BB/  
PULPROG zgpg30  
TD 32768  
SOLVENT CDCl<sub>3</sub>  
NS 512  
DS 2  
SMH 24038.461 Hz  
FIDRES 0.733596 Hz  
AQ 0.6816244 sec  
RG 67.81  
DM 20.800 usec  
DE 6.50 usec  
TE 296.7 K  
D1 2.00000000 sec  
D11 0.03000000 sec  
TDO 1

----- CHANNEL f1 -----  
NUC1 13C  
P1 8.90 usec  
PLW1 54.00000000 W  
SFO1 100.6278588 MHz

----- CHANNEL f2 -----  
CPDPRG2 waltz16  
NUC2 1H  
PCPD2 80.00 usec  
PLW2 12.00000000 W  
PLW12 0.40792999 W  
PLW13 0.26107001 W  
SFO2 400.1516006 MHz

F2 - Processing parameters  
SI 16384  
SF 100.6177865 MHz  
WDW EM  
SSB 0  
LB 1.00 Hz  
GB 0  
PC 1.40

-99.89

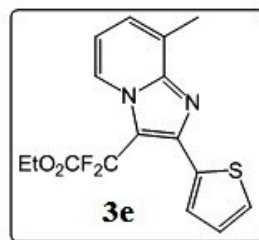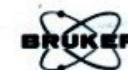

Current Data Parameters  
NAME Dr. A HAJRA 2015  
EXPNO 443  
PROCNO 1

F2 - Acquisition Parameters  
Date\_ 20150727  
Time 10.40  
INSTRUM spect  
PROBHD 5 mm PABBO BB/  
PULPROG zgfglqn  
TD 32768  
SOLVENT CDC13  
NS 4  
DS 2  
SWH 89285.711 Hz  
FIDRES 2.724784 Hz  
AQ 0.1835508 sec  
RG 67.81  
DW 5.600 usec  
DE 6.50 usec  
TE 295.4 K  
D1 1.00000000 sec  
TD0 1

----- CHANNEL f1 -----  
NUC1 19F  
P1 12.75 usec  
PLW1 20.00000000 W  
SF01 376.4795333 MHz

F2 - Processing parameters  
SI 16384  
SF 376.5171850 MHz  
WDW EM  
SSB 0  
LB 0.30 Hz  
GB 0  
PC 1.00

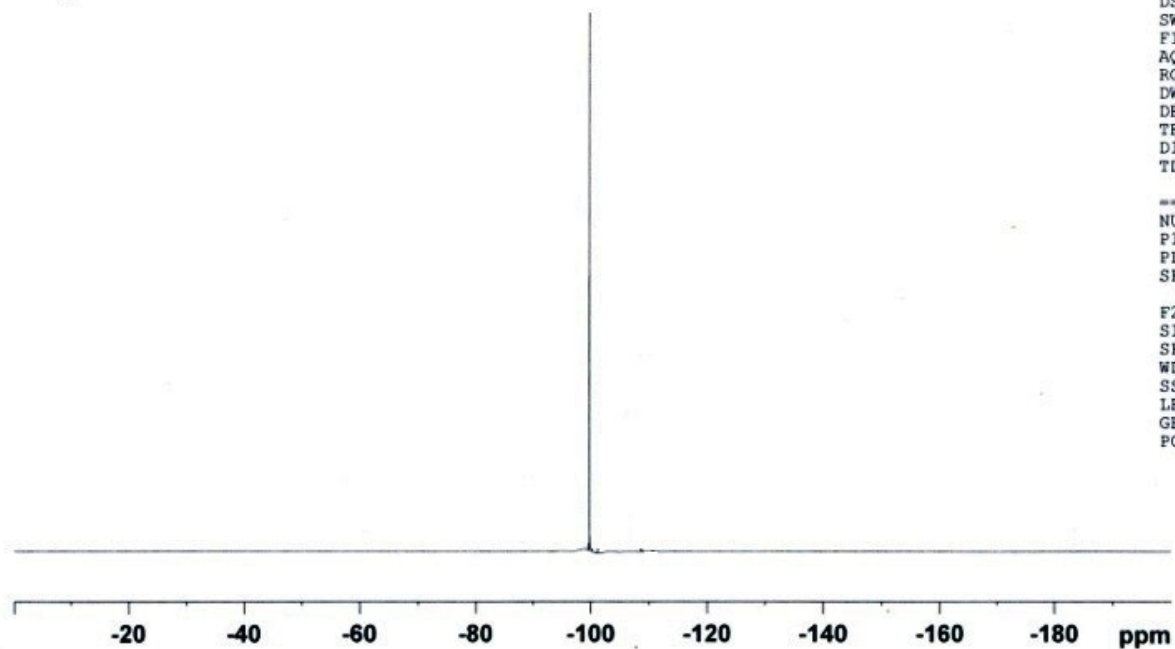

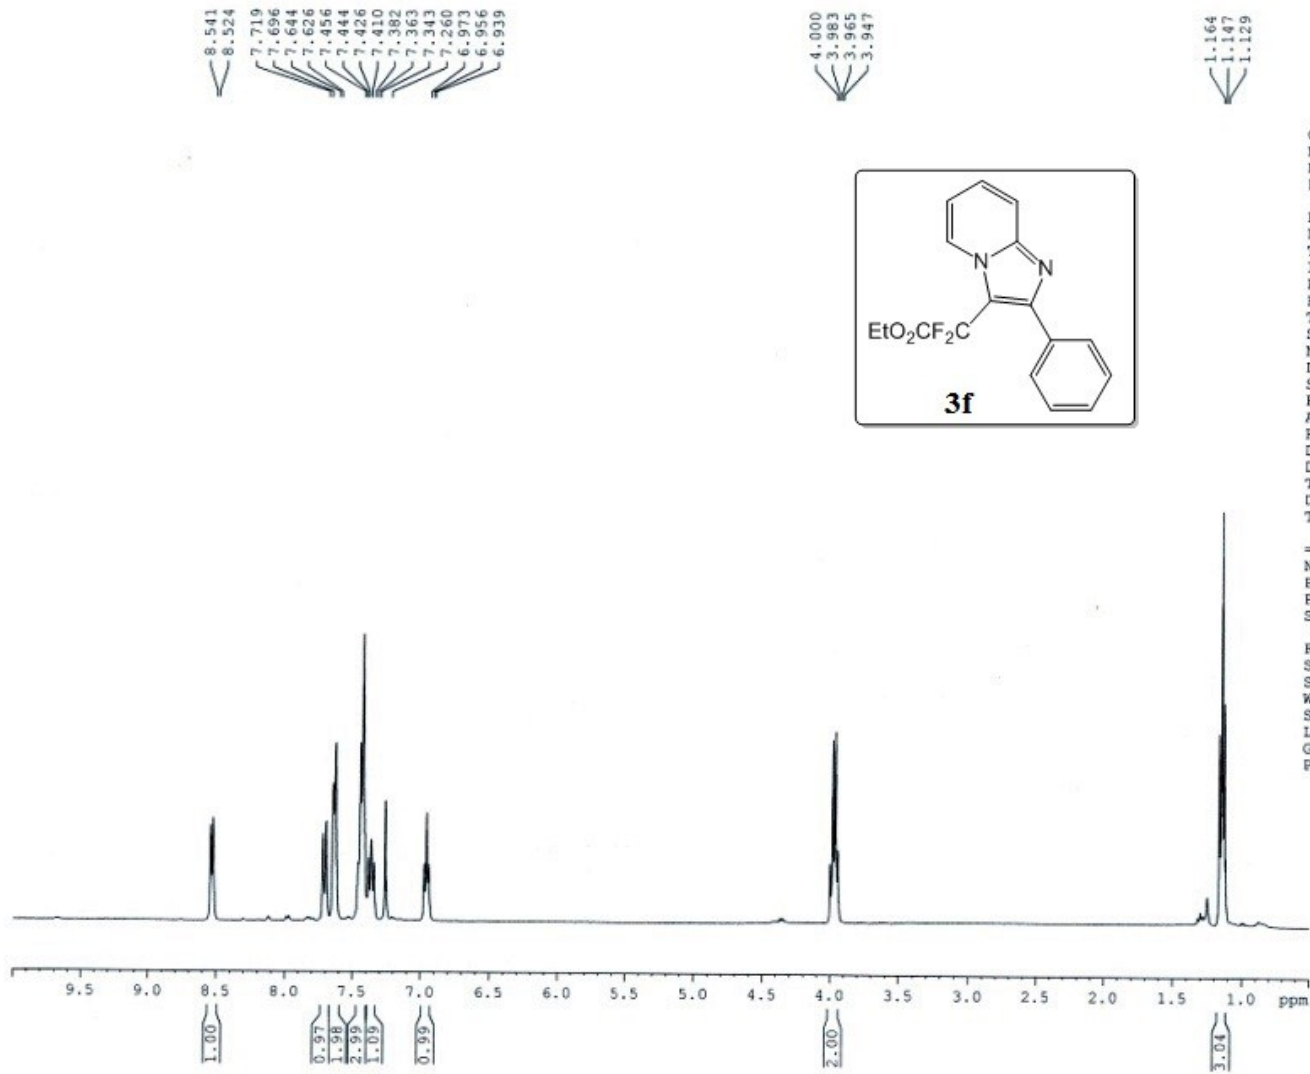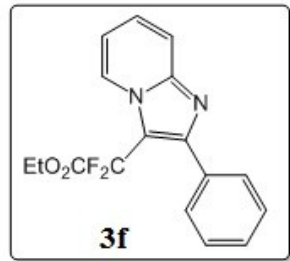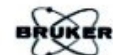

Current Data Parameters  
 NAME Dr. A HAJRA 2015  
 EXPNO 289  
 PROCNO 1

F2 - Acquisition Parameters  
 Date\_ 20150619  
 Time\_ 12.46  
 INSTRUM spect  
 PROBHD 5 mm PABBO BB/  
 FULPROG zg30  
 TD 32768  
 SOLVENT CDCl3  
 NS 32  
 DS 1  
 SWH 8223.685 Hz  
 FIDRES 0.250967 Hz  
 AQ 1.9923444 sec  
 RG 135.7  
 DW 60.800 usec  
 DE 6.50 usec  
 TE 297.1 K  
 D1 1.00000000 sec  
 TDO 1

----- CHANNEL f1 -----  
 NUC1 1H  
 P1 14.75 usec  
 PLW1 11.99499989 W  
 SF01 400.1524711 MHz

F2 - Processing parameters  
 SI 16384  
 SF 400.1500097 MHz  
 WDN EM  
 SSB 0  
 LB 0.30 Hz  
 GB 0  
 PC 1.00

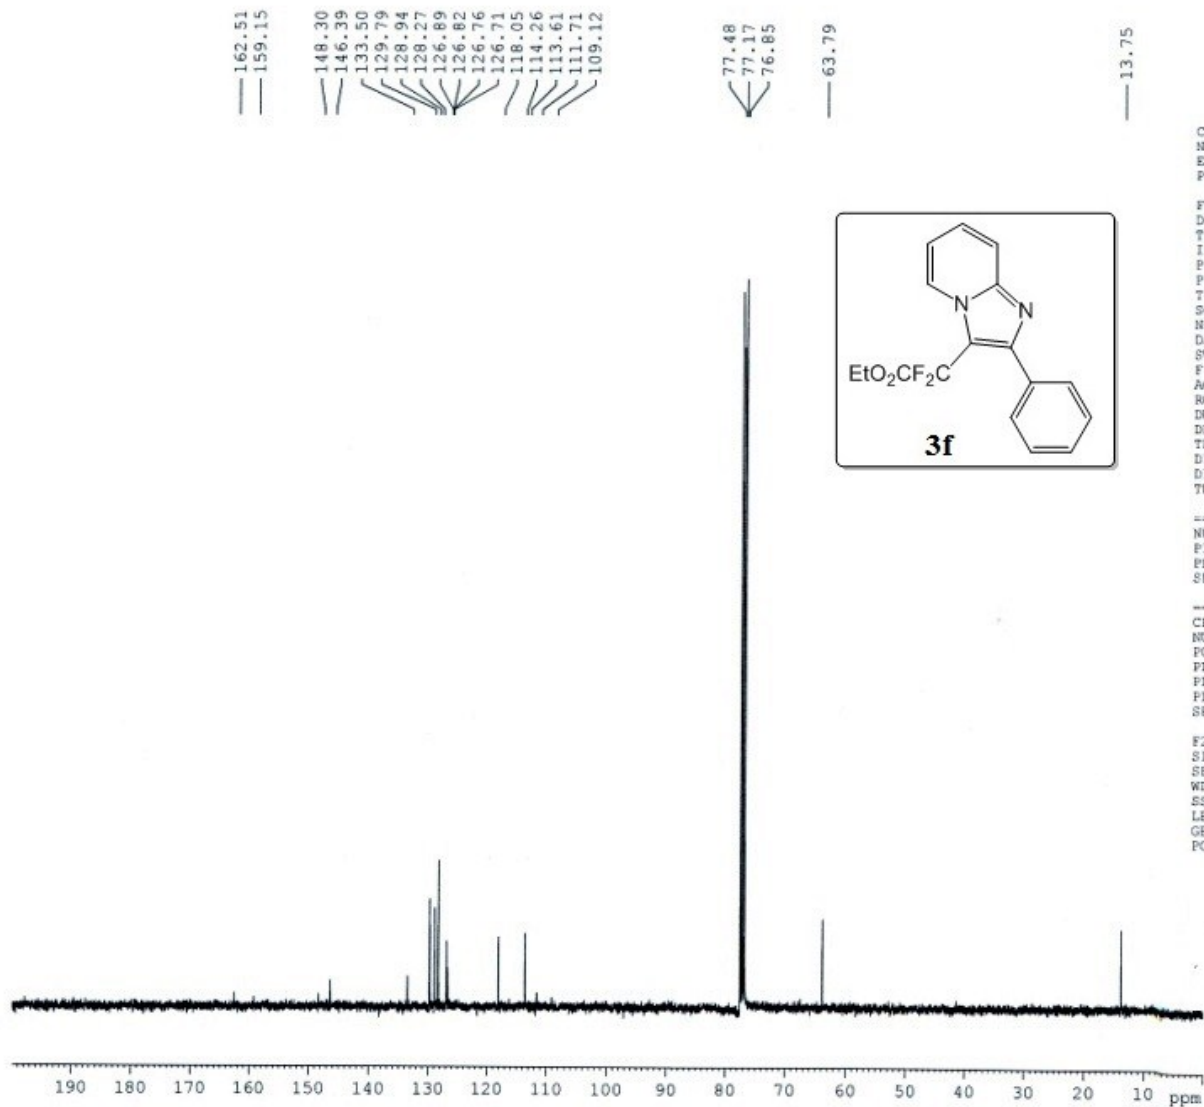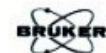

Current Data Parameters  
 NAME Dr. A SAJRA 2015  
 EXPNO 290  
 PROCNO 1

F2 - Acquisition Parameters  
 Date\_ 20150619  
 Time 13.27  
 INSTRUM spect  
 PROBHD 5 mm PABBO BB/  
 PULPROG zgpg30  
 TD 32768  
 SOLVENT CDC13  
 NS 800  
 DS 2  
 SWH 24038.461 Hz  
 FIDRES 0.733596 Hz  
 AQ 0.6816244 sec  
 RG 87.66  
 DW 20.800 usec  
 DE 6.50 usec  
 TE 298.5 K  
 D1 2.00000000 sec  
 D11 0.03000000 sec  
 TDO 1

----- CHANNEL f1 -----  
 NUC1 13C  
 P1 8.90 usec  
 PLW1 54.00000000 W  
 SFO1 100.6278588 MHz

----- CHANNEL f2 -----  
 CPDPRG2 waltz16  
 NUC2 1H  
 PCPD2 80.00 usec  
 PLW2 12.00000000 W  
 PLW12 0.40792999 W  
 PLW13 0.26107001 W  
 SFO2 400.1516006 MHz

F2 - Processing parameters  
 SI 16384  
 SF 100.6177823 MHz  
 WDW EM  
 SSB 0  
 LB 1.00 Hz  
 GB 0  
 PC 1.40

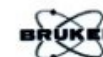

Current Data Parameters  
NAME Dr. A HAJRA 2015  
EXPNO 291  
PROCNO 1

F2 - Acquisition Parameters  
Date\_ 20150619  
Time\_ 12.49  
INSTRUM spect  
PROBHD 5 mm PABBO BB/  
PULPROG zgflqn  
TD 32768  
SOLVENT CDCl3  
NS 2  
DS 2  
SWH 89285.711 Hz  
FIDRES 2.724784 Hz  
AQ 0.1835508 sec  
RG 87.66  
DW 5.600 usec  
DE 6.50 usec  
TE 297.1 K  
D1 1.00000000 sec  
TD0 1

===== CHANNEL f1 =====  
NUC1 19F  
P1 12.50 usec  
PLW1 20.00000000 W  
SFO1 376.4795333 MHz

F2 - Processing parameters  
SI 16384  
SF 376.5171850 MHz  
WDW EM  
SSB 0  
LB 0.30 Hz  
GB 0  
PC 1.00

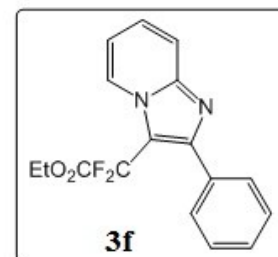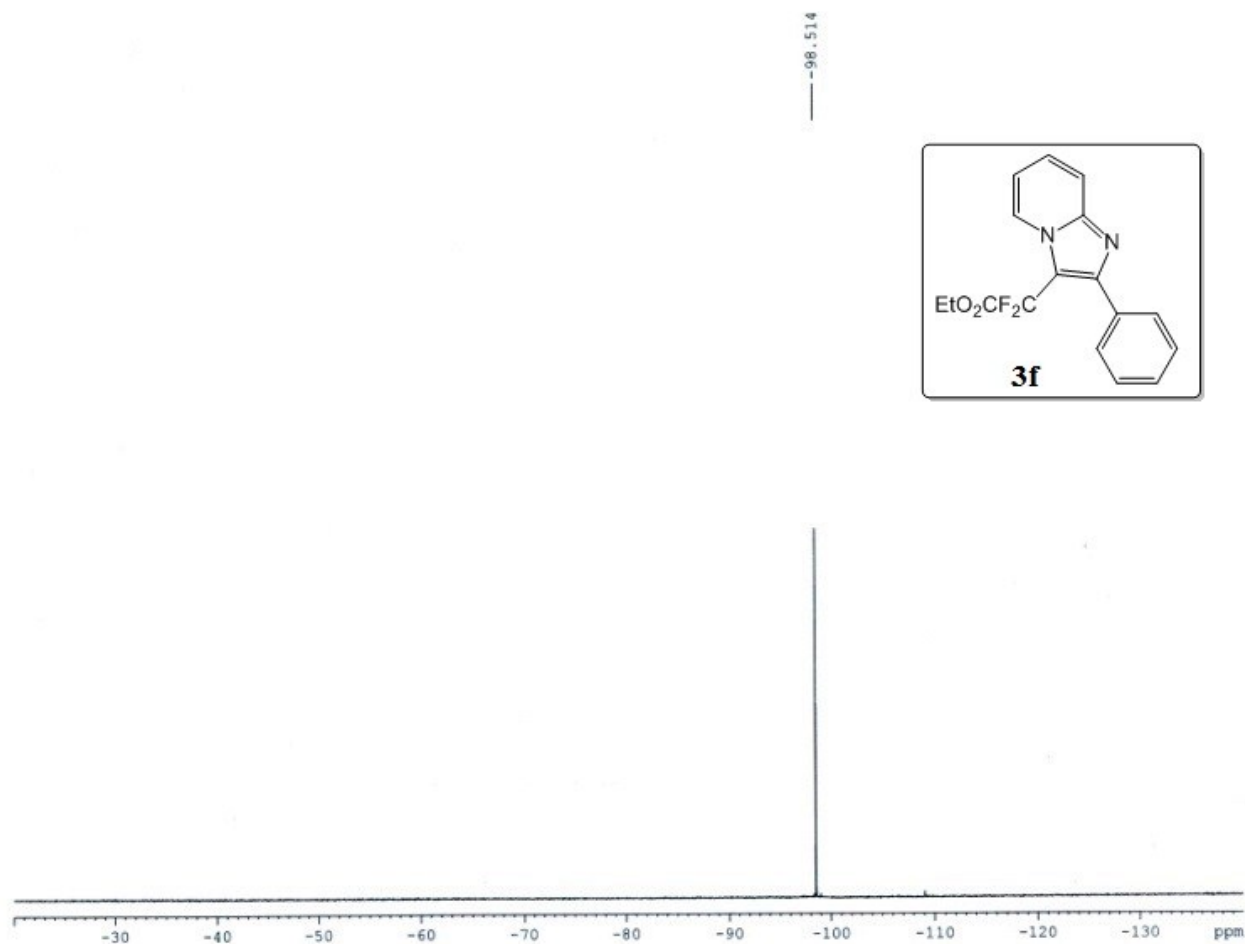

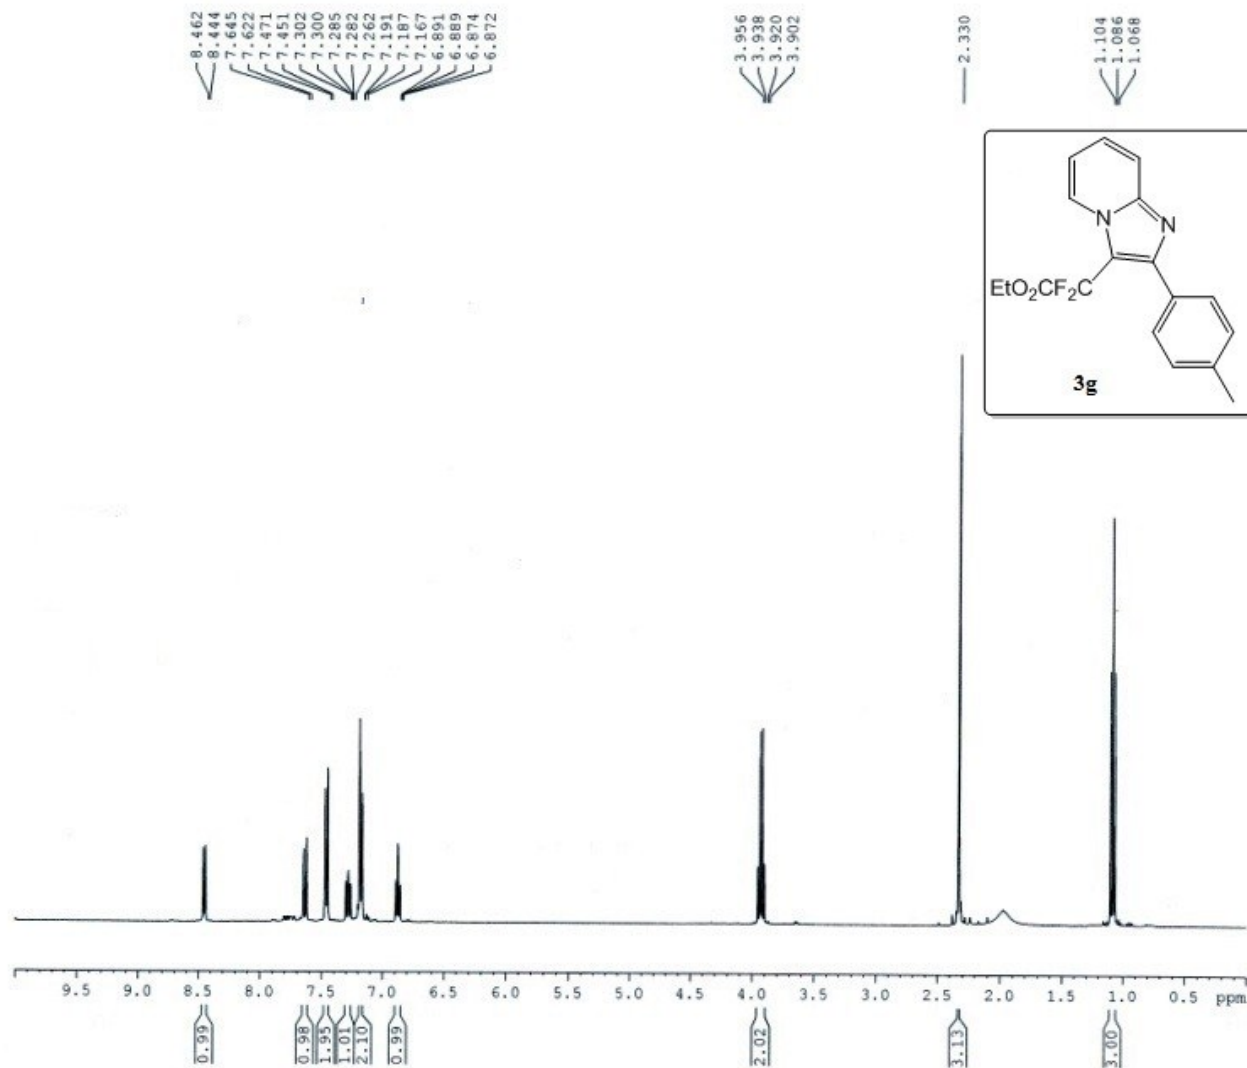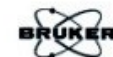

Current Data Parameters  
 NAME Dr. A HAJRA 2015  
 EXPNO 247  
 PROCNO 1

F2 - Acquisition Parameters  
 Date\_ 20150529  
 Time 20.12  
 INSTRUM spect  
 PROBHD 5 mm PABBO BB/  
 PULPROG zg30  
 TD 32768  
 SOLVENT CDCl3  
 NS 24  
 DS 2  
 SWH 8223.685 Hz  
 FIDRES 0.250967 Hz  
 AQ 1.9923444 sec  
 RG 120.16  
 DW 60.800 usec  
 DE 6.50 usec  
 TE 295.4 K  
 D1 1.00000000 sec  
 TD0 1

----- CHANNEL f1 -----  
 NUC1 1H  
 P1 14.75 usec  
 PLW1 11.99499989 W  
 SFO1 400.1524711 MHz

F2 - Processing parameters  
 SI 16384  
 SF 400.1500364 MHz  
 WDM EM  
 SSB 0  
 LB 0.30 Hz  
 GB 0  
 PC 1.00

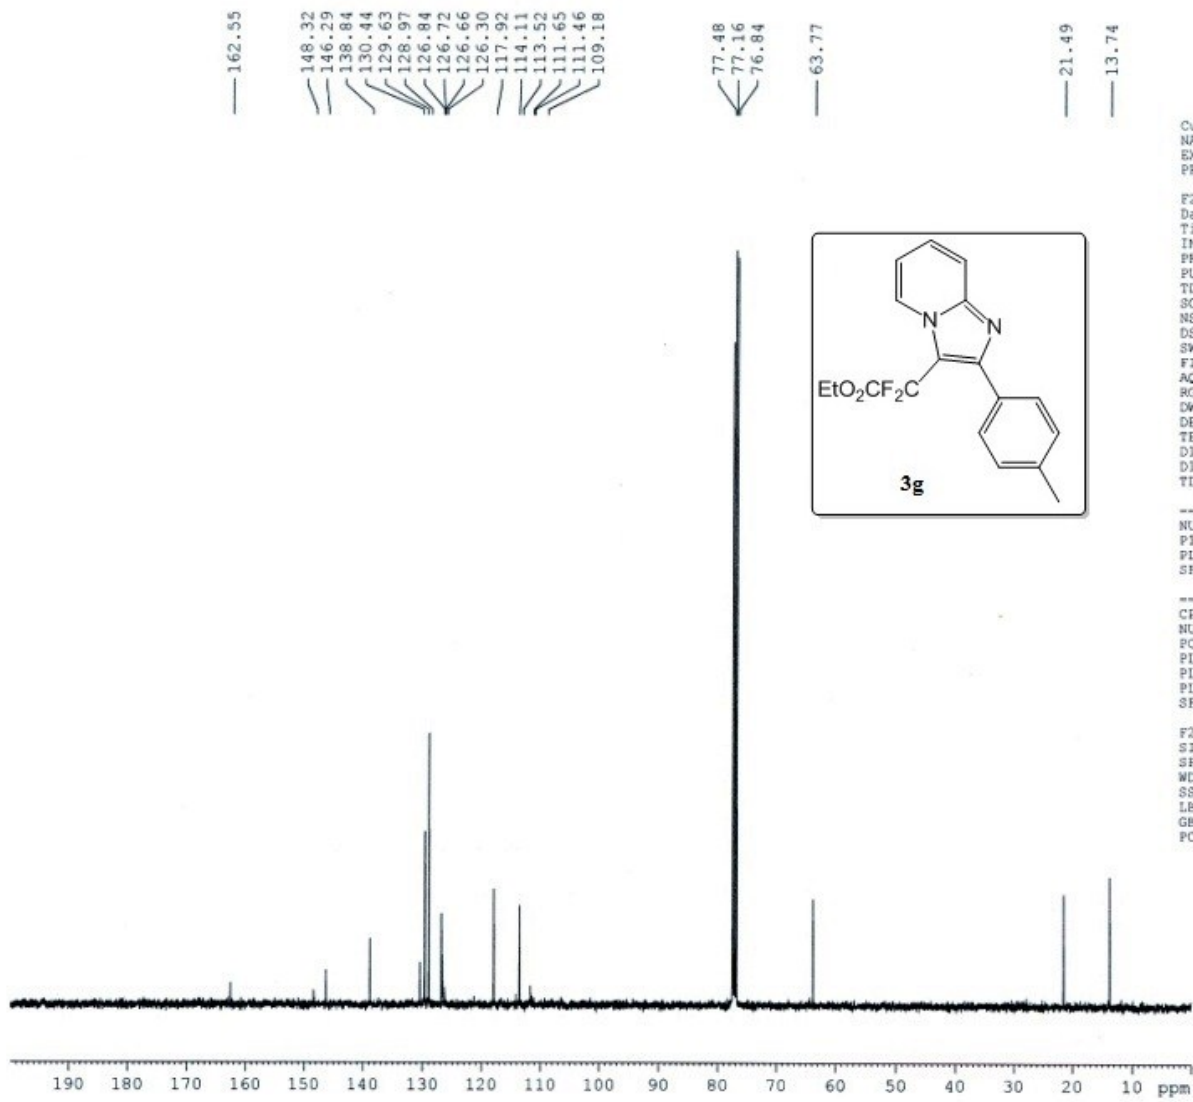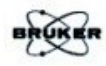

Current Data Parameters  
 NAME Dr. A HAJRA 2015  
 EXPNO 249  
 PROCNO 1

F2 - Acquisition Parameters  
 Date\_ 20150530  
 Time 11.57  
 INSTRUM spect  
 PROBHD 5 mm PABBO BB/  
 PULPROG zgpg30  
 TD 32768  
 SOLVENT CDC13  
 NS 800  
 DS 2  
 SWH 24038.461 Hz  
 FIDRES 0.733596 Hz  
 AQ 0.4816244 sec  
 RG 87.66  
 DW 20.800 usec  
 DE 6.50 usec  
 TE 295.0 K  
 D1 2.00000000 sec  
 D11 0.03000000 sec  
 TDO 1

----- CHANNEL f1 -----  
 NUC1 13C  
 P1 8.90 usec  
 PLW1 54.00000000 W  
 SFO1 100.6278588 MHz

----- CHANNEL f2 -----  
 CPDPRG2 waltz16  
 NUC2 1H  
 PCPD2 80.00 usec  
 PLW2 12.00000000 W  
 PLW12 0.40792999 W  
 PLW13 0.26107001 W  
 SFO2 400.1516006 MHz

F2 - Processing parameters  
 SI 16384  
 SF 100.6177851 MHz  
 WDW EM  
 SSB 0  
 LB 1.00 Hz  
 GB 0  
 PC 1.40

98.66

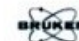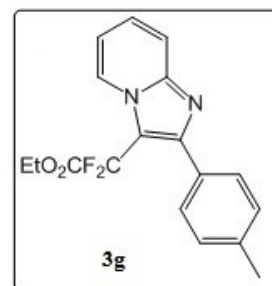

Current Data Parameters  
NAME Dr. A HAJRA 2015  
EXPNO 248  
PROCNO 1

F2 - Acquisition Parameters  
Date\_ 20150529  
Time 20.14  
INSTRUM spect  
PROBHD 5 mm F4BBO BB/  
PULPROG zgpg30  
TD 32768  
SOLVENT CDCl3  
NS 16  
DS 2  
SWH 89285.711 Hz  
FIDRES 2.724784 Hz  
AQ 0.1835508 sec  
RG 120.16  
DW 5.600 usec  
DE 6.50 usec  
TE 295.3 K  
D1 1.00000000 sec  
TDO 1

----- CHANNEL f1 -----  
NUC1 19F  
P1 12.50 usec  
PL1 20.0000000 W  
SFO1 376.4795333 MHz

F2 - Processing parameters  
SI 16384  
SF 376.5171850 MHz  
WDW EM  
SSB 0  
LB 0.30 Hz  
GB 0  
PC 1.00

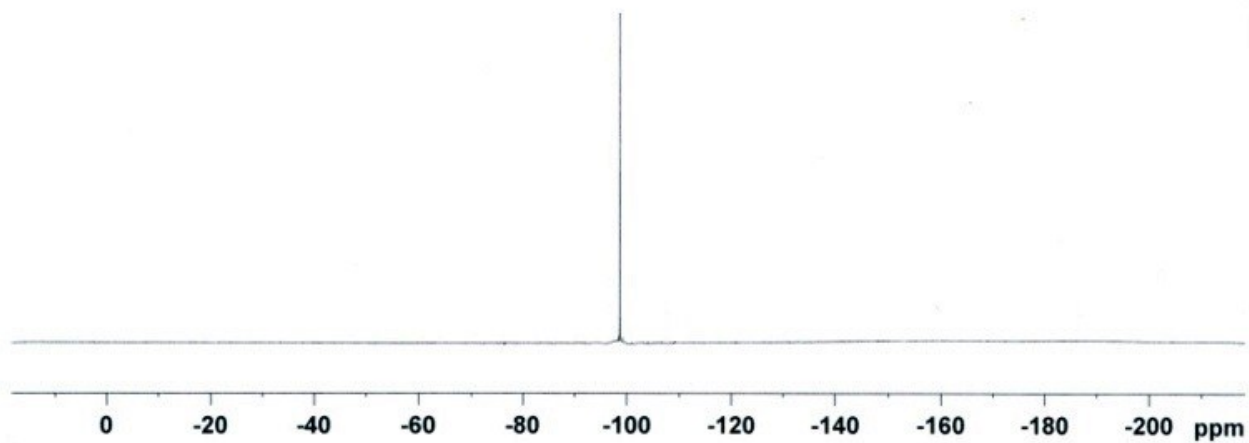



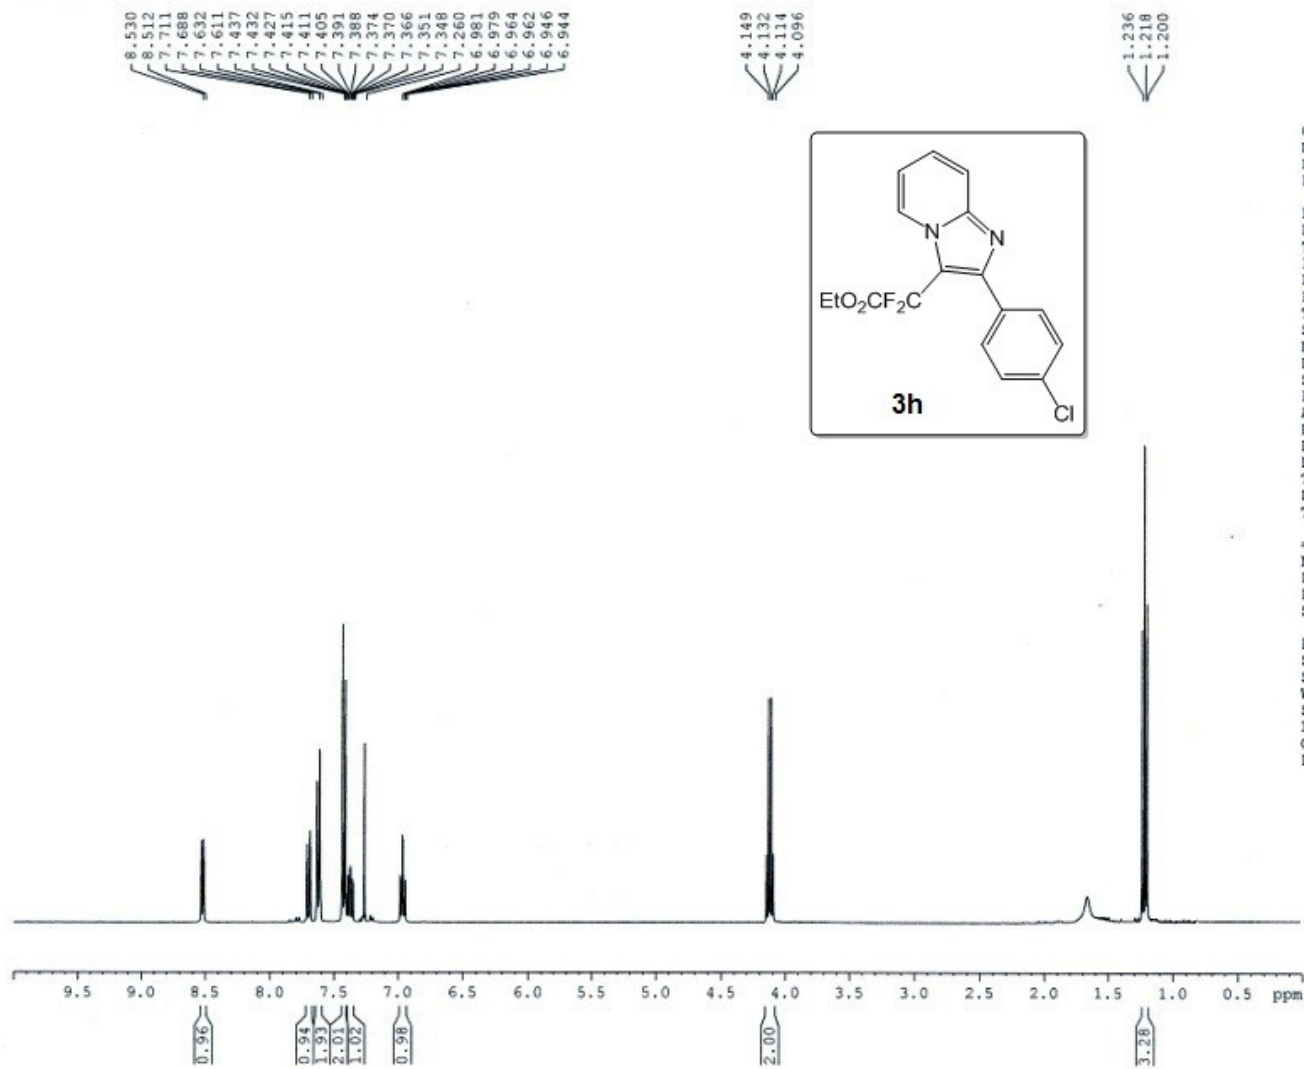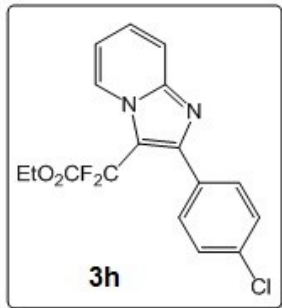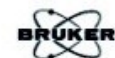

Current Data Parameters  
 NAME Dr. A HAJRA 2015  
 EXPNO 236  
 PROCNO 1

F2 - Acquisition Parameters  
 Date\_ 20150528  
 Time 14.35  
 INSTRUM spect  
 PROBHD 5 mm PABBO BB/  
 PULPROG zg30  
 TD 32768  
 SOLVENT CDC13  
 NS 32  
 DS 2  
 SWH 8223.685 Hz  
 FIDRES 0.250967 Hz  
 AQ 1.9923444 sec  
 RG 135.7  
 DW 60.800 usec  
 DE 6.50 usec  
 TE 296.7 K  
 D1 1.00000000 sec  
 TDO 1

----- CHANNEL f1 -----  
 NUC1 1H  
 P1 14.75 usec  
 PLW1 11.99499989 W  
 SFO1 400.1524711 MHz

F2 - Processing parameters  
 SI 16384  
 SF 400.1500090 MHz  
 WDW EM  
 SSB 0  
 LB 0.30 Hz  
 GB 0  
 PC 1.00

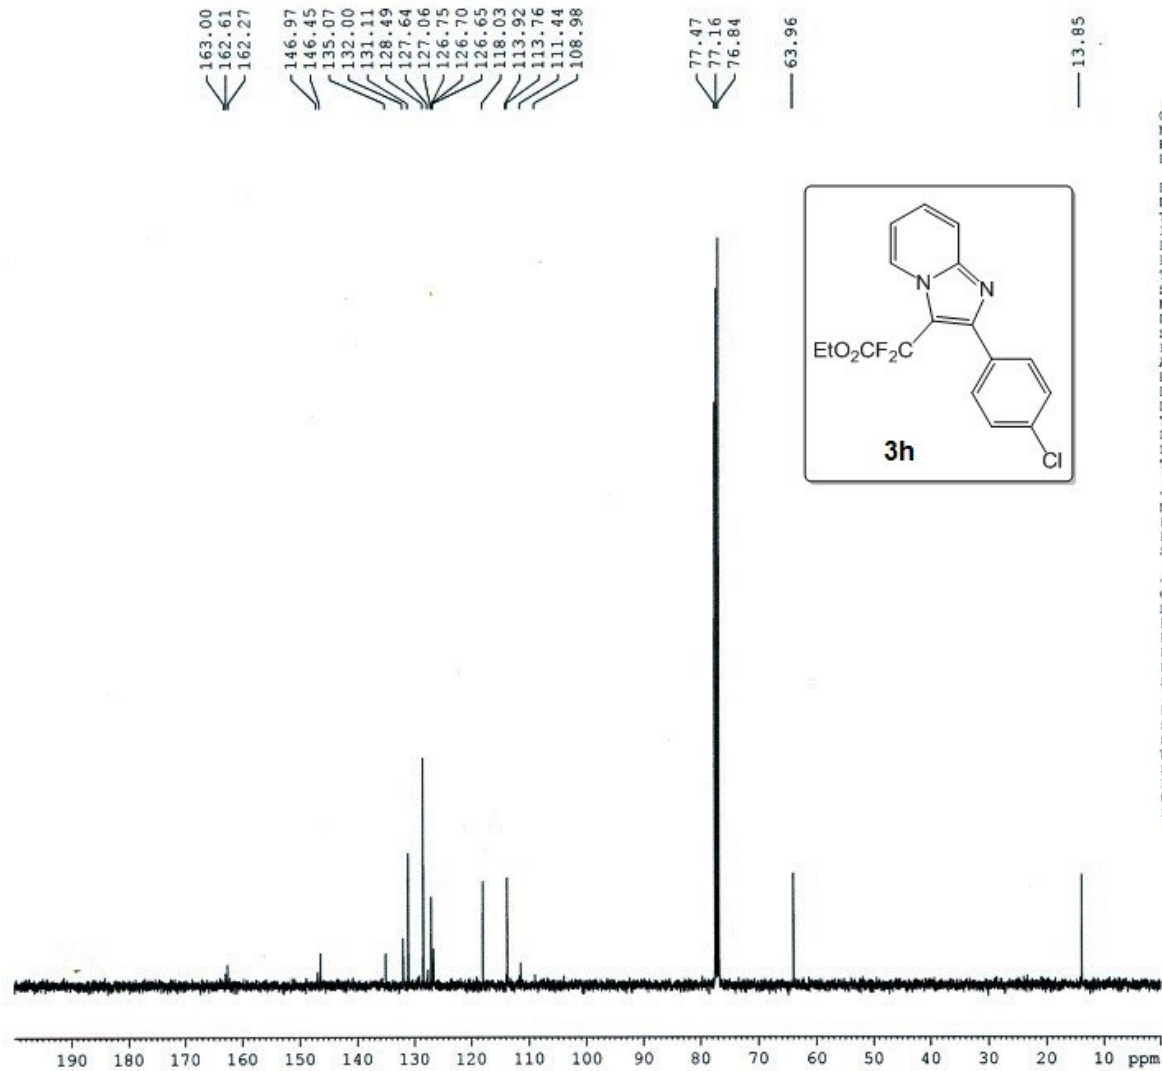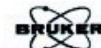

Current Data Parameters  
 NAME Dr. A HAJRA 2015  
 EXPNO 237  
 PROCNO 1

F2 - Acquisition Parameters  
 Date 20150528  
 Time 15.05  
 INSTRUM spect  
 PROBHD 5 mm PABBO BB/  
 PULPROG zgpg30  
 TD 32768  
 SOLVENT CDCl3  
 NS 512  
 DS 2  
 SWH 24038.461 Hz  
 FIDRES 0.733596 Hz  
 AQ 0.6816244 sec  
 RG 135.7  
 DW 20.800 usec  
 DE 6.50 usec  
 TE 297.4 K  
 D1 2.00000000 sec  
 D11 0.03000000 sec  
 TD0 1

----- CHANNEL f1 -----  
 NUC1 13C  
 P1 8.90 usec  
 PLW1 54.00000000 W  
 SFO1 100.6278588 MHz

----- CHANNEL f2 -----  
 CPDPRG2 waltz16  
 NUC2 1H  
 PCPD2 80.00 usec  
 PLW2 12.00000000 W  
 PLW12 0.40792999 W  
 PLW13 0.26107001 W  
 SFO2 400.1516006 MHz

F2 - Processing parameters  
 SI 16384  
 SF 100.6177836 MHz  
 WDW EM  
 SSB 0  
 LB 1.00 Hz  
 GB 0  
 PC 1.40

99.568

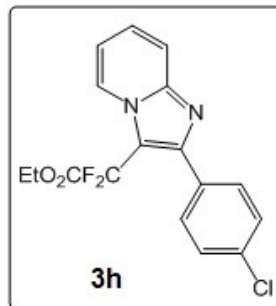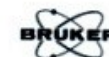

Current Data Parameters  
NAME Dr. A HAJRA 2015  
EXPNO 238  
PROCNO 1

F2 - Acquisition Parameters  
Date\_ 20150528  
Time\_ 16.47  
INSTRUM spect  
PROBHD 5 mm PABBO BB/  
PULPROG zgpg30  
TD 32768  
SOLVENT CDCl3  
NS 4  
DS 2  
SWH 89285.711 Hz  
FIDRES 2.724784 Hz  
AQ 0.1835508 sec  
RG 87.66  
DW 5.600 usec  
DE 6.50 usec  
TE 295.4 K  
D1 1.00000000 sec  
TD0 1

----- CHANNEL f1 -----  
NUC1 19F  
P1 12.50 usec  
PLW1 20.00000000 W  
SF01 376.4795333 MHz

F2 - Processing parameters  
SI 16384  
SF 376.5171850 MHz  
WDW EM  
SSB 0  
LB 0.30 Hz  
GB 0  
PC 1.00

-30 -40 -50 -60 -70 -80 -90 -100 -110 -120 -130 -140 -150 ppm

8.542  
8.524  
7.857  
7.855  
7.835  
7.753  
7.749  
7.736  
7.732  
7.707  
7.426  
7.423  
7.409  
7.406  
7.401  
7.386  
7.383  
7.260  
7.019  
7.016  
7.001  
6.998  
6.984  
6.981

4.252  
4.234  
4.216  
4.198

1.288  
1.271  
1.253

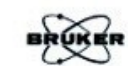

Current Data Parameters  
NAME Dr. A HAJRA 2015  
EXPNO 296  
PROCNO 1

F2 - Acquisition Parameters  
Date\_ 20150620  
Time 12.39  
INSTRUM spect  
PROBHD 5 mm PABBO BB/  
PULPROG zg30  
TD 32768  
SOLVENT CDCl3  
NS 32  
DS 1  
SWH 8223.685 Hz  
FIDRES 0.250967 Hz  
AQ 1.9923444 sec  
RG 87.66  
DN 60.800 usec  
DE 6.50 usec  
TE 296.0 K  
D1 1.0000000 sec  
TD0 1

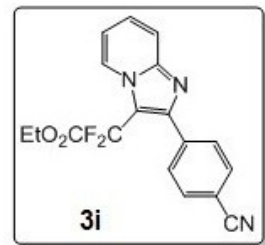

===== CHANNEL f1 =====  
NUC1 1H  
P1 14.75 usec  
PLW1 11.99499989 W  
SFO1 400.1524711 MHz

F2 - Processing parameters  
SI 16384  
SF 400.1500090 MHz  
WDW EM  
SSB 0  
LB 0.30 Hz  
GB 0  
PC 1.00

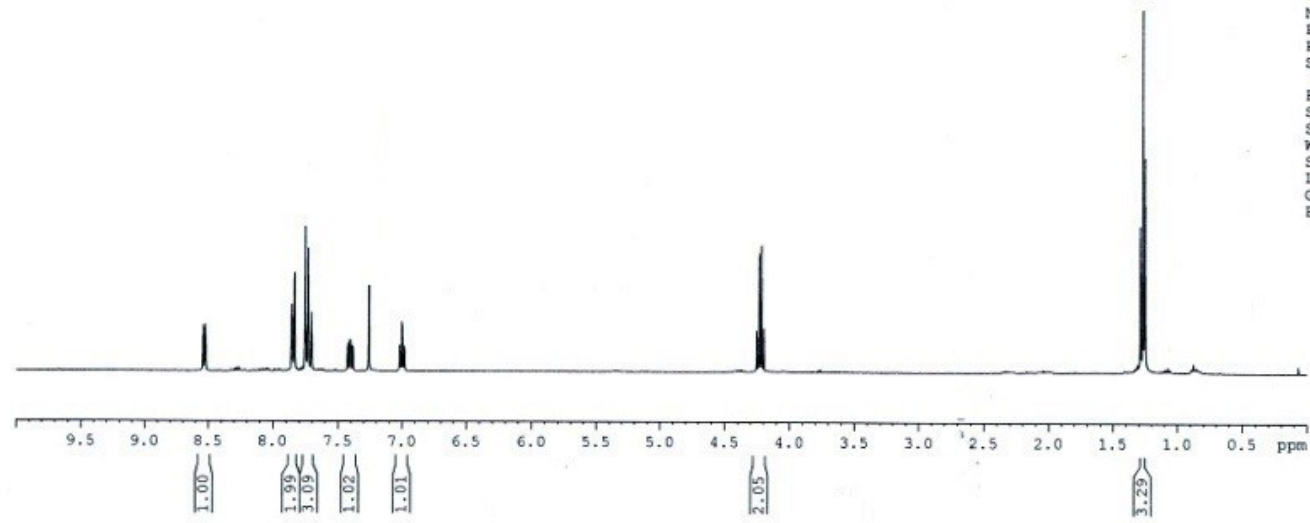

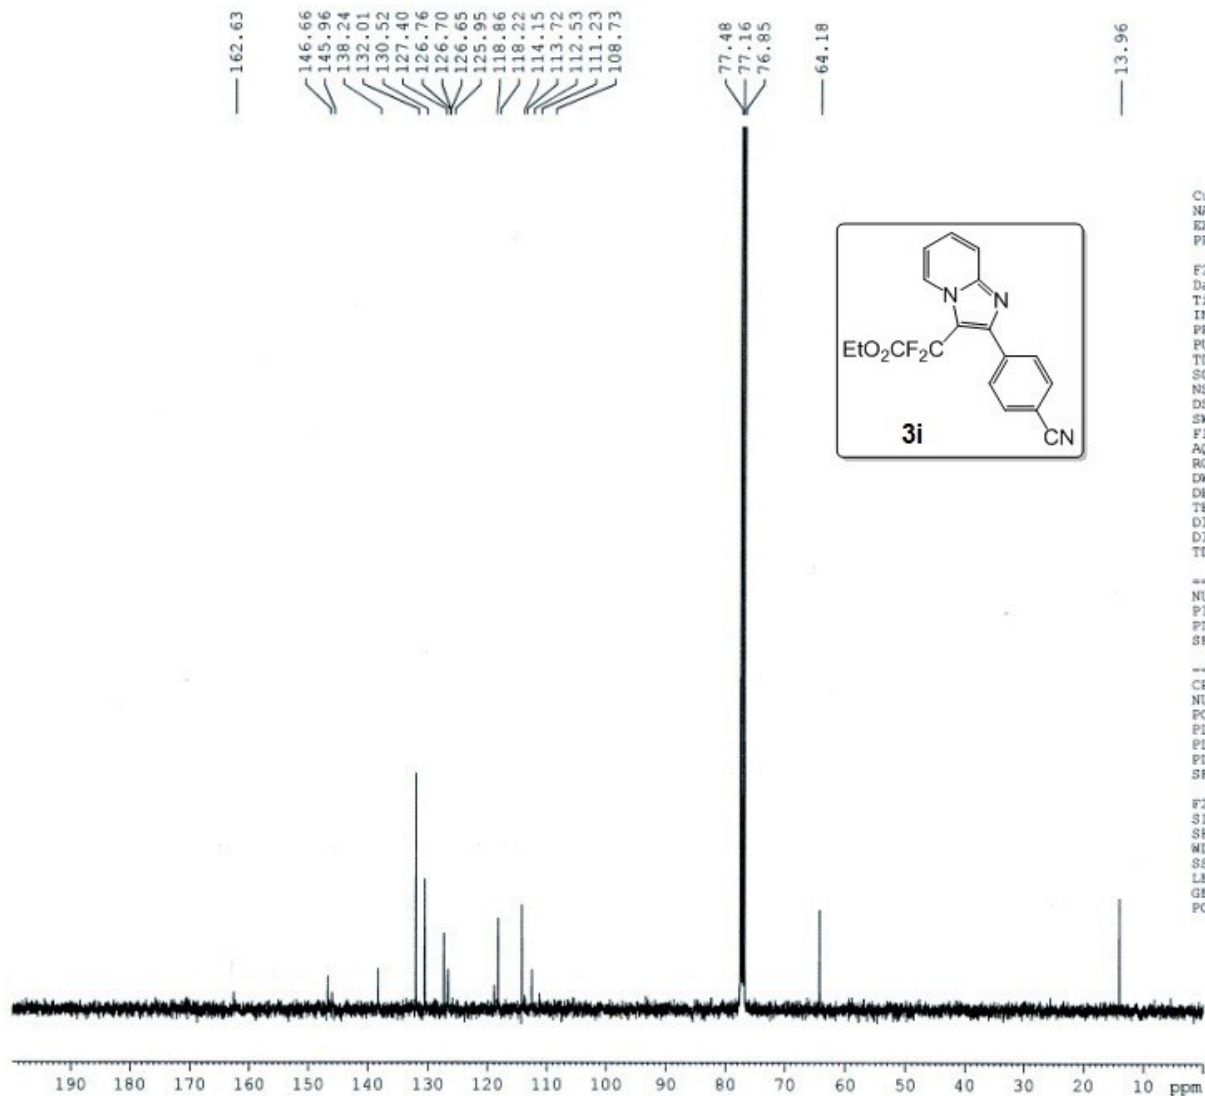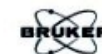

Current Data Parameters  
 NAME Dr. A HAJRA 2015  
 EXPNO 297  
 PROCNO 1

F2 - Acquisition Parameters  
 Date\_ 20150620  
 Time 14.14  
 INSTRUM spect  
 PROBHD 5 mm PABBO BB/  
 PULPROG zgpg30  
 TD 32768  
 SOLVENT CDCl3  
 NS 800  
 DS 2  
 SWH 24038.461 Hz  
 FIDRES 0.733596 Hz  
 AQ 0.6816244 sec  
 RG 87.66  
 DW 20.800 usec  
 DE 6.50 usec  
 TE 297.9 K  
 D1 2.00000000 sec  
 D11 0.03000000 sec  
 TDO 1

----- CHANNEL f1 -----  
 NUC1 13C  
 P1 8.90 usec  
 PLW1 54.00000000 W  
 SFO1 100.6278588 MHz

----- CHANNEL f2 -----  
 CPDPRG2 waltz16  
 NUC2 1H  
 PCPD2 80.00 usec  
 PLW2 12.00000000 W  
 PLW12 0.40792999 W  
 PLW13 0.26107801 W  
 SFO2 400.1516006 MHz

F2 - Processing parameters  
 SI 16384  
 SF 100.6177828 MHz  
 WDW EM  
 SSB 0  
 LB 1.00 Hz  
 GB 0  
 PC 1.40

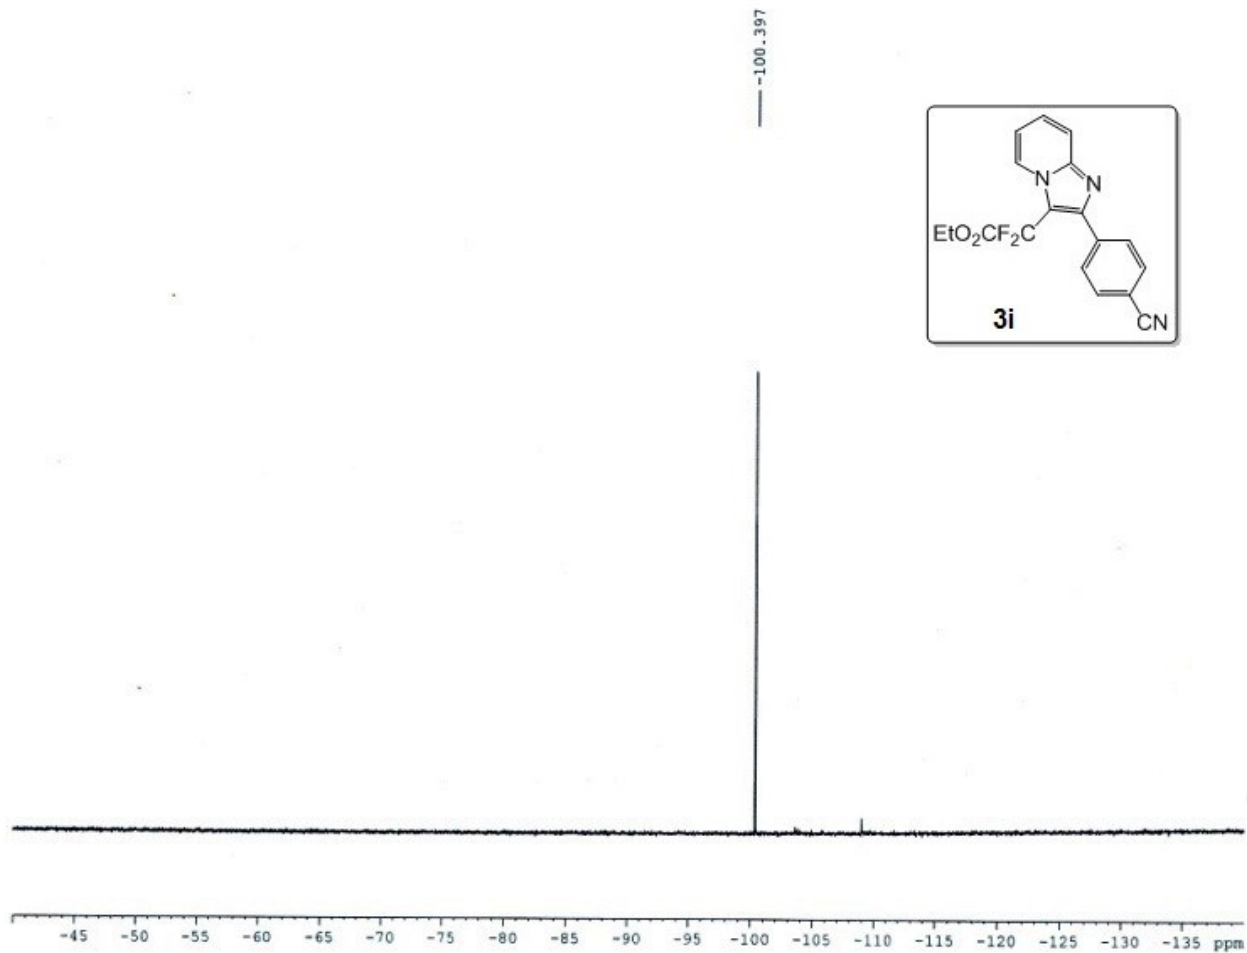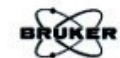

Current Data Parameters  
 NAME Dr. A HAJRA 2015  
 EXPNO 293  
 PROCNO 1

F2 - Acquisition Parameters  
 Date\_ 20150619  
 Time\_ 18.10  
 INSTRUM spect  
 PROBHD 5 mm PABBO BB/  
 PULPROG zgpg30  
 TD 32768  
 SOLVENT CDCl3  
 NS 4  
 DS 2  
 SWH 89285.711 Hz  
 FIDRES 2.724784 Hz  
 AQ 0.1835508 sec  
 RG 87.66  
 DW 5.600 usec  
 DE 6.50 usec  
 TE 297.7 K  
 D1 1.0000000 sec  
 TD0 1

===== CHANNEL f1 =====  
 NUC1 19F  
 P1 12.50 usec  
 PLW1 20.0000000 W  
 SFO1 376.4795333 MHz

F2 - Processing parameters  
 SI 16384  
 SF 376.5171850 MHz  
 WDW EM  
 SSB 0  
 LB 0.30 Hz  
 GB 0  
 PC 1.00

8.580  
8.562  
8.118  
7.932  
7.921  
7.911  
7.897  
7.890  
7.882  
7.866  
7.819  
7.798  
7.795  
7.757  
7.734  
7.533  
7.526  
7.524  
7.518  
7.516  
7.509  
7.404  
7.402  
7.384  
7.380  
7.365  
7.260  
6.994  
6.992  
6.976  
6.974  
6.959  
6.957

3.924  
3.906  
3.889  
3.871

1.106  
1.088  
1.070

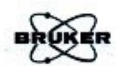

Current Data Parameters  
NAME Dr. A HAJRA 2015  
EXPNO 433  
PROCNO 1

F2 - Acquisition Parameters  
Date\_ 20150724  
Time 11.58  
INSTRUM spect  
PROBHD 5 mm PABBO BB/  
PULPROG zg30  
TD 32768  
SOLVENT CDC13  
NS 32  
DS 1  
SWH 8223.685 Hz  
FIDRES 0.250967 Hz  
AQ 1.9923444 sec  
RG 135.7  
DW 60.800 usec  
DE 6.50 usec  
TE 299.9 K  
D1 1.00000000 sec  
TDO 1

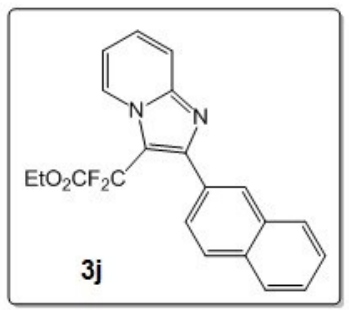

----- CHANNEL f1 -----  
NUC1 1H  
P1 14.75 usec  
PLW1 11.99499989 W  
SFO1 400.1524711 MHz

F2 - Processing parameters  
SI 16384  
SF 400.1500089 MHz  
WDW EM  
SSB 0  
LB 0.30 Hz  
GB 0  
PC 1.00

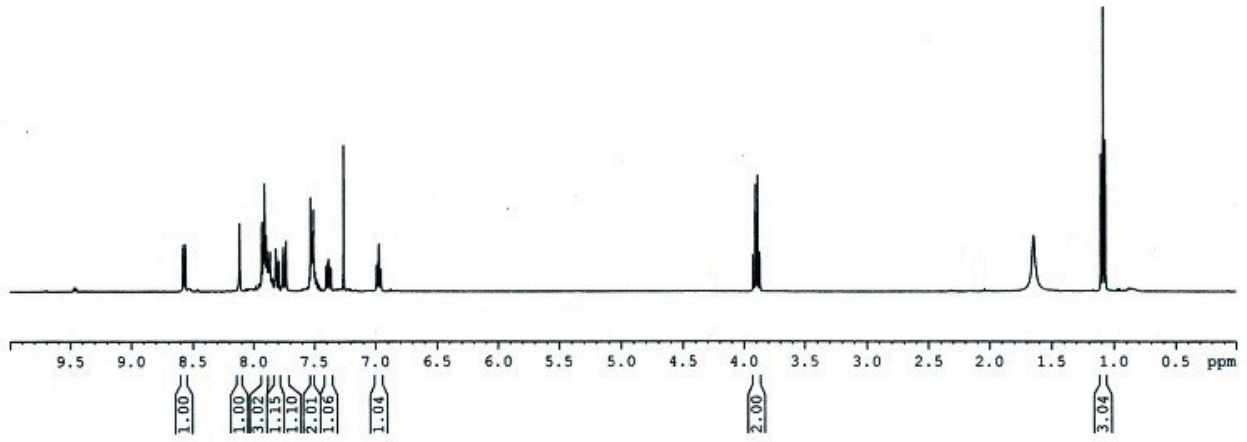

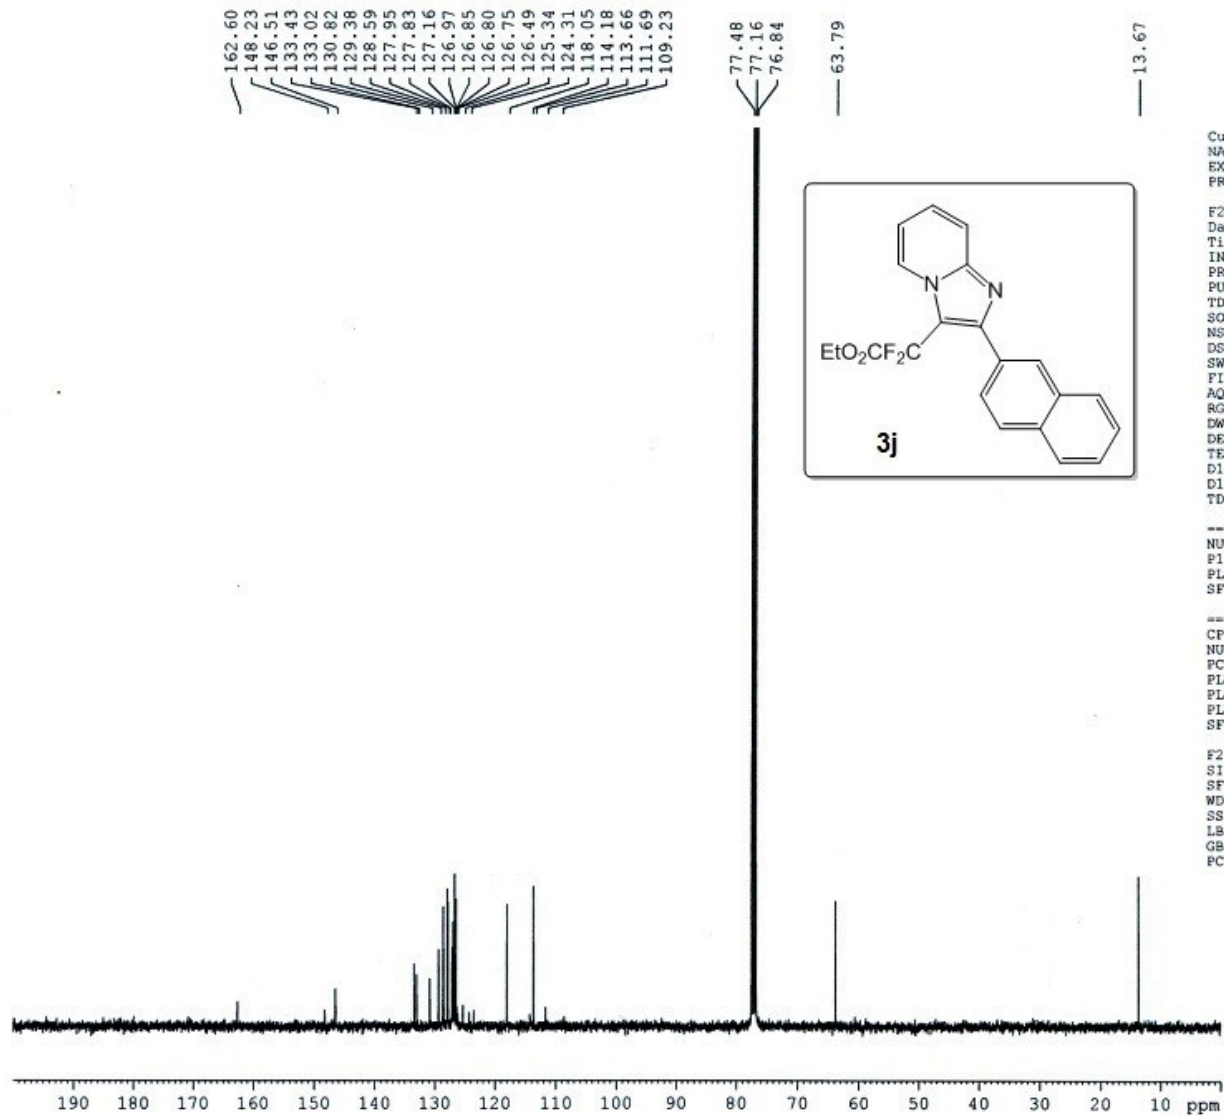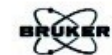

Current Data Parameters  
 NAME Dr. A HAJRA 2015  
 EXPNO 438  
 PROCNO 1

F2 - Acquisition Parameters  
 Date\_ 20150726  
 Time 18.39  
 INSTRUM spect  
 PROBHD 5 mm PABBO BB/  
 PULPROG zgpg30  
 TD 32768  
 SOLVENT CDCl3  
 NS 800  
 DS 2  
 SWH 24038.461 Hz  
 FIDRES 0.733596 Hz  
 AQ 0.6816244 sec  
 RG 87.66  
 DW 20.800 usec  
 DE 6.50 usec  
 TE 299.1 K  
 D1 2.00000000 sec  
 D11 0.03000000 sec  
 TD0 1

----- CHANNEL f1 -----  
 NUC1 13C  
 P1 8.90 usec  
 PLW1 54.00000000 W  
 SFO1 100.6278588 MHz

----- CHANNEL f2 -----  
 CFDPFG2 waltz16  
 NUC2 1H  
 FCPD2 80.00 usec  
 PLW2 12.00000000 W  
 PLW12 0.40792999 W  
 PLW13 0.26107001 W  
 SFO2 400.1516006 MHz

F2 - Processing parameters  
 S1 16384  
 SF 100.6177836 MHz  
 WDW EM  
 SSB 0  
 LB 1.00 Hz  
 GB 0  
 PC 1.40



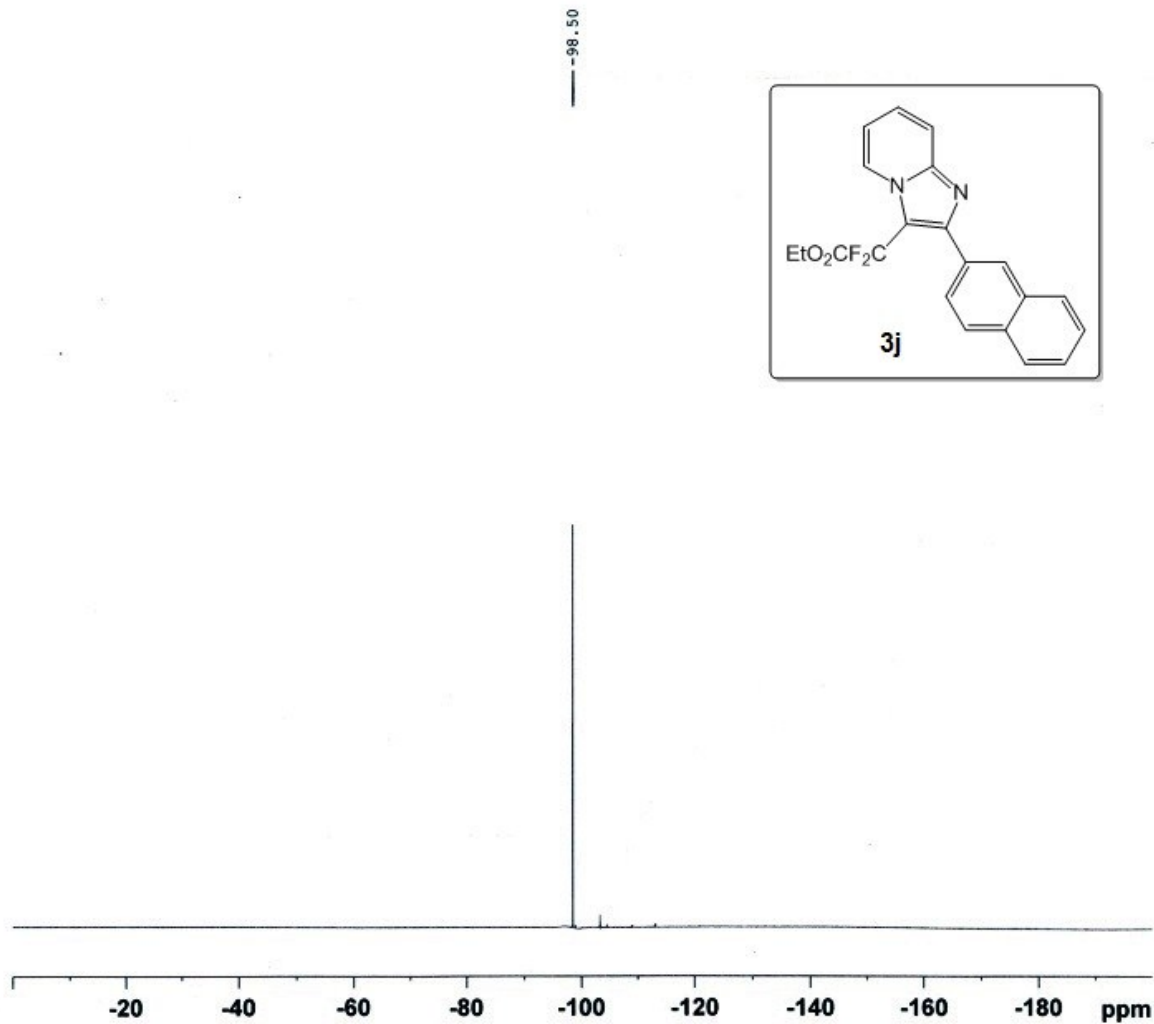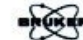

Current Data Parameters  
 NAME    Dr. A HAJRA 2015  
 EXPNO    437  
 PROCNO    1

F2 - Acquisition Parameters  
 Date\_    20150724  
 Time    19.41  
 INSTRUM    spect  
 PROBHD    5 mm PABBO BB/  
 PULPROG    zgpg30  
 TD    32768  
 SOLVENT    CDCl3  
 NS    16  
 DS    2  
 SWH    89285.711 Hz  
 FIDRES    2.724784 Hz  
 AQ    0.1835508 sec  
 RG    135.7  
 DW    5.600 usec  
 DE    6.50 usec  
 TE    297.6 K  
 D1    1.00000000 sec  
 TDO    1

----- CHANNEL f1 -----  
 NUC1    13C  
 P1    12.50 usec  
 PLW1    20.00000000 W  
 SF01    376.4795333 MHz

F2 - Processing parameters  
 SI    16384  
 SF    376.5171850 MHz  
 WDW    EM  
 SSB    0  
 LB    0.30 Hz  
 GB    0  
 PC    1.00

8.644  
8.626  
8.534  
8.523  
8.217  
8.198  
7.831  
7.827  
7.812  
7.807  
7.792  
7.788  
7.771  
7.749  
7.384  
7.369  
7.366  
7.361  
7.346  
7.344  
7.276  
7.274  
7.260  
7.245  
7.243  
6.980  
6.978  
6.962  
6.961  
6.945  
6.943

4.115  
4.097  
4.079  
4.061

1.067  
1.049  
1.031

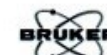

Current Data Parameters  
NAME Dr. A HAJRA 2015  
EXPNO 567  
PROCNO 1

F2 - Acquisition Parameters  
Date\_ 20150831  
Time 11.27  
INSTRUM spect  
PROBHD 5 mm PABBO BB/  
PULPROG zg30  
TD 32768  
SOLVENT CDCl3  
NS 32  
DS 1  
SWH 8223.685 Hz  
FIDRES 0.250967 Hz  
AQ 1.9923444 sec  
RG 93.46  
DW 60.800 usec  
DE 6.50 usec  
TE 296.8 K  
D1 1.00000000 sec  
TDO 1

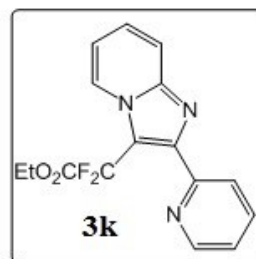

----- CHANNEL f1 -----  
NUC1 1H  
P1 14.75 usec  
PLW1 11.99499989 W  
SFO1 400.1524711 MHz

F2 - Processing parameters  
SI 16384  
SF 400.1500090 MHz  
WDW EM  
SSB 0  
LB 0.30 Hz  
GB 0  
PC 1.00

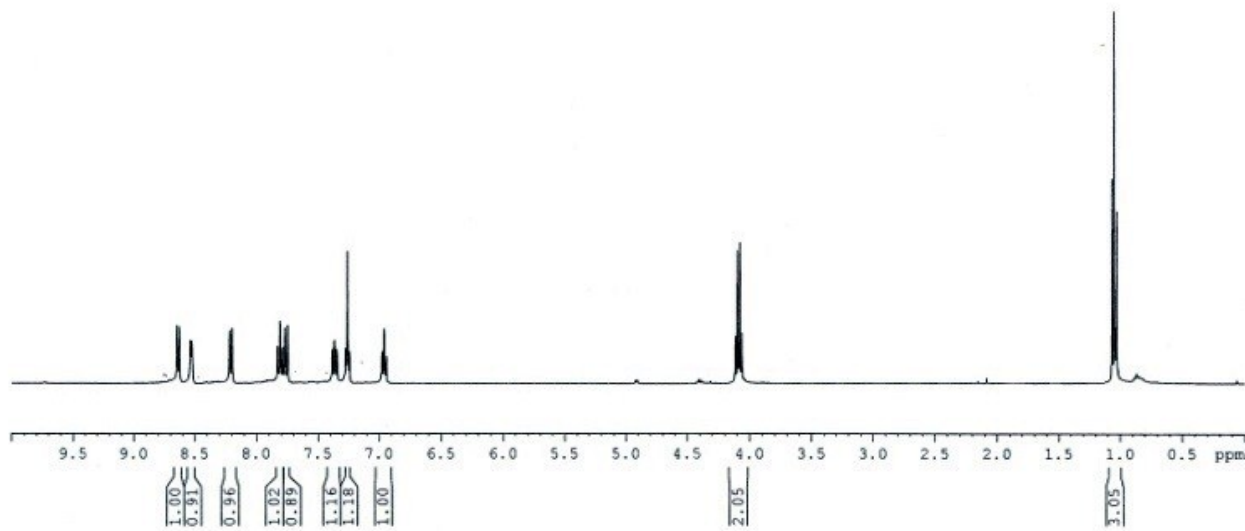

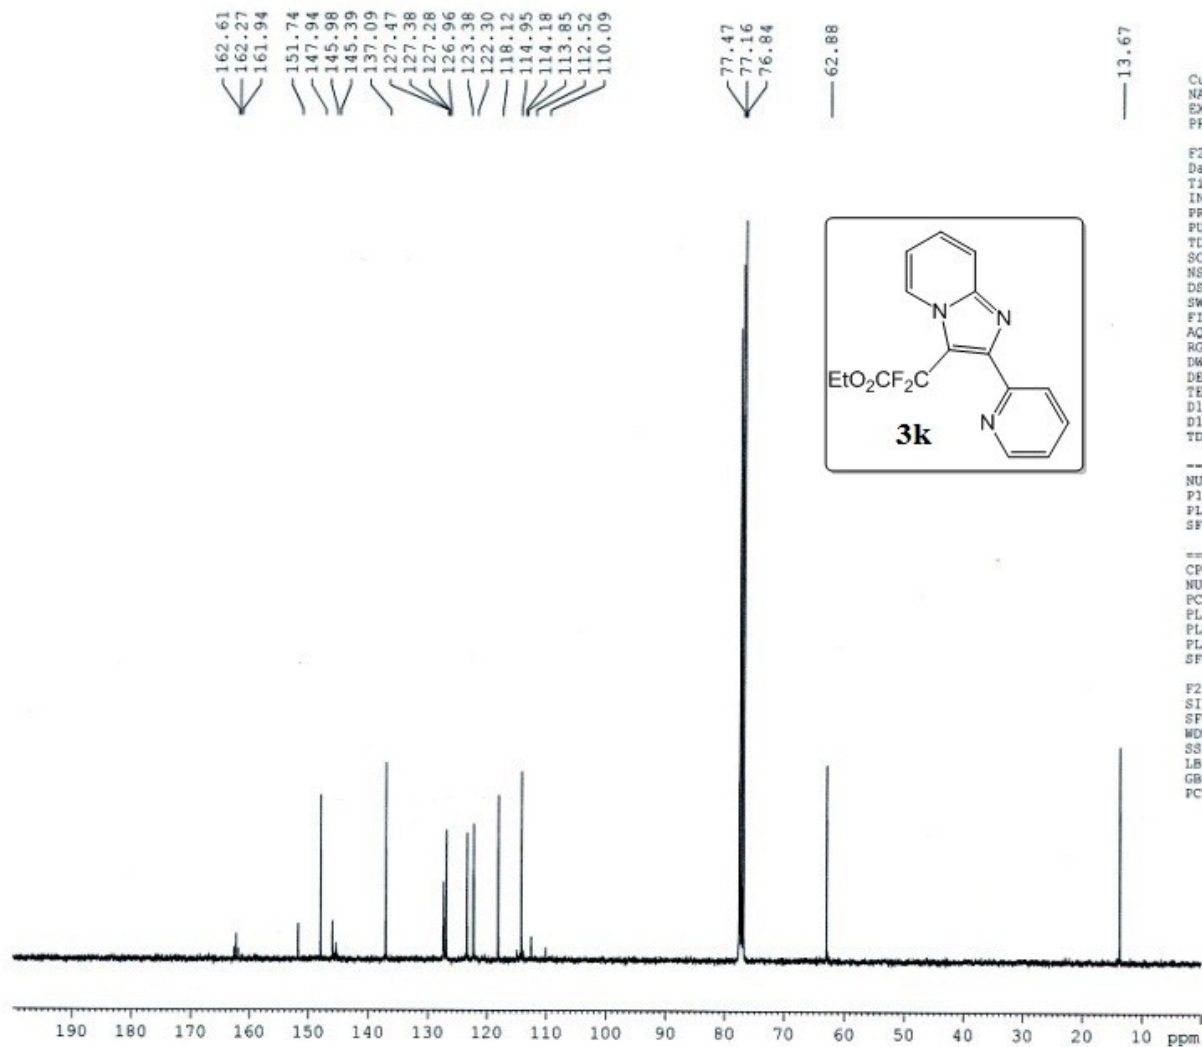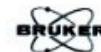

Current Data Parameters  
 NAME Dr. A HAJRA 2015  
 EXPNO 569  
 PROCNO 1

F2 - Acquisition Parameters  
 Date\_ 20150831  
 Time 13.05  
 INSTRUM spect  
 PROBHD 5 mm PABBO BB/  
 PULPROG zgpg30  
 TD 32768  
 SOLVENT CDC13  
 NS 800  
 DS 2  
 SWH 24038.461 Hz  
 FIDRES 0.733596 Hz  
 AQ 0.6816244 sec  
 RG 93.46  
 DW 20.800 usec  
 DE 6.50 usec  
 TE 298.8 K  
 D1 2.0000000 sec  
 D11 0.0300000 sec  
 TD0 1

----- CHANNEL f1 -----  
 NUC1 13C  
 P1 8.90 usec  
 PLW1 54.0000000 W  
 SFO1 100.6278588 MHz

----- CHANNEL f2 -----  
 CPDPRG2 waltz16  
 NUC2 1H  
 PCPD2 80.00 usec  
 PLW2 12.0000000 W  
 PLW12 0.40792999 W  
 PLW13 0.26107001 W  
 SFO2 400.1516006 MHz

F2 - Processing parameters  
 SI 16384  
 SF 100.6177850 MHz  
 WDW EM  
 SSB 0  
 LB 1.00 Hz  
 GB 0  
 PC 1.40

-96.43

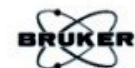

Current Data Parameters  
NAME Dr. A HAJRA 2015  
EXPNO 565  
PROCNO 1

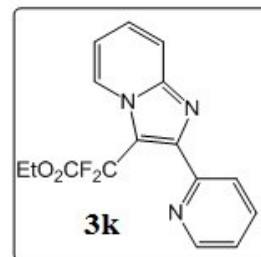

F2 - Acquisition Parameters  
Date\_ 20150829  
Time 12.33  
INSTRUM spect  
PROBHD 5 mm PABBO BB/  
PULPROG zgfglqn  
TD 32768  
SOLVENT CDCl3  
NS 4  
DS 2  
SWH 89285.711 Hz  
FIDRES 2.724784 Hz  
AQ 0.1835508 sec  
RG 135.7  
DW 5.600 usec  
DE 6.50 usec  
TE 296.8 K  
D1 1.00000000 sec  
TDO 1

===== CHANNEL f1 =====  
NUC1 19F  
P1 12.75 usec  
PLW1 20.00000000 W  
SFO1 376.4795333 MHz

F2 - Processing parameters  
SI 16384  
SF 376.5171850 MHz  
WDW EM  
SSB 0  
LB 0.30 Hz  
GB 0  
PC 1.00

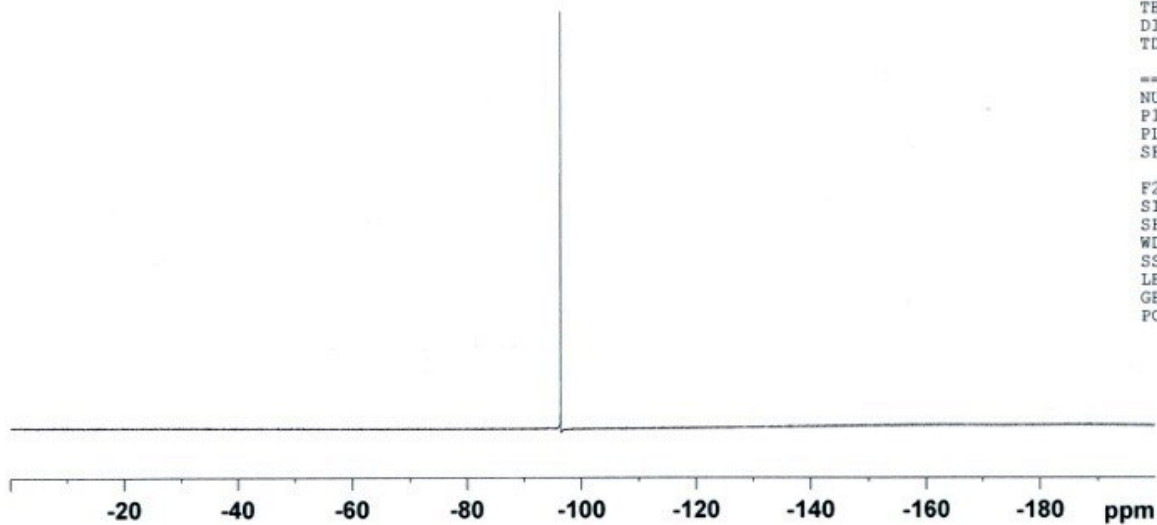

8.584  
8.580  
7.662  
7.638  
7.630  
7.624  
7.610  
7.607  
7.460  
7.456  
7.447  
7.444  
7.439  
7.433  
7.429  
7.422  
7.351  
7.346  
7.327  
7.322  
7.260

4.035  
4.017  
3.999  
3.981

1.183  
1.165  
1.147

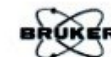

Current Data Parameters  
NAME Dr. A HAJRA 2015  
EXPNO 514  
PROCNO 1

F2 - Acquisition Parameters  
Date\_ 20150809  
Time 10.10  
INSTRUM spect  
PROBHD 5 mm PABBO BB/  
PULPROG zg30  
TD 32768  
SOLVENT CDCl3  
NS 32  
DS 1  
SWH 8223.685 Hz  
FIDRES 0.250967 Hz  
AQ 1.992344 sec  
RG 120.16  
DW 60.800 usec  
DE 6.50 usec  
TE 296.1 K  
D1 1.00000000 sec  
TDO 1

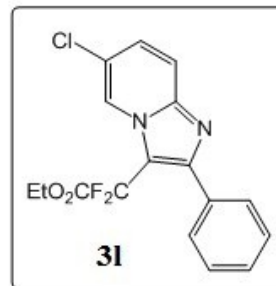

===== CHANNEL f1 =====  
NUC1 1H  
P1 14.75 usec  
PLW1 11.99499989 W  
SF01 400.1524711 MHz

F2 - Processing parameters  
SI 16384  
SF 400.1500090 MHz  
WDW EM  
SSB 0  
LB 0.30 Hz  
GB 0  
PC 1.00

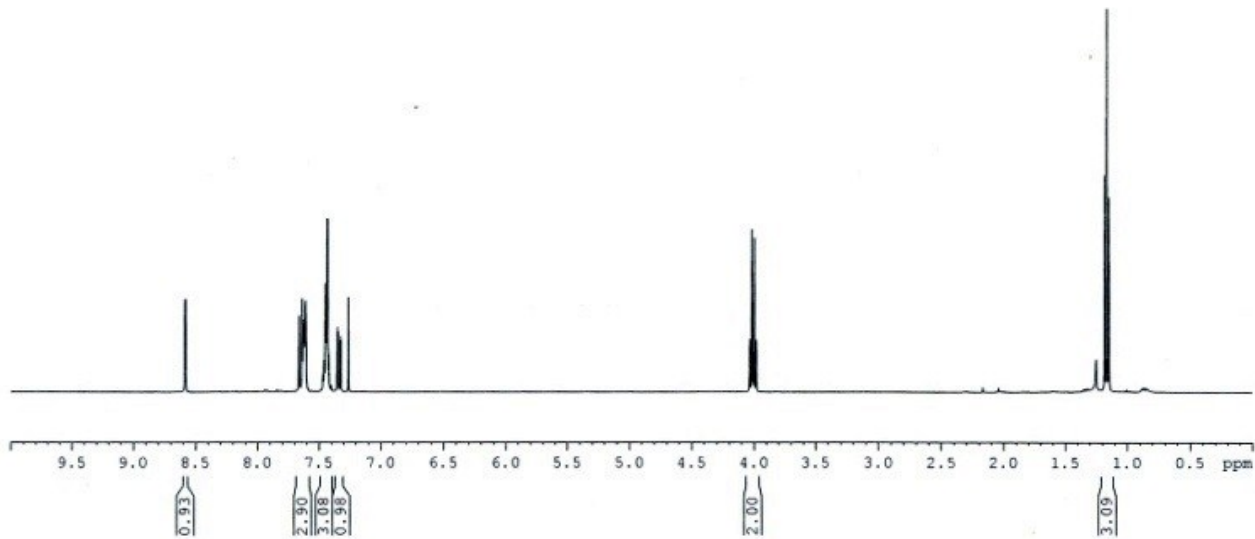

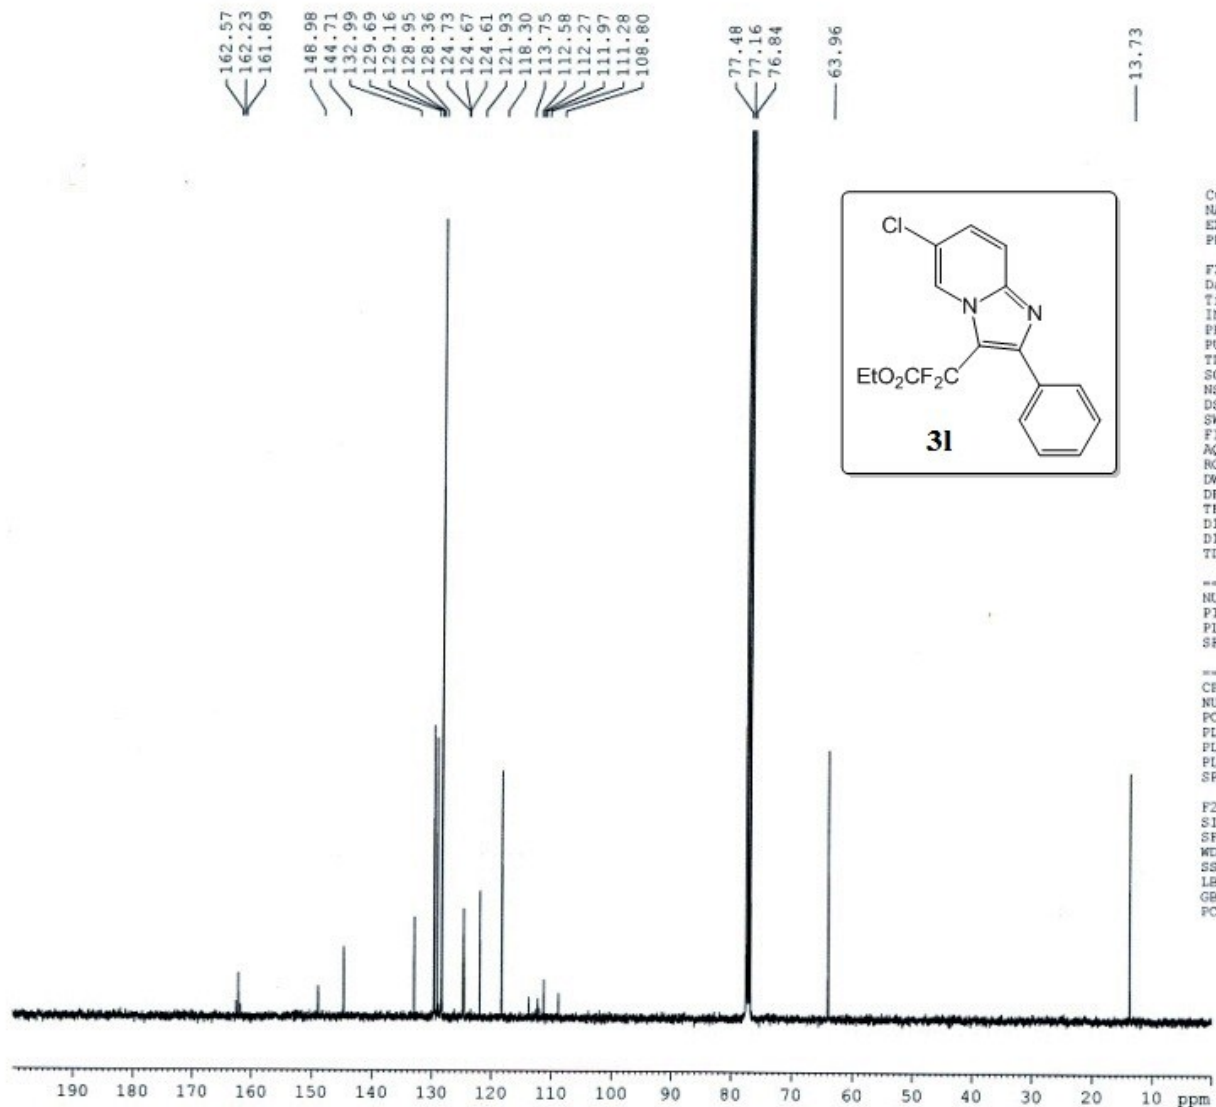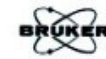

Current Data Parameters  
 NAME Dr. A HAJRA 2015  
 EXPNO 516  
 PROCNO 1

F2 - Acquisition Parameters  
 Date\_ 20150809  
 Time 12.42  
 INSTRUM spect  
 PROBHD 5 mm PABBO BB/  
 PULPROG zgpg30  
 TD 32768  
 SOLVENT CDCl3  
 NS 800  
 DS 2  
 SWH 24038.461 Hz  
 FIDRES 0.733596 Hz  
 AQ 0.6816244 sec  
 RG 120.16  
 DW 20.800 usec  
 DE 6.50 usec  
 TE 298.7 K  
 D1 2.00000000 sec  
 D11 0.03000000 sec  
 TDO 1

----- CHANNEL f1 -----  
 NUC1 13C  
 P1 8.90 usec  
 PLW1 54.00000000 W  
 SFO1 100.6278588 MHz

----- CHANNEL f2 -----  
 CPDPRG2 waltz16  
 NUC2 1H  
 PCPD2 80.00 usec  
 PLW2 12.00000000 W  
 PLW12 0.40792999 W  
 PLW13 0.26107001 W  
 SFO2 400.1516006 MHz

F2 - Processing parameters  
 SI 16384  
 SF 100.6177836 MHz  
 MW EM  
 SSB 0  
 LB 1.00 Hz  
 GB 0  
 PC 1.40

---99.86---

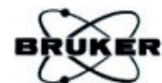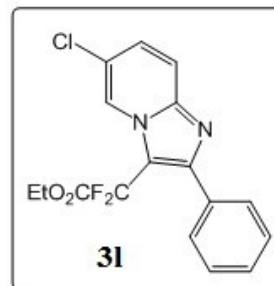

Current Data Parameters  
NAME Dr. A HAJRA 2015  
EXPNO 515  
PROCNO 1

F2 - Acquisition Parameters  
Date\_ 20150809  
Time 10.12  
INSTRUM spect  
PROBHD 5 mm PABBO BB/  
PULPROG zgpg30  
TD 32768  
SOLVENT CDCl3  
NS 4  
DS 2  
SWH 89285.711 Hz  
FIDRES 2.724784 Hz  
AQ 0.1835508 sec  
RG 120.16  
DW 5.600 usec  
DE 6.50 usec  
TE 296.1 K  
D1 1.00000000 sec  
TDO 1

----- CHANNEL f1 -----  
NUC1 19F  
P1 12.75 usec  
PL1 20.0000000 W  
SFO1 376.4793333 MHz

F2 - Processing parameters  
SI 16384  
SF 376.5171850 MHz  
WDW EM  
SSB 0  
LB 0.30 Hz  
GB 0  
PC 1.00

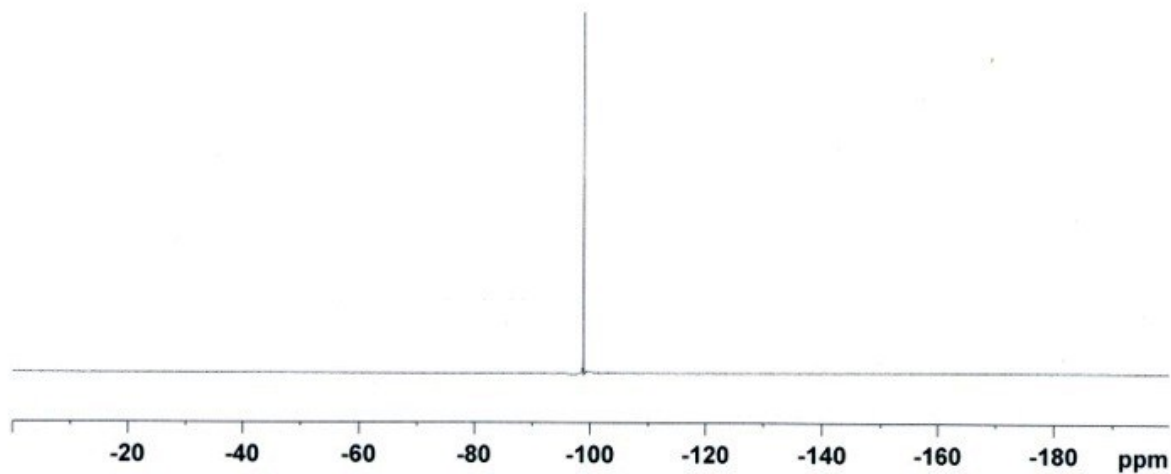

7.712  
7.701  
7.519  
7.498  
7.260  
7.231  
7.211  
6.952  
6.940

4.082  
4.064  
4.046  
4.028

2.376

1.137  
1.120  
1.101

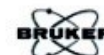

Current Data Parameters  
NAME Dr. A HAJRA 2015  
EXPNO 519  
PROCNO 1

F2 - Acquisition Parameters  
Date\_ 20150811  
Time 9.33  
INSTRUM spect  
PROBHD 5 mm PABBO BB/  
PULPROG zg30  
TD 32768  
SOLVENT CDCl3  
NS 24  
DS 1  
SWH 8223.685 Hz  
FIDRES 0.250967 Hz  
AQ 1.9923444 sec  
RG 40.87  
DW 60.800 usec  
DE 6.50 usec  
TE 296.3 K  
D1 1.00000000 sec  
TDO 1

----- CHANNEL f1 -----  
NUC1 1H  
P1 14.75 usec  
PLW1 11.99499989 W  
SFO1 400.1524711 MHz

F2 - Processing parameters  
S1 16384  
SF 400.1500090 MHz  
WDW EM  
SSB 0  
LB 0.30 Hz  
GB 0  
PC 1.00

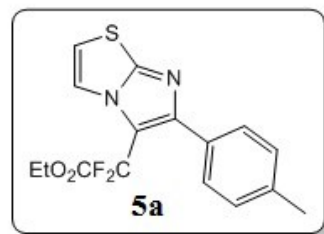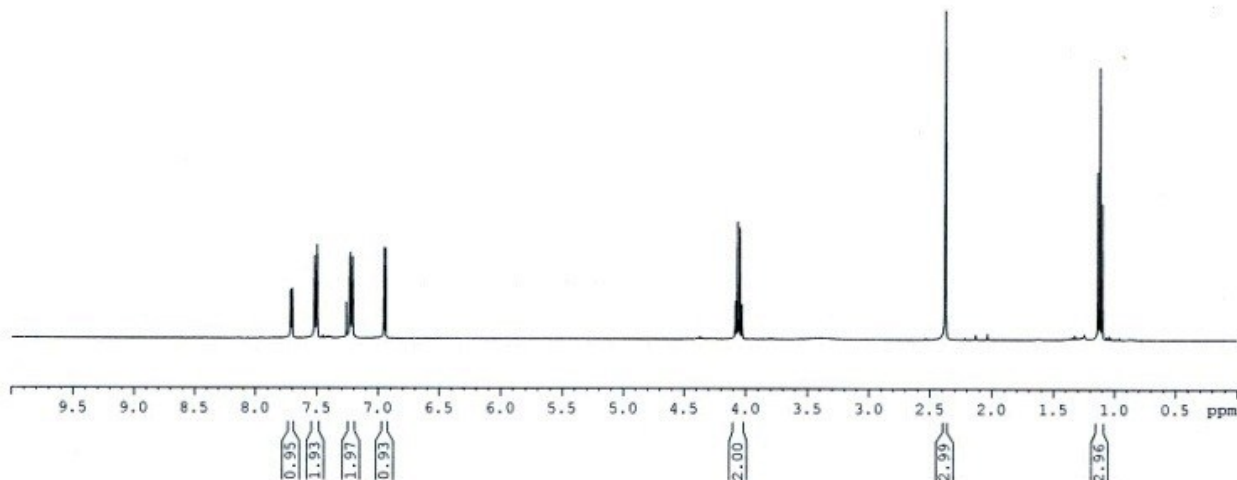



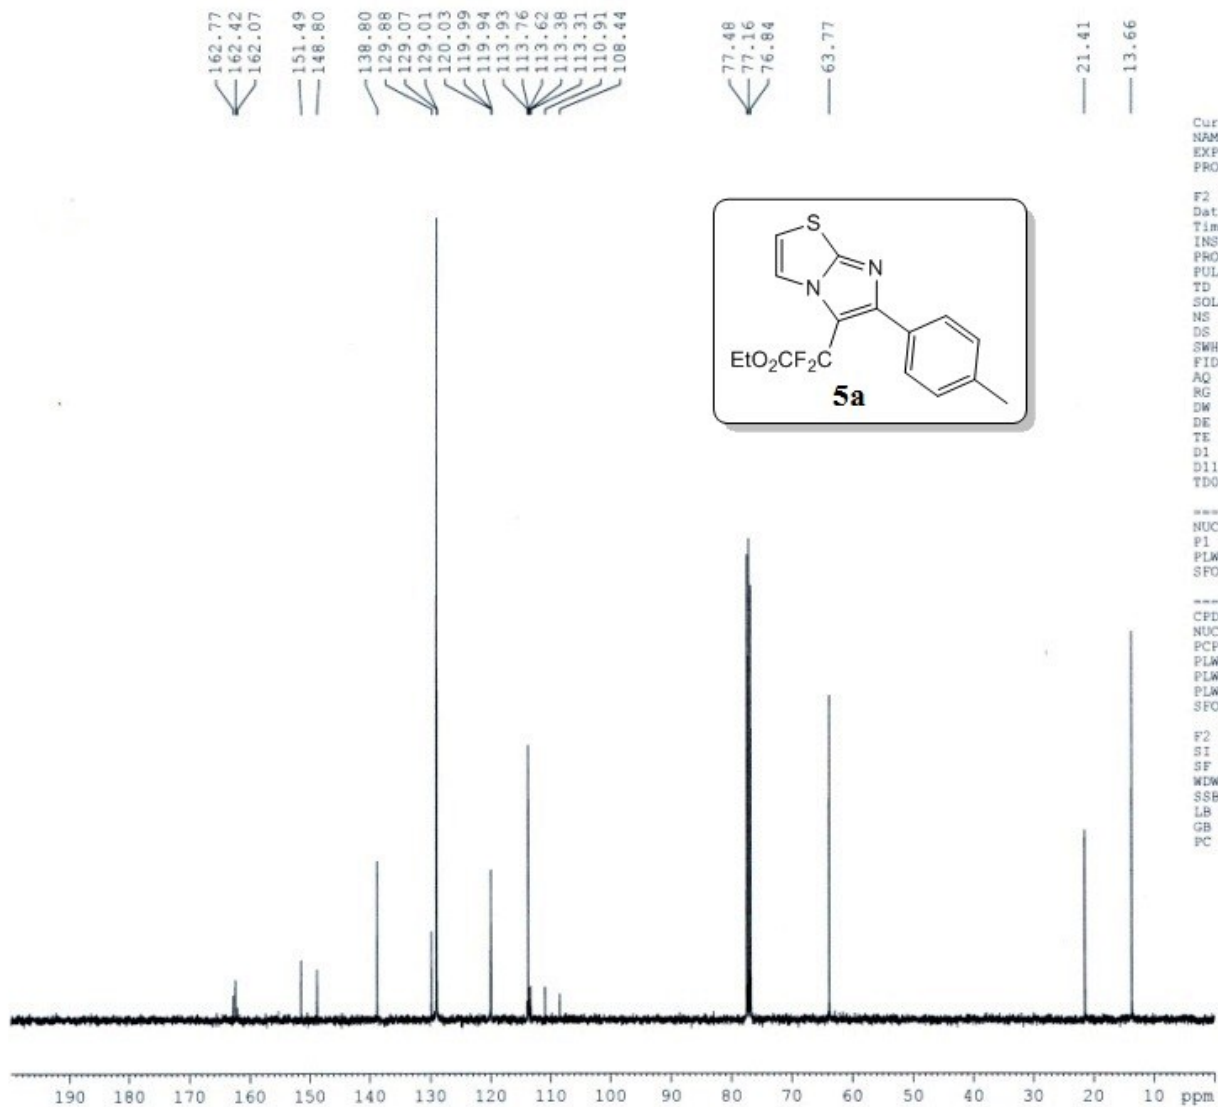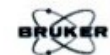

Current Data Parameters  
 NAME Dr. A HAJRA 2015  
 EXPNO 521  
 PROCNO 1

F2 - Acquisition Parameters  
 Date\_ 20150811  
 Time\_ 9.52  
 INSTRUM spect  
 PROBHD 5 mm PABBO BB/  
 PULPROG zgpg30  
 TD 32768  
 SOLVENT CDCl3  
 NS 320  
 DS 2  
 SWH 24038.461 Hz  
 FIDRES 0.733596 Hz  
 AQ 0.6816244 sec  
 RG 40.87  
 DW 20.800 usec  
 DE 6.50 usec  
 TE 297.4 K  
 D1 2.00000000 sec  
 D11 0.03000000 sec  
 TDO 1

----- CHANNEL f1 -----  
 NUC1 13C  
 P1 8.90 usec  
 PLW1 54.00000000 W  
 SFO1 100.6278588 MHz

----- CHANNEL f2 -----  
 CFDPGR2 waltz16  
 NUC2 1H  
 PCPD2 80.00 usec  
 PLW2 12.00000000 W  
 PLW12 0.40792999 W  
 PLW13 0.24107001 W  
 SFO2 400.1516006 MHz

F2 - Processing parameters  
 SI 16384  
 SF 100.6177880 MHz  
 WDW EM  
 SSB 0  
 LB 1.00 Hz  
 GB 0  
 PC 1.40

— -97.26

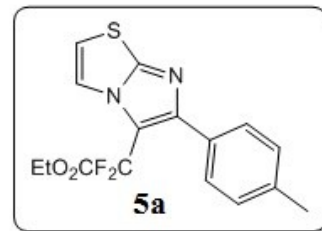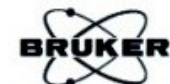

Current Data Parameters  
NAME Dr. A HAJRA 2015  
EXPNO 520  
PROCNO 1

F2 - Acquisition Parameters  
Date\_ 20150811  
Time 9.35  
INSTRUM spect  
PROBHD 5 mm PABBO BB/  
PULPROG zgpg30  
TD 32768  
SOLVENT CDCl3  
NS 4  
DS 2  
SWH 89285.711 Hz  
FIDRES 2.724784 Hz  
AQ 0.1835508 sec  
RG 40.87  
DW 5.600 usec  
DE 6.50 usec  
TE 296.3 K  
D1 1.00000000 sec  
TDO 1

\*\*\*\*\* CHANNEL f1 \*\*\*\*\*  
NUC1 19F  
P1 12.75 usec  
PLW1 20.00000000 W  
SFO1 376.4795333 MHz

F2 - Processing parameters  
SI 16384  
SF 376.5171850 MHz  
WDW EM  
SSB 0  
LB 0.30 Hz  
GB 0  
PC 1.00

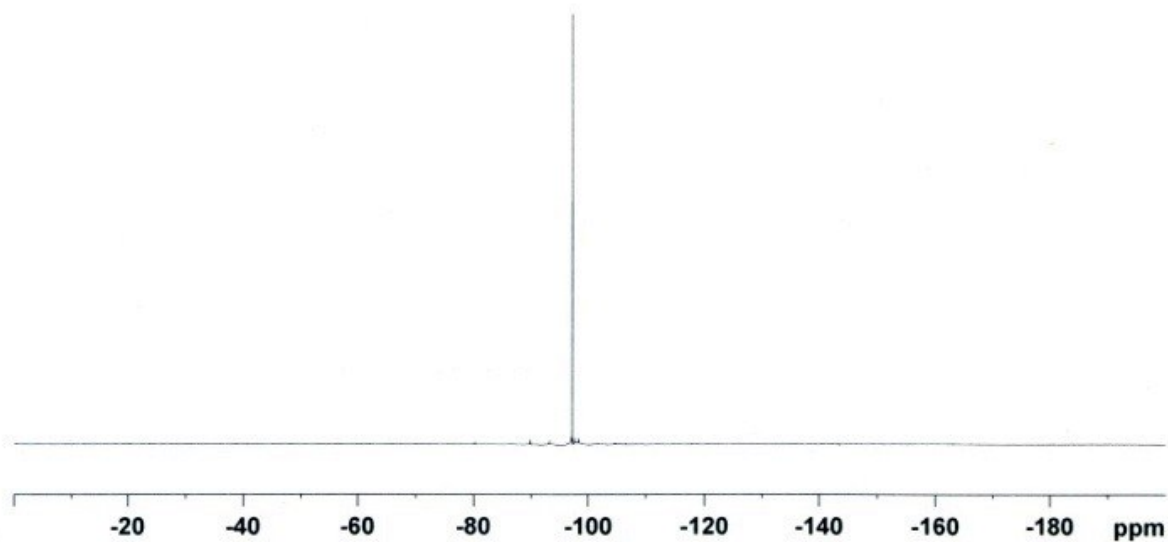

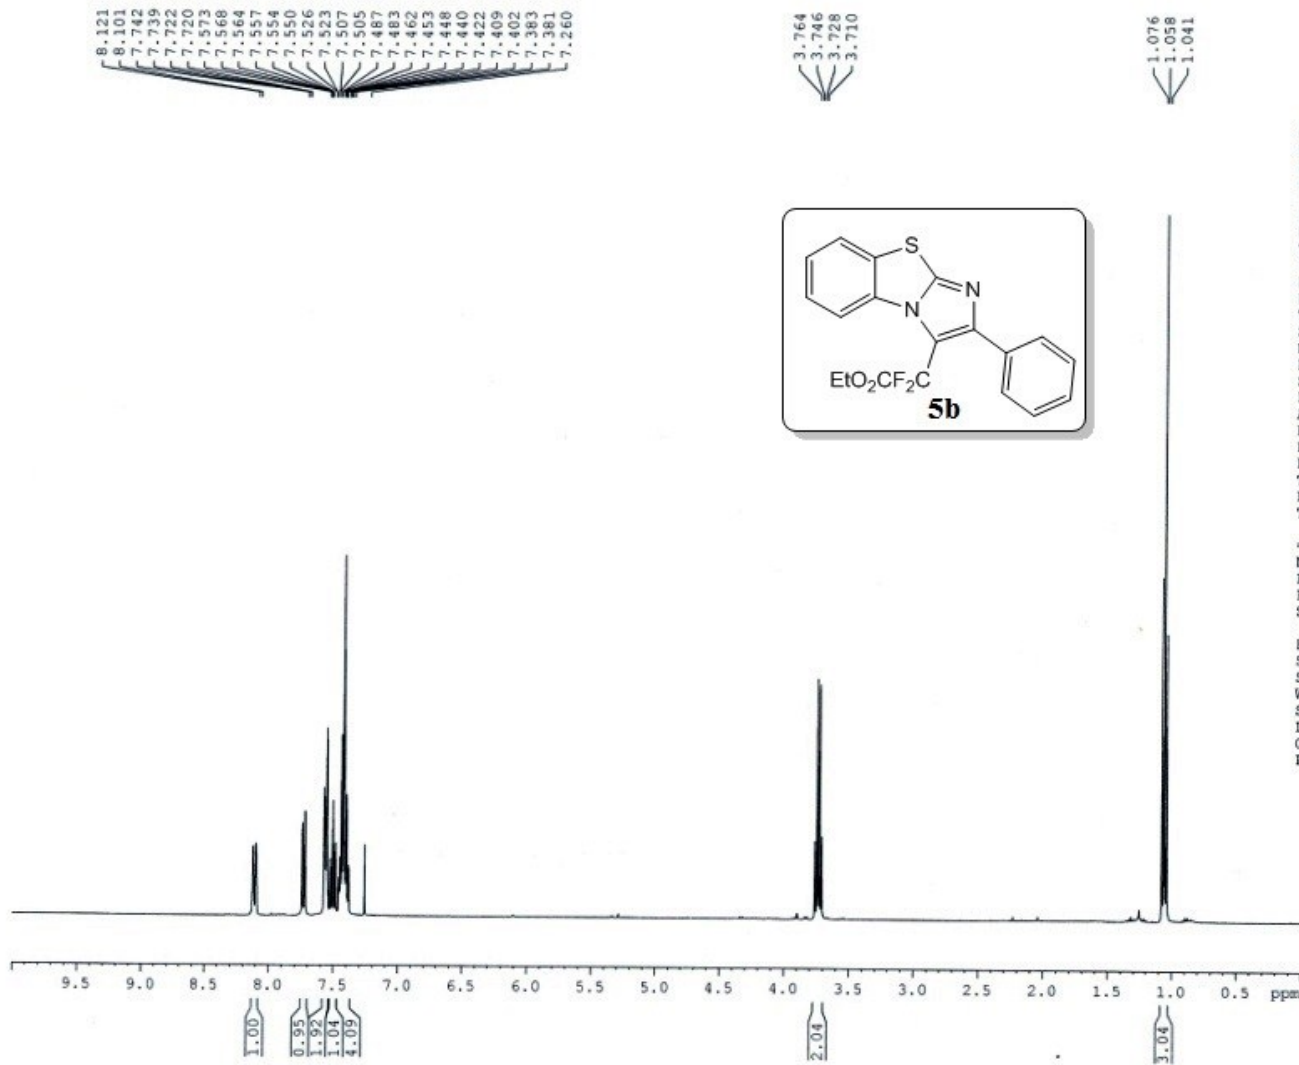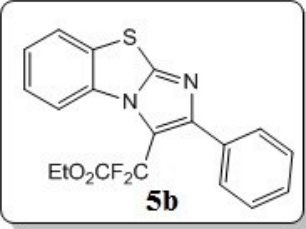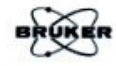

Current Data Parameters  
 NAME Dr. A HAJRA 2015  
 EXPNO 495  
 PROCNO 1

F2 - Acquisition Parameters  
 Date\_ 20150804  
 Time 17.29  
 INSTRUM spect  
 PROBHD 5 mm PABBO BB/  
 PULPROG zg30  
 TD 32768  
 SOLVENT CDCl3  
 NS 32  
 DS 1  
 SWH 8223.685 Hz  
 FIDRES 0.250967 Hz  
 AQ 1.9923444 sec  
 RG 87.66  
 DW 60.800 usec  
 DE 6.50 usec  
 TE 297.0 K  
 D1 1.00000000 sec  
 TDO 1

----- CHANNEL f1 -----  
 NUC1 1H  
 P1 14.75 usec  
 PLW1 11.99499989 W  
 SFO1 400.1524711 MHz

F2 - Processing parameters  
 SI 16384  
 SF 400.1500089 MHz  
 WDW EM  
 SSB 0  
 LB 0.30 Hz  
 GB 0  
 PC 1.00

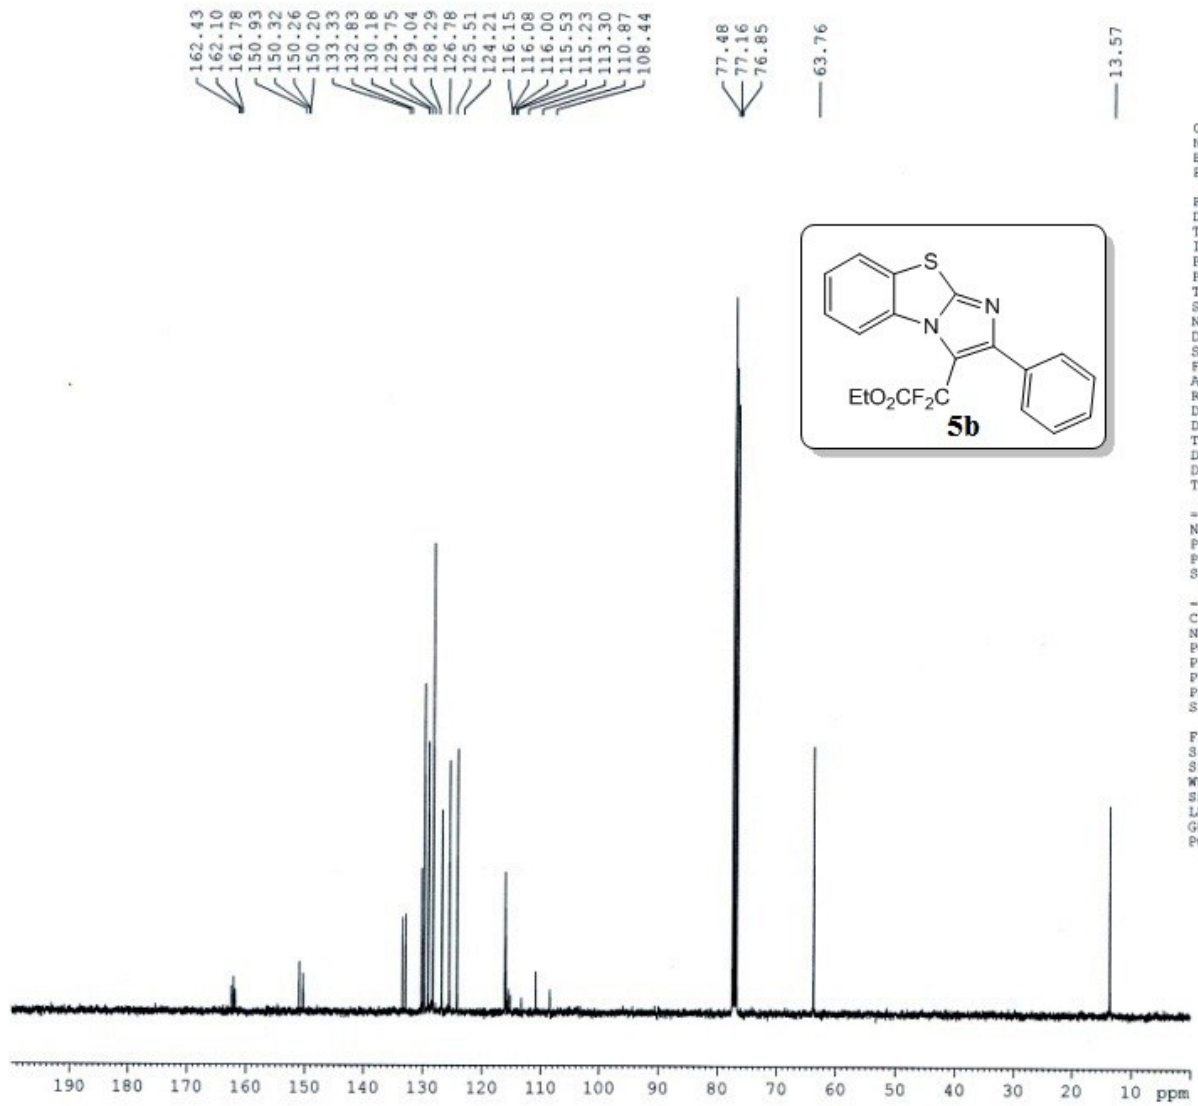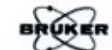

Current Data Parameters  
 NAME Dr. A HAJRA 2015  
 EXPNO 497  
 PROCNO 1

F2 - Acquisition Parameters  
 Date\_ 20150804  
 Time 19.36  
 INSTRUM spect  
 PROBHD 5 mm PABBO BB/  
 PULPROG zgpg30  
 TD 32768  
 SOLVENT CDCl3  
 NS 912  
 DS 2  
 SWH 24038.461 Hz  
 FIDRES 0.733596 Hz  
 AQ 0.6816244 sec  
 RG 87.66  
 DW 20.800 usec  
 DE 6.50 usec  
 TE 298.7 K  
 D1 2.00000000 sec  
 D11 0.03000000 sec  
 TDO 1

----- CHANNEL f1 -----  
 NUC1 13C  
 P1 8.90 usec  
 PLW1 54.00000000 W  
 SFO1 100.6278588 MHz

----- CHANNEL f2 -----  
 CPDPRG2 waltz16  
 NUC2 1H  
 PCPD2 80.00 usec  
 PLW2 12.00000000 W  
 PLW12 0.40792999 W  
 PLW13 0.26107001 W  
 SFO2 400.1516006 MHz

F2 - Processing parameters  
 SI 16384  
 SF 100.6177851 MHz  
 WDW EM  
 SSB 0  
 LB 1.00 Hz  
 GB 0  
 PC 1.40

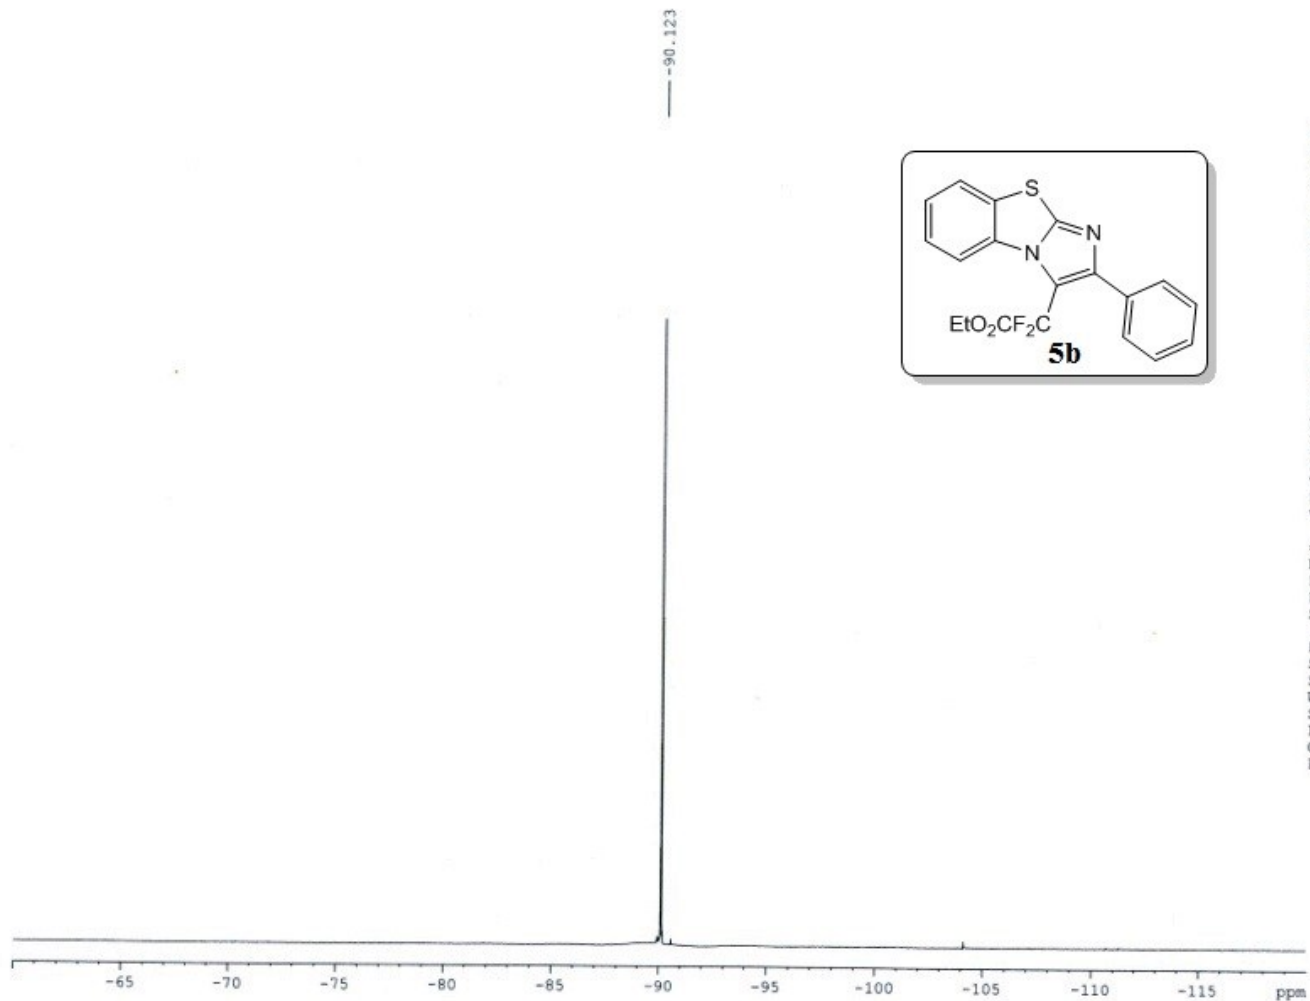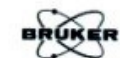

Current Data Parameters  
 NAME Dr. A HAJRA 2015  
 EXPNO 496  
 PROCNO 1

F2 - Acquisition Parameters  
 Date\_ 20150804  
 Time\_ 17.31  
 INSTRUM spect  
 PROBHD 5 mm PABBO BB/  
 PULPROG zgflgn  
 TD 32768  
 SOLVENT CDC13  
 NS 4  
 DS 2  
 SWH 89285.711 Hz  
 FIDRES 2.724784 Hz  
 AQ 0.1835508 sec  
 RG 87.66  
 DW 5.600 usec  
 DE 6.50 usec  
 TE 297.0 K  
 D1 1.00000000 sec  
 TDO 1

===== CHANNEL f1 =====  
 NUC1 19F  
 P1 12.50 usec  
 PLW1 20.00000000 W  
 SFO1 376.4795333 MHz

F2 - Processing parameters  
 SI 16384  
 SF 376.5171850 MHz  
 WDW EM  
 SSB 0  
 LB 0.30 Hz  
 GB 0  
 PC 1.00

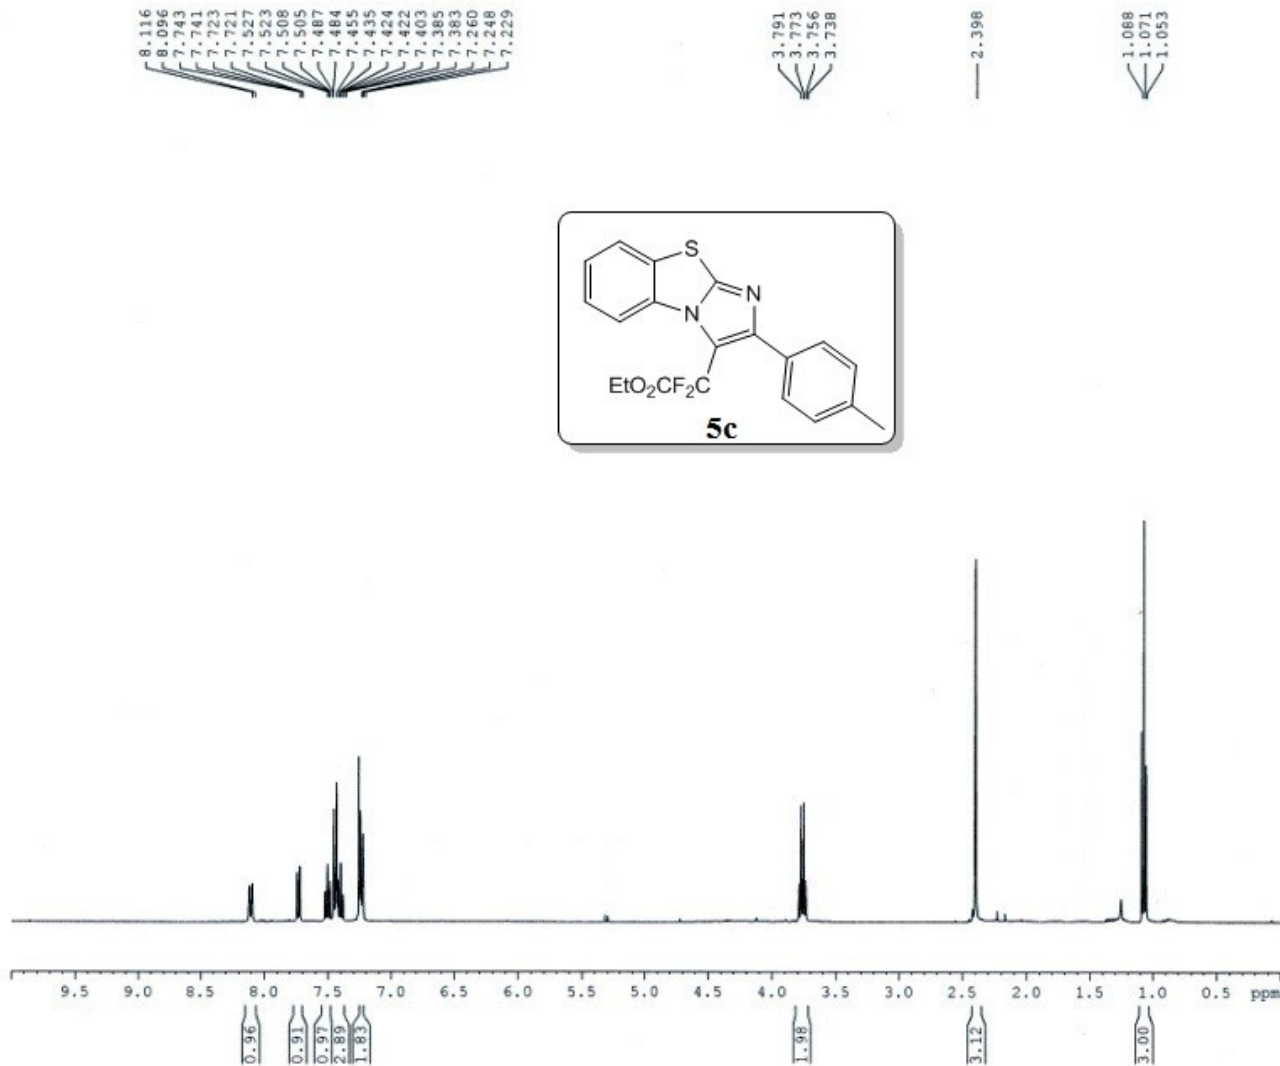

3.791  
3.773  
3.756  
3.738

2.398

1.068  
1.071  
1.053

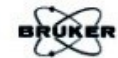

Current Data Parameters  
NAME Dr. A HAJRA 2015  
EXPNO 481  
PROCNO 1

F2 - Acquisition Parameters  
Date\_ 20150803  
Time 13.06  
INSTRUM spect  
PROBHD 5 mm PABBO BB/  
PULPROG zg30  
TD 32768  
SOLVENT CDCl3  
NS 24  
DS 1  
SWH 8223.685 Hz  
FIDRES 0.250967 Hz  
AQ 1.9923444 sec  
RG 120.16  
DW 60.800 usec  
DE 6.50 usec  
TE 296.9 K  
D1 1.00000000 sec  
TD0 1

===== CHANNEL f1 =====  
NUC1 1H  
P1 14.75 usec  
PLN1 11.99499989 W  
SFO1 400.1524711 MHz

F2 - Processing parameters  
SI 16384  
SF 400.1500090 MHz  
WDW EM  
SSB 0  
LB 0.30 Hz  
GB 0  
PC 1.00

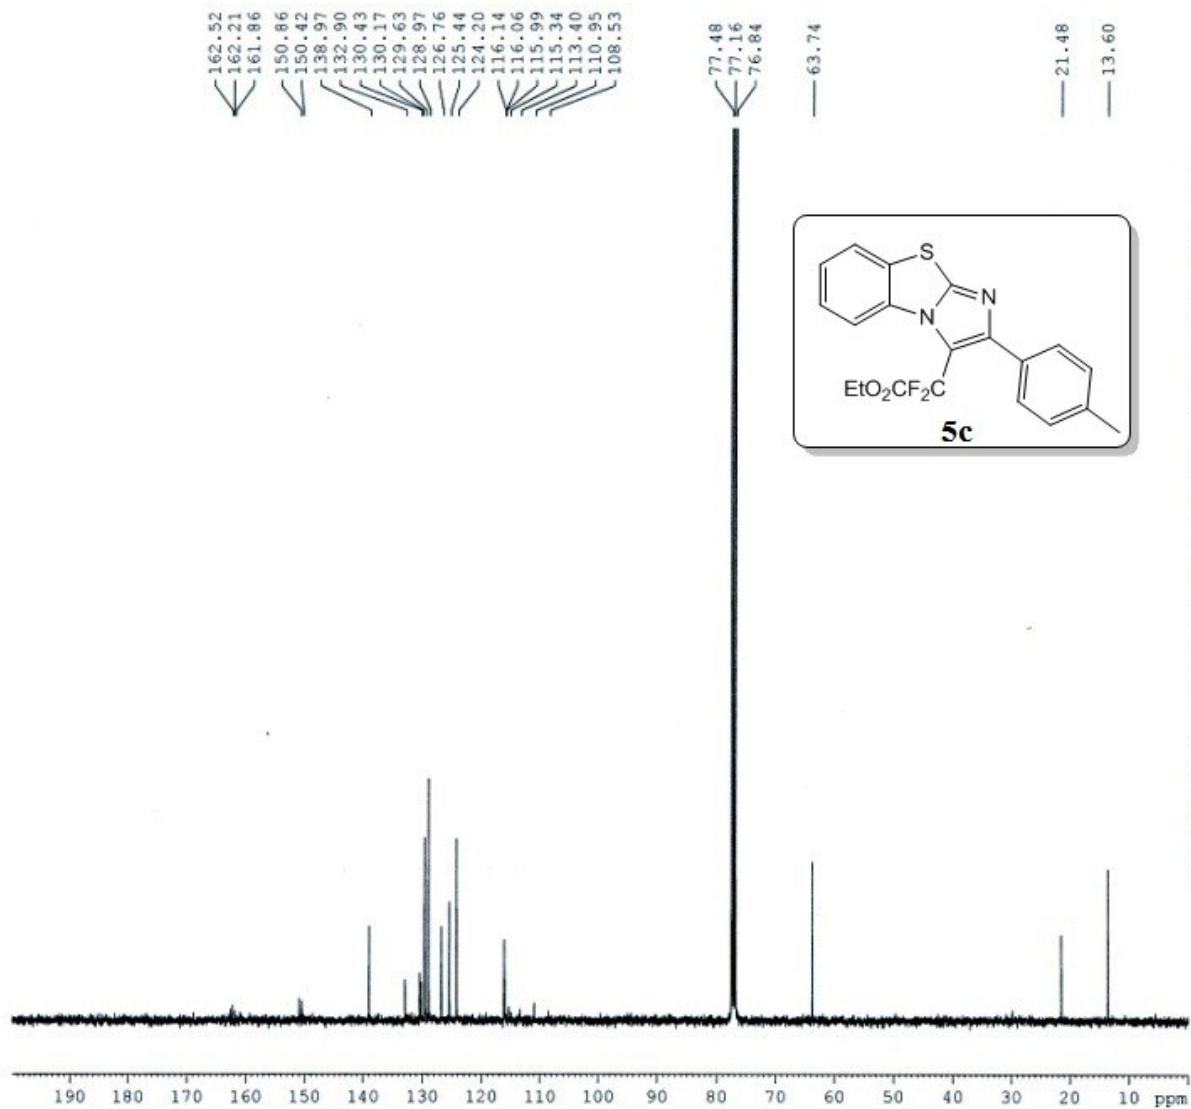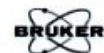

Current Data Parameters  
 NAME Dr. A HAJRA 2015  
 EXPNO 463  
 PROCNO 1

F2 - Acquisition Parameters  
 Date\_ 20150803  
 Time 14.56  
 INSTRUM spect  
 PROBRD 5 mm PABBO BB/  
 PULPROG zgpg30  
 TD 32768  
 SOLVENT CDC13  
 NS 800  
 DS 2  
 SWH 24038.461 Hz  
 FIDRES 0.733596 Hz  
 AQ 0.6816244 sec  
 RG 120.16  
 DW 20.800 usec  
 DE 6.50 usec  
 TE 298.3 K  
 D1 2.0000000 sec  
 D11 0.0300000 sec  
 TDO 1

----- CHANNEL f1 -----  
 NUC1 13C  
 P1 8.90 usec  
 PLW1 54.00000000 W  
 SFO1 100.6278588 MHz

----- CHANNEL f2 -----  
 CPDPRG2 waltz16  
 NUC2 1H  
 PCPD2 80.00 usec  
 PLW2 12.00000000 W  
 PLW12 0.40792999 W  
 PLW13 0.26107001 W  
 SFO2 400.1516006 MHz

F2 - Processing parameters  
 SI 16384  
 SF 100.6177836 MHz  
 NDW EM  
 SSB 0  
 LB 1.00 Hz  
 GB 0  
 PC 1.40

---90.14

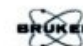

Current Data Parameters  
NAME Dr. A HAJRA 2015  
EXPNO 482  
PROCNO 1

F2 - Acquisition Parameters  
Date\_ 20150803  
Time 13.16  
INSTRUM spect  
PROBHD 5 mm PABBO BB/  
PULPROG zgpg30  
TD 32768  
SOLVENT CDC13  
NS 16  
DS 2  
SWH 89285.711 Hz  
FIDRES 2.724784 Hz  
AQ 0.1835508 sec  
RG 120.16  
DF 5.600 usec  
DE 6.50 usec  
TE 296.8 K  
D1 1.00000000 sec  
TDO 1

\*\*\*\*\* CHANNEL f1 \*\*\*\*\*  
NUC1 19F  
P1 12.50 usec  
PLW1 20.00000000 W  
SFO1 376.4795333 MHz

F2 - Processing parameters  
SI 16384  
SF 376.5171850 MHz  
WVW EM  
SSB 0  
LB 0.30 Hz  
GB 0  
PC 1.00

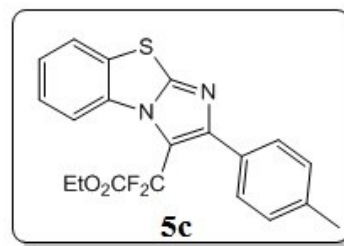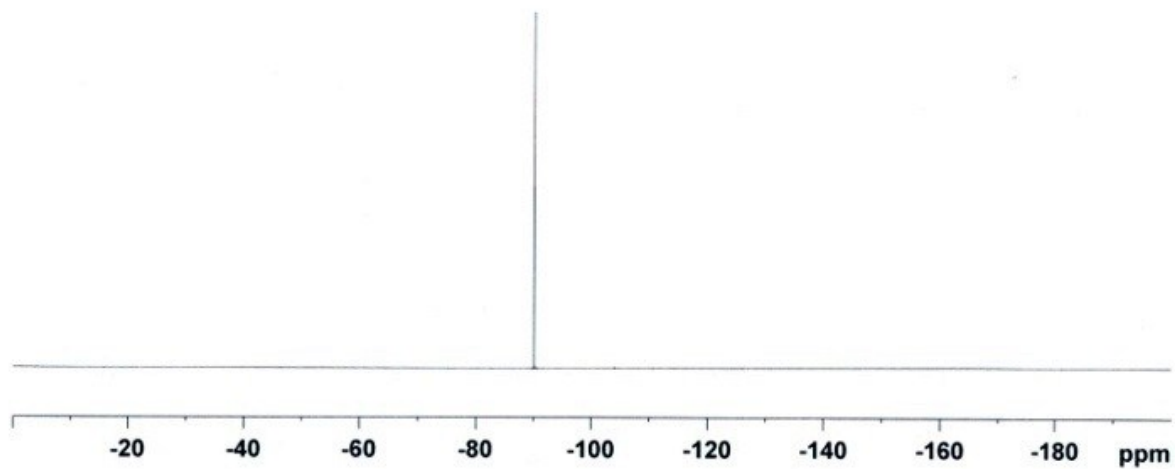

Supplement: c5ob02363g1.pdf [file c5ob02363g1.pdf]
